# Supplementary material for: Granulocyte-Colony-Stimulating Factor Alters the Proteomic Landscape of the Ventral Tegmental Area
Source: Proteomes. 2018 Sep 23;6(4):35. doi: 10.3390/proteomes6040035 (PMC6313867; doi:10.3390/proteomes6040035)
Supplement: Supplementary file 1 [file proteomes-06-00035-s001.xlsx]

## Sheet: Description of Supp Tables
Table	Description
S1	All significantly regulated proteins for each pairwise comparison with corresponding p-value and Log2 Fold Change.
S2	Significantly regulated proteins predicted to be downstream of FMRP with p value, log ratio, predicted protein function and cellular location
S3	Significantly regulated proteins predicted to be downstream of mTOR with p value, log ratio, predicted protein function and cellular location
S4	Significantly regulated proteins predicted to be involved with neuronal morphology with p value, log ratio, predicted protein function and cellular location
S5	Breakdown of all significantly regulated proteins from all 7 portions of the Venn diagram presented in Figure 6. P values and Log2 Fold Change relative to saline are also presented.
S6	Comparisons of significantly regulated canonical signaling pathways for each treatment group as predicted with Ingenuity Pathway Analysis. P values, z-scores, and involved molecules are listed
S7	Gene ontology analysis of predicted molecular function of all significantly upregulated proteins in each pairwise comparison.
S8	Gene ontology analysis of predicted cellular component of all significantly upregulated proteins in each pairwise comparison.
S9	Predicted transcription factors of upregulated proteins for each pairwise comparison
S10	Lists of significantly regulated proteins following the pattern of Saline < G-CSF < Cocaine < G-CSF + Cocaine and Saline > G-CSF > Cocaine > G-CSF + Cocaine.

## Sheet: S1 All Sig Reg Proteins
All proteins with a statistically significant change (p <0.05 [uncorrected]) relative to saline by treatment group															**This section is a listing of all those proteins in the G-CSF + Cocaine group significantly changed relative to the cocaine group**
G-CSF vs Saline					Coc. vs Saline					G-CSF + Coc. vs Saline					G-CSF + Coc. vs Coc.
Accession Number	T-Test	Log2 (GCSF / Sal)			Accession Number	T-Test	Log2 (Cocaine / Sal)			Accession Number	T-Test	Log2(G+C / Sal)			Accession Number	T-Test	Log2(G+C / Coc)
ACOT6_MOUSE	0.0037	1.45			FLNB_MOUSE	0.015	1.26			TAGL_MOUSE	0.025	1.6			TAGL_MOUSE	0.021	1.58
FLNB_MOUSE	0.0095	1.29			EHD2_MOUSE	0.015	1.08			FLNB_MOUSE	0.012	1.43			MYL6_MOUSE	0.0001	0.8
VGLU1_MOUSE	0.0001	1.25			K1C42_MOUSE	0.0023	1.02			FLNA_MOUSE	0.0001	1.01			NSMA2_MOUSE	0.0098	0.79
TAGL_MOUSE	0.046	1.07			K1C10_MOUSE	0.0015	0.96			MYH11_MOUSE	0.0001	1.01			PDE10_MOUSE	0.0027	0.71
EHD2_MOUSE	0.014	1			MYH11_MOUSE	0.0001	0.88			ANXA2_MOUSE	0.02	0.95			WFS1_MOUSE	0.028	0.67
MYH11_MOUSE	0.0001	0.97			FLNA_MOUSE	0.00033	0.74			HDAC2_MOUSE	0.00047	0.87			PHAR1_MOUSE	0.01	0.64
FLNA_MOUSE	0.0001	0.86			VWA1_MOUSE	0.037	0.72			VWA1_MOUSE	0.028	0.74			PDE2A_MOUSE	0.0001	0.63
SRBS2_MOUSE	0.003	0.81			TPC10_MOUSE	0.048	0.63			SYCC_MOUSE	0.0024	0.63			PCP4_MOUSE	0.00055	0.62
HAP1_MOUSE	0.0005	0.71			VGLU1_MOUSE	0.0023	0.62			VIME_MOUSE	0.00044	0.62			CBR3_MOUSE	0.0042	0.62
K1C42_MOUSE	0.011	0.66			CDD_MOUSE	0.012	0.61			PTRF_MOUSE	0.0043	0.6			GFAP_MOUSE	0.0054	0.62
ANXA2_MOUSE	0.045	0.65			PNPO_MOUSE	0.04	0.61			TINAL_MOUSE	0.011	0.6			ADCY5_MOUSE	0.0021	0.57
SYGP1_MOUSE	0.00086	0.63			S27A4_MOUSE	0.04	0.6			RGPA1_MOUSE	0.0089	0.51			COX5A_MOUSE	0.013	0.54
VIME_MOUSE	0.0001	0.62			VAMP1_MOUSE	0.0018	0.59			MYL6_MOUSE	0.0001	0.48			ENSA_MOUSE	0.0073	0.49
SPHK2_MOUSE	0.023	0.6			TINAL_MOUSE	0.014	0.56			PGBM_MOUSE	0.0014	0.47			PDE1A_MOUSE	0.04	0.49
CPSF6_MOUSE	0.021	0.58			TBA8_MOUSE	0.0024	0.55			EHBP1_MOUSE	0.044	0.47			GUAD_MOUSE	0.0001	0.45
ARLY_MOUSE	0.039	0.57			BTBDH_MOUSE	0.01	0.55			APEX1_MOUSE	0.00013	0.46			CRYM_MOUSE	0.00047	0.45
NCALD_MOUSE	0.00052	0.56			CLMN_MOUSE	0.024	0.55			CACP_MOUSE	0.024	0.46			FBP1L_MOUSE	0.018	0.44
MLEC_MOUSE	0.0002	0.55			K22E_MOUSE	0.04	0.55			HS12B_MOUSE	0.031	0.46			BAIP2_MOUSE	0.0001	0.42
RGRF2_MOUSE	0.0062	0.55			SRBS2_MOUSE	0.038	0.54			FGF1_MOUSE	0.045	0.44			CPLX2_MOUSE	0.013	0.41
ESYT1_MOUSE	0.018	0.55			GBRB3_MOUSE	0.046	0.54			VGLU1_MOUSE	0.0096	0.43			CARL2_MOUSE	0.0001	0.4
PTRF_MOUSE	0.0096	0.54			SYCC_MOUSE	0.017	0.49			MESD_MOUSE	0.02	0.43			RAP2B_MOUSE	0.013	0.4
PPR21_MOUSE	0.012	0.54			DRG1_MOUSE	0.021	0.49			TMX3_MOUSE	0.0032	0.41			C1QC_MOUSE	0.00071	0.38
SYCC_MOUSE	0.013	0.54			PRVA_MOUSE	0.031	0.47			COQ9_MOUSE	0.0094	0.41			MK03_MOUSE	0.0097	0.38
VAMP1_MOUSE	0.0085	0.53			PGBM_MOUSE	0.00015	0.46			TIM22_MOUSE	0.011	0.41			FXL16_MOUSE	0.022	0.38
EHBP1_MOUSE	0.045	0.53			HAP1_MOUSE	0.0043	0.45			TBA8_MOUSE	0.015	0.41			PDE1B_MOUSE	0.00041	0.37
SRS10_MOUSE	0.046	0.53			ABCF2_MOUSE	0.039	0.45			COX5A_MOUSE	0.012	0.39			WDR47_MOUSE	0.011	0.36
HNRPM_MOUSE	0.021	0.51			KAP1_MOUSE	0.042	0.45			SQSTM_MOUSE	0.023	0.39			PTN5_MOUSE	0.027	0.36
PRP8_MOUSE	0.04	0.5			COR2A_MOUSE	0.031	0.44			TFAM_MOUSE	0.023	0.37			MRO2B_MOUSE	0.03	0.36
CSPG5_MOUSE	0.00059	0.49			KHDR3_MOUSE	0.0049	0.43			FUS_MOUSE	0.0001	0.36			PSMD7_MOUSE	0.0028	0.35
LIMC1_MOUSE	0.015	0.48			SYGP1_MOUSE	0.022	0.42			LAMC1_MOUSE	0.0047	0.36			UCHL3_MOUSE	0.018	0.34
ANS1B_MOUSE	0.02	0.48			ATG7_MOUSE	0.021	0.41			MOES_MOUSE	0.0075	0.36			KPCG_MOUSE	0.018	0.34
BRSK1_MOUSE	0.028	0.48			FGF1_MOUSE	0.047	0.41			RAB9A_MOUSE	0.011	0.36			WASF1_MOUSE	0.0011	0.32
PGBM_MOUSE	0.00032	0.47			IF2A_MOUSE	0.0031	0.39			PTMA_MOUSE	0.022	0.36			AFAD_MOUSE	0.029	0.32
EIF3H_MOUSE	0.00043	0.46			SQSTM_MOUSE	0.049	0.39			PNPO_MOUSE	0.043	0.36			IPP2_MOUSE	0.0015	0.31
LAMC1_MOUSE	0.00072	0.46			LAMC1_MOUSE	0.0015	0.38			CARL2_MOUSE	0.00014	0.34			KCC2A_MOUSE	0.0029	0.31
KHDR3_MOUSE	0.00094	0.46			HPLN1_MOUSE	0.027	0.38			TLN1_MOUSE	0.00078	0.34			TMX3_MOUSE	0.012	0.31
AMRP_MOUSE	0.0063	0.46			BCAM_MOUSE	0.043	0.38			RAGP1_MOUSE	0.023	0.34			MARCS_MOUSE	0.00013	0.3
DLGP3_MOUSE	0.015	0.46			TFAM_MOUSE	0.044	0.38			BASP1_MOUSE	0.0001	0.33			CYB5B_MOUSE	0.0014	0.3
PLPL6_MOUSE	0.0001	0.45			LAMB2_MOUSE	0.0001	0.37			HAP1_MOUSE	0.0043	0.33			GIT1_MOUSE	0.0027	0.3
F120A_MOUSE	0.0014	0.45			DHX30_MOUSE	0.03	0.37			AHI1_MOUSE	0.004	0.32			TPM1_MOUSE	0.021	0.3
MIC25_MOUSE	0.0039	0.45			VIME_MOUSE	0.045	0.37			CLCB_MOUSE	0.0048	0.32			ANLN_MOUSE	0.013	0.27
UBXN4_MOUSE	0.032	0.45			NCALD_MOUSE	0.043	0.36			GPC5B_MOUSE	0.013	0.32			MPP3_MOUSE	0.035	0.27
CALB2_MOUSE	0.0001	0.42			ASNS_MOUSE	0.0001	0.35			ATG7_MOUSE	0.039	0.32			FEZ1_MOUSE	0.045	0.27
RBM14_MOUSE	0.0013	0.42			DLGP3_MOUSE	0.028	0.35			FNBP1_MOUSE	0.0052	0.31			NEUM_MOUSE	0.0001	0.26
AHI1_MOUSE	0.0015	0.42			OSBL6_MOUSE	0.029	0.35			API5_MOUSE	0.014	0.31			KPCB_MOUSE	0.0079	0.26
APEX1_MOUSE	0.0058	0.42			EIF3H_MOUSE	0.0012	0.34			IF2A_MOUSE	0.043	0.31			GP158_MOUSE	0.0025	0.25
IQEC2_MOUSE	0.0063	0.42			SRRM2_MOUSE	0.023	0.34			C170B_MOUSE	0.043	0.31			RPGF4_MOUSE	0.025	0.25
CCAR2_MOUSE	0.01	0.4			SEPT9_MOUSE	0.00064	0.33			LMNA_MOUSE	0.0001	0.3			VP13C_MOUSE	0.031	0.25
FUS_MOUSE	0.0001	0.39			MP2K4_MOUSE	0.0039	0.33			RBM14_MOUSE	0.0046	0.3			TPD52_MOUSE	0.018	0.24
GRIN1_MOUSE	0.0001	0.39			AT1B3_MOUSE	0.0066	0.33			ELAV1_MOUSE	0.01	0.29			KCC2B_MOUSE	0.0001	0.23
KAD4_MOUSE	0.00028	0.39			COF2_MOUSE	0.032	0.33			EIF3H_MOUSE	0.011	0.29			DCE2_MOUSE	0.0095	0.23
ARVC_MOUSE	0.00097	0.39			DIC_MOUSE	0.036	0.33			RS10_MOUSE	0.038	0.29			CAP2_MOUSE	0.018	0.23
CAMKV_MOUSE	0.0043	0.39			BASP1_MOUSE	0.0001	0.32			SRBS1_MOUSE	0.039	0.29			KIF3A_MOUSE	0.029	0.23
RAGP1_MOUSE	0.013	0.39			VGLU2_MOUSE	0.00068	0.32			MECP2_MOUSE	0.0001	0.28			PADI2_MOUSE	0.039	0.23
FLOT1_MOUSE	0.0001	0.38			APEX1_MOUSE	0.02	0.32			COQ6_MOUSE	0.00023	0.28			CAP1_MOUSE	0.0001	0.22
SEPT9_MOUSE	0.00055	0.38			MAP2_MOUSE	0.024	0.32			PA1B3_MOUSE	0.00023	0.28			MLC1_MOUSE	0.029	0.22
CP46A_MOUSE	0.007	0.38			RAGP1_MOUSE	0.043	0.32			H14_MOUSE	0.0087	0.28			MARK2_MOUSE	0.034	0.22
PRP19_MOUSE	0.016	0.38			NOVA1_MOUSE	0.045	0.32			AMRP_MOUSE	0.037	0.28			F177A_MOUSE	0.048	0.22
TR112_MOUSE	0.041	0.38			H2AY_MOUSE	0.0001	0.31			LMNB2_MOUSE	0.00025	0.27			DDX17_MOUSE	0.016	0.21
MATR3_MOUSE	0.0001	0.37			LMNB2_MOUSE	0.00038	0.3			TPM4_MOUSE	0.001	0.27			SAHH3_MOUSE	0.017	0.21
NOS1_MOUSE	0.0013	0.37			AHI1_MOUSE	0.0091	0.3			AN13D_MOUSE	0.0065	0.27			RLA2_MOUSE	0.00015	0.2
ATG7_MOUSE	0.015	0.37			CSPG5_MOUSE	0.017	0.3			ETHE1_MOUSE	0.014	0.27			KINH_MOUSE	0.022	0.2
PCBP3_MOUSE	0.023	0.37			PRP19_MOUSE	0.039	0.3			ANLN_MOUSE	0.022	0.27			C2C2L_MOUSE	0.0014	0.19
LA_MOUSE	0.044	0.37			SHAN1_MOUSE	0.041	0.3			SEPT9_MOUSE	0.0034	0.26			ADHX_MOUSE	0.021	0.19
MECP2_MOUSE	0.0001	0.36			LMNA_MOUSE	0.0001	0.29			HS71A_MOUSE (+1)	0.0043	0.26			GTR3_MOUSE	0.023	0.19
MYH9_MOUSE	0.00022	0.36			ANK1_MOUSE	0.0006	0.29			MARCS_MOUSE	0.0088	0.26			MP2K1_MOUSE	0.029	0.19
ETHE1_MOUSE	0.00072	0.36			RS10_MOUSE	0.0026	0.29			RLA1_MOUSE	0.024	0.26			PP1R7_MOUSE	0.024	0.18
PTBP2_MOUSE	0.0028	0.36			TLN1_MOUSE	0.0035	0.29			CBPM_MOUSE	0.041	0.26			TOM22_MOUSE	0.025	0.18
GLPK_MOUSE	0.0075	0.36			CALB2_MOUSE	0.0036	0.29			CYB5B_MOUSE	0.00014	0.25			PTGR2_MOUSE	0.025	0.18
PITM1_MOUSE	0.018	0.36			PTPRA_MOUSE	0.0094	0.29			H2AY_MOUSE	0.0017	0.25			AL1B1_MOUSE	0.028	0.18
DX39B_MOUSE	0.021	0.36			SRBS1_MOUSE	0.038	0.29			KAD4_MOUSE	0.0067	0.25			UBP14_MOUSE	0.035	0.18
TPR_MOUSE	0.029	0.36			MECP2_MOUSE	0.0001	0.28			MYH9_MOUSE	0.016	0.25			NBEA_MOUSE	0.021	0.17
ACS2L_MOUSE	0.043	0.36			COQ6_MOUSE	0.00017	0.28			KHDR3_MOUSE	0.023	0.25			EHD3_MOUSE	0.039	0.17
TBA8_MOUSE	0.044	0.36			PA1B3_MOUSE	0.0015	0.28			MOCS3_MOUSE	0.044	0.25			SH3L1_MOUSE	0.045	0.17
SHAN1_MOUSE	0.045	0.36			ZN512_MOUSE	0.01	0.28			MK10_MOUSE	0.0044	0.24			FN3K_MOUSE	0.0033	0.16
EFHD2_MOUSE	0.00027	0.35			IF2P_MOUSE	0.026	0.28			H15_MOUSE	0.013	0.24			PCNP_MOUSE	0.024	0.16
NOP56_MOUSE	0.0024	0.35			AMRP_MOUSE	0.041	0.28			RS26_MOUSE	0.026	0.24			STMN1_MOUSE	0.0062	0.15
API5_MOUSE	0.0045	0.35			MATR3_MOUSE	0.0001	0.27			H4_MOUSE	0.006	0.23			ARP2_MOUSE	0.0029	0.14
MOES_MOUSE	0.014	0.35			H4_MOUSE	0.0002	0.27			ARMC6_MOUSE	0.0095	0.23			KCC1D_MOUSE	0.0053	0.14
RALY_MOUSE	0.039	0.35			RT34_MOUSE	0.0039	0.27			SASH1_MOUSE	0.015	0.23			THIO_MOUSE	0.037	0.14
HP1B3_MOUSE	0.00086	0.34			ABLM2_MOUSE	0.0074	0.27			REEP2_MOUSE	0.017	0.23			PLPP_MOUSE	0.048	0.14
VGLU2_MOUSE	0.0012	0.34			PLPL6_MOUSE	0.016	0.27			TMM65_MOUSE	0.017	0.23			PRC2A_MOUSE	0.048	0.14
NOLC1_MOUSE	0.0092	0.34			HPLN4_MOUSE	0.031	0.27			CHM4B_MOUSE	0.018	0.23			PRDX6_MOUSE	0.0078	0.13
RL13_MOUSE	0.01	0.34			ROA3_MOUSE	0.00051	0.26			HP1B3_MOUSE	0.022	0.23			PFKAL_MOUSE	0.028	0.13
ZN512_MOUSE	0.022	0.34			HNRH2_MOUSE	0.014	0.26			MP2K4_MOUSE	0.04	0.23			SYEP_MOUSE	0.028	0.13
SNTA1_MOUSE	0.029	0.34			CAZA1_MOUSE	0.02	0.26			PZP_MOUSE	0.046	0.23			PDIA6_MOUSE	0.044	0.13
LMNB1_MOUSE	0.0001	0.33			PITM1_MOUSE	0.044	0.26			RS20_MOUSE	0.047	0.23			FSCN1_MOUSE	0.018	0.12
LASP1_MOUSE	0.00085	0.33			HBB1_MOUSE	0.00023	0.25			CAN5_MOUSE	0.049	0.23			1433Z_MOUSE	0.034	0.11
DLG3_MOUSE	0.0032	0.33			AKA12_MOUSE	0.00059	0.25			ZO1_MOUSE	0.0035	0.22			PCLO_MOUSE	0.039	0.1
RHG35_MOUSE	0.0036	0.33			LPPRC_MOUSE	0.00096	0.25			ALBU_MOUSE	0.0061	0.22			HXK1_MOUSE	0.037	-0.05
PSD12_MOUSE	0.005	0.33			ATPK_MOUSE	0.0062	0.25			ZN512_MOUSE	0.031	0.22			ATPB_MOUSE	0.0077	-0.06
EEA1_MOUSE	0.0052	0.33			MYH9_MOUSE	0.0082	0.25			VGLU2_MOUSE	0.048	0.22			CNTN1_MOUSE	0.043	-0.06
WBP11_MOUSE	0.0085	0.33			S4A10_MOUSE	0.011	0.25			RLA2_MOUSE	0.00019	0.21			ACLY_MOUSE	0.026	-0.07
CAPS2_MOUSE	0.0089	0.33			FNBP1_MOUSE	0.012	0.25			HBA_MOUSE	0.0066	0.21			SSDH_MOUSE	0.024	-0.08
HPLN4_MOUSE	0.011	0.33			AASD1_MOUSE	0.023	0.25			FN3K_MOUSE	0.007	0.21			ACSL6_MOUSE	0.031	-0.08
COPG1_MOUSE	0.023	0.33			CAPS2_MOUSE	0.043	0.25			ANXA5_MOUSE	0.0074	0.21			MDHC_MOUSE	0.042	-0.08
TIF1B_MOUSE	0.026	0.33			SNP47_MOUSE	0.0004	0.24			ACTN4_MOUSE	0.011	0.21			NCAM1_MOUSE	0.045	-0.08
ATAD3_MOUSE	0.034	0.33			TM1L2_MOUSE	0.00082	0.24			PCNP_MOUSE	0.013	0.21			SUCB1_MOUSE	0.047	-0.08
TIM22_MOUSE	0.048	0.33			PCKGM_MOUSE	0.0047	0.24			SYNRG_MOUSE	0.014	0.21			MDHM_MOUSE	0.0091	-0.09
LMNA_MOUSE	0.0001	0.32			PSPC1_MOUSE	0.0076	0.24			SH3K1_MOUSE	0.015	0.21			VDAC3_MOUSE	0.033	-0.09
SET_MOUSE	0.0001	0.32			RS26_MOUSE	0.023	0.24			ASNS_MOUSE	0.02	0.21			SNP47_MOUSE	0.044	-0.09
EVL_MOUSE	0.00093	0.32			TMEDA_MOUSE	0.046	0.24			NHRF2_MOUSE	0.021	0.21			HS74L_MOUSE	0.013	-0.1
AT2B4_MOUSE	0.005	0.32			IPYR2_MOUSE	0.00049	0.23			KHDR2_MOUSE	0.022	0.21			DLDH_MOUSE	0.015	-0.1
FBLL1_MOUSE	0.005	0.32			FUS_MOUSE	0.00081	0.23			SET_MOUSE	0.0001	0.2			QCR2_MOUSE	0.016	-0.1
DRG2_MOUSE	0.022	0.32			AUHM_MOUSE	0.0031	0.23			ROA3_MOUSE	0.0063	0.2			ALDOC_MOUSE	0.021	-0.1
G3BP2_MOUSE	0.039	0.32			CLYBL_MOUSE	0.0032	0.23			VWA8_MOUSE	0.0078	0.2			PUR9_MOUSE	0.022	-0.1
KCC2D_MOUSE	0.0001	0.31			NFH_MOUSE	0.0053	0.23			KI21A_MOUSE	0.0079	0.2			VATH_MOUSE	0.024	-0.1
DGKQ_MOUSE	0.0041	0.31			PPCEL_MOUSE	0.013	0.23			S27A1_MOUSE	0.033	0.2			VISL1_MOUSE	0.03	-0.1
GSTT3_MOUSE	0.02	0.31			RHG35_MOUSE	0.014	0.23			RASA3_MOUSE	0.048	0.2			THY1_MOUSE	0.04	-0.1
RAB9A_MOUSE	0.025	0.31			ACSF2_MOUSE	0.021	0.23			PDIA6_MOUSE	0.0024	0.19			AT1A3_MOUSE	0.0001	-0.11
SYFA_MOUSE	0.046	0.31			RL26_MOUSE	0.025	0.23			TBCD_MOUSE	0.01	0.19			NDUB4_MOUSE	0.015	-0.11
ROA3_MOUSE	0.0001	0.3			FXR1_MOUSE	0.03	0.23			GBRL2_MOUSE	0.014	0.19			ES1_MOUSE	0.026	-0.11
NEUA_MOUSE	0.00012	0.3			GBRL2_MOUSE	0.039	0.23			HBB1_MOUSE	0.039	0.19			PHIPL_MOUSE	0.031	-0.11
TMEDA_MOUSE	0.018	0.3			ELAV1_MOUSE	0.045	0.23			DDX6_MOUSE	0.0063	0.18			COF1_MOUSE	0.033	-0.11
BT3L4_MOUSE	0.022	0.3			DGKQ_MOUSE	0.047	0.23			RGRF1_MOUSE	0.014	0.18			IMPA1_MOUSE	0.038	-0.11
CLUS_MOUSE	0.025	0.3			CLAP1_MOUSE	0.0001	0.22			VAT1_MOUSE	0.014	0.18			IDH3A_MOUSE	0.0079	-0.12
ZFR_MOUSE	0.03	0.3			ACTN4_MOUSE	0.00058	0.22			MAOX_MOUSE	0.014	0.18			OTUB1_MOUSE	0.01	-0.12
PLCX3_MOUSE	0.032	0.3			NFL_MOUSE	0.0038	0.22			HDGR3_MOUSE	0.021	0.18			ODPA_MOUSE	0.016	-0.12
PKHA6_MOUSE	0.033	0.3			PUR4_MOUSE	0.0093	0.22			LASP1_MOUSE	0.025	0.18			AKA12_MOUSE	0.02	-0.12
SNX16_MOUSE	0.037	0.3			PPM1F_MOUSE	0.025	0.22			FXR1_MOUSE	0.036	0.18			ILF3_MOUSE	0.026	-0.12
AP1B1_MOUSE	0.0001	0.29			KAD4_MOUSE	0.028	0.22			PCKGM_MOUSE	0.038	0.18			RS7_MOUSE	0.043	-0.12
H2AY_MOUSE	0.0001	0.29			NDUBB_MOUSE	0.035	0.22			FLOT1_MOUSE	0.04	0.17			AATM_MOUSE	0.0001	-0.13
KAP3_MOUSE	0.00028	0.29			HBA_MOUSE	0.0001	0.21			PSPC1_MOUSE	0.041	0.17			NDUS1_MOUSE	0.00046	-0.13
K1468_MOUSE	0.00043	0.29			GARS_MOUSE	0.00053	0.21			STMN1_MOUSE	0.0011	0.16			MATR3_MOUSE	0.013	-0.13
SYYM_MOUSE	0.0007	0.29			LMNB1_MOUSE	0.0037	0.21			GALE_MOUSE	0.022	0.16			ODO2_MOUSE	0.017	-0.13
ILF3_MOUSE	0.0025	0.29			REEP2_MOUSE	0.021	0.21			PSIP1_MOUSE	0.025	0.16			NDUA8_MOUSE	0.022	-0.13
IF2A_MOUSE	0.0044	0.29			A1AT2_MOUSE	0.037	0.21			TCTP_MOUSE	0.025	0.16			DDX1_MOUSE	0.032	-0.13
TLN1_MOUSE	0.0051	0.29			NUCL_MOUSE	0.0001	0.2			ENPL_MOUSE	0.029	0.16			SFXN3_MOUSE	0.04	-0.13
COX1_MOUSE	0.0093	0.29			UBL4A_MOUSE	0.00034	0.2			HPLN2_MOUSE	0.029	0.16			AT1B2_MOUSE	0.042	-0.13
RLA1_MOUSE	0.01	0.29			EFHD2_MOUSE	0.0048	0.2			UBP14_MOUSE	0.033	0.16			TAGL3_MOUSE	0.0012	-0.14
RS4X_MOUSE	0.011	0.29			HNRPL_MOUSE	0.011	0.2			EMD_MOUSE	0.048	0.16			GARS_MOUSE	0.0027	-0.14
SNG1_MOUSE	0.013	0.29			MECR_MOUSE	0.013	0.2			GSTA4_MOUSE	0.0092	0.15			PRDX5_MOUSE	0.003	-0.14
DDI2_MOUSE	0.026	0.29			FLOT1_MOUSE	0.015	0.2			SNP47_MOUSE	0.014	0.15			CLAP1_MOUSE	0.029	-0.14
KIF3A_MOUSE	0.033	0.29			EMD_MOUSE	0.021	0.2			THTR_MOUSE	0.016	0.15			ASNS_MOUSE	0.038	-0.14
GHC1_MOUSE	0.043	0.29			MAOX_MOUSE	0.025	0.2			UBL4A_MOUSE	0.019	0.15			IPYR2_MOUSE	0.043	-0.14
FLOT2_MOUSE	0.0001	0.28			KHDR2_MOUSE	0.038	0.2			PAK1_MOUSE	0.02	0.15			ADT1_MOUSE	0.0057	-0.15
ITSN1_MOUSE	0.0011	0.28			TMM65_MOUSE	0.038	0.2			SYHC_MOUSE	0.022	0.15			NDUS5_MOUSE	0.0061	-0.15
HACD3_MOUSE	0.0034	0.28			6PGD_MOUSE	0.048	0.2			SYDC_MOUSE	0.025	0.15			NDUA5_MOUSE	0.039	-0.15
KCC1A_MOUSE	0.0088	0.28			HMGB1_MOUSE	0.00054	0.19			EMAL1_MOUSE	0.035	0.15			SNAB_MOUSE	0.0091	-0.16
CSN7A_MOUSE	0.013	0.28			VISL1_MOUSE	0.002	0.19			ACY2_MOUSE	0.046	0.15			NDUS4_MOUSE	0.016	-0.16
SRSF7_MOUSE	0.02	0.28			GLSK_MOUSE	0.0037	0.19			ZNT9_MOUSE	0.049	0.15			NDUA9_MOUSE	0.032	-0.16
SF3B1_MOUSE	0.023	0.28			ILF3_MOUSE	0.02	0.19			RL7A_MOUSE	0.0013	0.14			FIS1_MOUSE	0.037	-0.16
AN32A_MOUSE	0.024	0.28			TPM4_MOUSE	0.02	0.19			ROA2_MOUSE	0.0018	0.14			SPN90_MOUSE	0.042	-0.16
PAIRB_MOUSE	0.0001	0.27			RS23_MOUSE	0.021	0.19			GRIN1_MOUSE	0.0022	0.14			GLNA_MOUSE	0.017	-0.17
RL6_MOUSE	0.00098	0.27			SOS1_MOUSE	0.027	0.19			NUCL_MOUSE	0.0024	0.14			LPPRC_MOUSE	0.036	-0.17
PA1B3_MOUSE	0.0011	0.27			RT36_MOUSE	0.031	0.19			TMOD2_MOUSE	0.022	0.14			ZC21A_MOUSE	0.04	-0.17
ACTN4_MOUSE	0.0036	0.27			KCC2G_MOUSE	0.039	0.19			NFL_MOUSE	0.024	0.14			NECP1_MOUSE	0.041	-0.17
HNRPL_MOUSE	0.0062	0.27			DDX1_MOUSE	0.039	0.19			RL10A_MOUSE	0.028	0.14			PSD11_MOUSE	0.0016	-0.18
COR1A_MOUSE	0.0074	0.27			NIPS2_MOUSE	0.0049	0.18			PALM2_MOUSE	0.028	0.14			GBB1_MOUSE	0.018	-0.18
FXR1_MOUSE	0.01	0.27			RL31_MOUSE	0.0084	0.18			GSTP1_MOUSE	0.03	0.14			ANK1_MOUSE	0.0051	-0.19
SF3B3_MOUSE	0.025	0.27			TSN_MOUSE	0.017	0.18			HMGB1_MOUSE	0.034	0.14			TM1L2_MOUSE	0.0057	-0.19
GORS2_MOUSE	0.038	0.27			SAC1_MOUSE	0.027	0.18			EFHD2_MOUSE	0.047	0.14			AUHM_MOUSE	0.01	-0.19
EXOC1_MOUSE	0.039	0.27			PITH1_MOUSE	0.035	0.18			SRCN1_MOUSE	0.0001	0.13			SPTB1_MOUSE	0.017	-0.19
ALBU_MOUSE	0.0001	0.26			ZO1_MOUSE	0.047	0.18			RL23A_MOUSE	0.0027	0.13			FPPS_MOUSE	0.041	-0.19
NUCL_MOUSE	0.0001	0.26			PRS8_MOUSE	0.047	0.18			CALX_MOUSE	0.0046	0.13			STRBP_MOUSE	0.035	-0.2
COQ6_MOUSE	0.00014	0.26			AINX_MOUSE	0.00075	0.17			DPYL3_MOUSE	0.0053	0.13			ENAH_MOUSE	0.049	-0.2
LAMB2_MOUSE	0.0098	0.26			RS3A_MOUSE	0.016	0.17			AINX_MOUSE	0.0058	0.13			RL17_MOUSE	0.016	-0.21
SUGP2_MOUSE	0.022	0.26			LASP1_MOUSE	0.04	0.17			AK1A1_MOUSE	0.012	0.13			GSTM5_MOUSE	0.018	-0.21
PGAM5_MOUSE	0.03	0.26			EF1B_MOUSE	0.045	0.17			PDC6I_MOUSE	0.014	0.13			RT34_MOUSE	0.035	-0.21
PGCB_MOUSE	0.03	0.26			PAIRB_MOUSE	0.0064	0.16			OXR1_MOUSE	0.015	0.13			DIRA1_MOUSE	0.039	-0.21
PTPRA_MOUSE	0.033	0.26			BCAT1_MOUSE	0.0079	0.16			TRFE_MOUSE	0.025	0.13			SYFB_MOUSE	0.014	-0.22
SRCN1_MOUSE	0.0001	0.25			EMAL1_MOUSE	0.015	0.16			MATR3_MOUSE	0.041	0.13			CATB_MOUSE	0.014	-0.22
PUR4_MOUSE	0.0017	0.25			H2AX_MOUSE	0.02	0.16			PICAL_MOUSE	0.046	0.13			PPM1H_MOUSE	0.026	-0.22
HNRPK_MOUSE	0.0019	0.25			CPIN1_MOUSE	0.02	0.16			RS19_MOUSE	0.003	0.12			LAMB2_MOUSE	0.049	-0.22
SAE1_MOUSE	0.0038	0.25			PSD11_MOUSE	0.022	0.16			BIN1_MOUSE	0.0097	0.12			AL1A1_MOUSE	0.00094	-0.23
MK10_MOUSE	0.0063	0.25			HDGR3_MOUSE	0.025	0.16			FLOT2_MOUSE	0.011	0.12			BIRC6_MOUSE	0.037	-0.24
SPRL1_MOUSE	0.011	0.25			BDH_MOUSE	0.026	0.16			ECHA_MOUSE	0.014	0.12			CTRO_MOUSE	0.017	-0.25
WDR13_MOUSE	0.019	0.25			RL10A_MOUSE	0.032	0.16			PAIRB_MOUSE	0.02	0.12			ADDG_MOUSE	0.041	-0.25
RS26_MOUSE	0.023	0.25			NEUA_MOUSE	0.043	0.16			ARL8B_MOUSE	0.025	0.12			GPC1_MOUSE	0.028	-0.26
SEPT6_MOUSE	0.028	0.25			DHX9_MOUSE	0.045	0.16			IDHP_MOUSE	0.034	0.12			PLXA1_MOUSE	0.01	-0.27
HS105_MOUSE	0.03	0.25			S12A2_MOUSE	0.049	0.16			GELS_MOUSE	0.034	0.12			SNP25_MOUSE	0.0002	-0.28
ACOT2_MOUSE	0.042	0.25			ROA2_MOUSE	0.00076	0.15			RS6_MOUSE	0.038	0.12			SC22B_MOUSE	0.031	-0.29
DDX17_MOUSE	0.046	0.25			QCR7_MOUSE	0.0025	0.15			NIPS2_MOUSE	0.039	0.12			SOS1_MOUSE	0.0014	-0.3
SNP47_MOUSE	0.00024	0.24			UBE2K_MOUSE	0.01	0.15			GLSK_MOUSE	0.041	0.12			CALB2_MOUSE	0.00085	-0.32
RL31_MOUSE	0.00066	0.24			CISY_MOUSE	0.015	0.15			PLEC_MOUSE	0.0028	0.11			DHX30_MOUSE	0.04	-0.32
RP3A_MOUSE	0.0026	0.24			KCRU_MOUSE	0.017	0.15			SNX6_MOUSE	0.007	0.11			CSK21_MOUSE	0.018	-0.33
VINC_MOUSE	0.0037	0.24			THTM_MOUSE	0.027	0.15			EHD4_MOUSE	0.021	0.11			HPLN1_MOUSE	0.045	-0.33
COPB_MOUSE	0.023	0.24			ODO2_MOUSE	0.034	0.15			PSMD6_MOUSE	0.028	0.11			FXR2_MOUSE	0.0087	-0.35
SOS1_MOUSE	0.036	0.24			RASK_MOUSE	0.041	0.15			ALDH2_MOUSE	0.031	0.11			CAMP3_MOUSE	0.048	-0.36
LMNB2_MOUSE	0.00055	0.23			SPTB1_MOUSE	0.045	0.15			CAND1_MOUSE	0.001	0.1			AP3M2_MOUSE	0.0046	-0.38
H4_MOUSE	0.00064	0.23			SNX6_MOUSE	0.00013	0.14			AP180_MOUSE	0.021	0.1			VAMP1_MOUSE	0.026	-0.4
HNRPU_MOUSE	0.0028	0.23			AP180_MOUSE	0.0021	0.14			CAH2_MOUSE	0.023	0.1			BTBDH_MOUSE	0.047	-0.4
MCU_MOUSE	0.0028	0.23			OXR1_MOUSE	0.0053	0.14			NFM_MOUSE	0.029	0.09			COF2_MOUSE	0.013	-0.41
CTRO_MOUSE	0.0044	0.23			ATX10_MOUSE	0.0061	0.14			S12A5_MOUSE	0.049	0.09			ACSL3_MOUSE	0.017	-0.42
SFPQ_MOUSE	0.0057	0.23			DC1L2_MOUSE	0.0087	0.14			GRP78_MOUSE	0.0032	0.08			GNAI3_MOUSE	0.035	-0.42
COR1C_MOUSE	0.0069	0.23			EIF3A_MOUSE	0.0093	0.14			MAP1B_MOUSE	0.0034	0.08			BORG4_MOUSE	0.041	-0.42
RS23_MOUSE	0.008	0.23			RS2_MOUSE	0.025	0.14			MTAP2_MOUSE	0.0046	0.07			APOA1_MOUSE	0.0035	-0.44
AL4A1_MOUSE	0.0088	0.23			PALM2_MOUSE	0.028	0.14			SPTN1_MOUSE	0.0001	-0.06			EPN1_MOUSE	0.01	-0.46
DCLK1_MOUSE	0.011	0.23			PDC6I_MOUSE	0.032	0.14			KPYM_MOUSE	0.041	-0.06			TY3H_MOUSE	0.0035	-0.48
LARP1_MOUSE	0.015	0.23			DREB_MOUSE	0.04	0.14			SPTB2_MOUSE	0.0002	-0.07			IGLO5_MOUSE	0.043	-0.49
FA49A_MOUSE	0.016	0.23			DLDH_MOUSE	0.042	0.14			DPYL2_MOUSE	0.0091	-0.07			CDV3_MOUSE	0.029	-0.5
LANC2_MOUSE	0.027	0.23			PLEC_MOUSE	0.0001	0.13			TPIS_MOUSE	0.0079	-0.09			CDD_MOUSE	0.023	-0.52
GNA13_MOUSE	0.028	0.23			RL23A_MOUSE	0.0016	0.13			ENOA_MOUSE	0.0086	-0.09			K22E_MOUSE	0.021	-0.66
TIM29_MOUSE	0.035	0.23			ACLY_MOUSE	0.0036	0.13			ACBG1_MOUSE	0.024	-0.1			K2C1_MOUSE	0.034	-0.99
PCKGM_MOUSE	0.037	0.23			CAPS1_MOUSE	0.0072	0.13			AATM_MOUSE	0.0028	-0.11			K1C10_MOUSE	0.00067	-1.12
UGGG1_MOUSE	0.041	0.23			AK1A1_MOUSE	0.013	0.13			LDHB_MOUSE	0.0075	-0.11
AMPH_MOUSE	0.0001	0.22			NDUB4_MOUSE	0.016	0.13			MPCP_MOUSE	0.035	-0.11
EAA2_MOUSE	0.0001	0.22			ECHB_MOUSE	0.018	0.13			GDIB_MOUSE	0.045	-0.11
GRP78_MOUSE	0.0001	0.22			ATP5H_MOUSE	0.021	0.13			CKAP5_MOUSE	0.047	-0.11
RL7A_MOUSE	0.0001	0.22			DPYL3_MOUSE	0.021	0.13			ENOG_MOUSE	0.0037	-0.12
ROA2_MOUSE	0.00017	0.22			RS19_MOUSE	0.026	0.13			DPYL1_MOUSE	0.0047	-0.12
HNRPQ_MOUSE	0.00039	0.22			DECR_MOUSE	0.037	0.13			PFKAM_MOUSE	0.005	-0.12
MIC19_MOUSE	0.00041	0.22			GSTA4_MOUSE	0.048	0.13			STX1B_MOUSE	0.0094	-0.12
IDHP_MOUSE	0.00064	0.22			ECHM_MOUSE	0.049	0.13			VDAC1_MOUSE	0.0046	-0.13
DREB_MOUSE	0.0013	0.22			TCTP_MOUSE	0.049	0.13			RAB2A_MOUSE	0.022	-0.13
PAK1_MOUSE	0.0036	0.22			MTAP2_MOUSE	0.0001	0.12			ARP2_MOUSE	0.024	-0.13
HNRPC_MOUSE	0.0047	0.22			SERC_MOUSE	0.0091	0.12			VDAC2_MOUSE	0.026	-0.13
H2AX_MOUSE	0.0067	0.22			ODPA_MOUSE	0.0099	0.12			SV2A_MOUSE	0.044	-0.13
TDRKH_MOUSE	0.038	0.22			CAH2_MOUSE	0.011	0.12			STXB1_MOUSE	0.0001	-0.14
PSD3_MOUSE	0.041	0.22			NDUS3_MOUSE	0.017	0.12			VPP1_MOUSE	0.001	-0.14
HEMH_MOUSE	0.045	0.22			KI21A_MOUSE	0.017	0.12			WDR7_MOUSE	0.0035	-0.14
6PGD_MOUSE	0.046	0.22			PDIA1_MOUSE	0.021	0.12			SYN1_MOUSE	0.0059	-0.14
VP33B_MOUSE	0.049	0.22			ATPO_MOUSE	0.023	0.12			G6PI_MOUSE	0.0072	-0.14
EIF3A_MOUSE	0.00034	0.21			RTCB_MOUSE	0.036	0.12			PDXK_MOUSE	0.0077	-0.14
GLSK_MOUSE	0.0012	0.21			NDUA9_MOUSE	0.038	0.12			AL7A1_MOUSE	0.015	-0.14
PSPC1_MOUSE	0.0031	0.21			THIL_MOUSE	0.0063	0.11			TMM11_MOUSE	0.027	-0.14
SFXN1_MOUSE	0.0047	0.21			HNRPD_MOUSE	0.0089	0.11			SNAB_MOUSE	0.033	-0.14
RL10A_MOUSE	0.0072	0.21			CALX_MOUSE	0.014	0.11			ADDB_MOUSE	0.038	-0.14
RL28_MOUSE	0.0095	0.21			IDHC_MOUSE	0.022	0.11			AP2M1_MOUSE	0.0028	-0.15
NFS1_MOUSE	0.013	0.21			PHB_MOUSE	0.024	0.11			PCLO_MOUSE	0.0058	-0.15
TTYH1_MOUSE	0.014	0.21			SET_MOUSE	0.026	0.11			GNAO_MOUSE	0.011	-0.15
PURA_MOUSE	0.015	0.21			LRP1_MOUSE	0.027	0.11			FA49B_MOUSE	0.019	-0.15
MIC26_MOUSE	0.017	0.21			S12A5_MOUSE	0.03	0.11			RTN1_MOUSE	0.023	-0.15
ACTN1_MOUSE	0.028	0.21			SYVC_MOUSE	0.047	0.11			SNAA_MOUSE	0.027	-0.15
GAK_MOUSE	0.029	0.21			AUXI_MOUSE	0.049	0.11			DLG2_MOUSE	0.041	-0.15
HINT2_MOUSE	0.03	0.21			ATPB_MOUSE	0.00094	0.1			GABT_MOUSE	0.0001	-0.16
CHM4B_MOUSE	0.049	0.21			SRCN1_MOUSE	0.0036	0.1			MDHC_MOUSE	0.00019	-0.16
THIL_MOUSE	0.0001	0.2			RL7A_MOUSE	0.022	0.1			GPDA_MOUSE	0.0022	-0.16
RS19_MOUSE	0.00084	0.2			TMOD2_MOUSE	0.022	0.1			NCDN_MOUSE	0.0038	-0.16
ODP2_MOUSE	0.0024	0.2			SYNC_MOUSE	0.031	0.1			OGT1_MOUSE	0.013	-0.16
ASNS_MOUSE	0.011	0.2			NDUA6_MOUSE	0.035	0.1			LGI1_MOUSE	0.026	-0.16
PSIP1_MOUSE	0.011	0.2			FLOT2_MOUSE	0.038	0.1			UBC12_MOUSE	0.031	-0.16
STX1A_MOUSE	0.014	0.2			BIN1_MOUSE	0.041	0.1			SYT2_MOUSE	0.038	-0.16
NACAM_MOUSE	0.019	0.2			GRB2_MOUSE	0.042	0.1			NPTN_MOUSE	0.041	-0.16
NEB2_MOUSE	0.021	0.2			FUMH_MOUSE	0.015	0.09			LANC1_MOUSE	0.041	-0.16
NPM_MOUSE	0.022	0.2			CN166_MOUSE	0.017	0.09			RAB14_MOUSE	0.001	-0.17
SYNRG_MOUSE	0.025	0.2			E41L3_MOUSE	0.0018	0.08			1433B_MOUSE	0.0023	-0.17
PPCEL_MOUSE	0.026	0.2			AT1A3_MOUSE	0.019	0.08			6PGL_MOUSE	0.013	-0.17
NAC2_MOUSE	0.028	0.2			PDIA3_MOUSE	0.021	0.08			VPS35_MOUSE	0.015	-0.17
DDX1_MOUSE	0.035	0.2			ATPA_MOUSE	0.041	0.08			LDHA_MOUSE	0.015	-0.17
LPPRC_MOUSE	0.037	0.2			GRP78_MOUSE	0.01	0.07			KLC1_MOUSE	0.036	-0.17
GRB2_MOUSE	0.00017	0.19			ACSL6_MOUSE	0.045	0.07			ITM2B_MOUSE	0.045	-0.17
ALDH2_MOUSE	0.00041	0.19			SPTN1_MOUSE	0.0001	-0.06			VDAC3_MOUSE	0.00035	-0.18
CEND_MOUSE	0.0017	0.19			DPYL2_MOUSE	0.0019	-0.07			BSN_MOUSE	0.00049	-0.18
NDUV2_MOUSE	0.0066	0.19			KPYM_MOUSE	0.0067	-0.07			STB5L_MOUSE	0.046	-0.18
RS3A_MOUSE	0.0069	0.19			UBA1_MOUSE	0.031	-0.07			NECP1_MOUSE	0.049	-0.18
VATF_MOUSE	0.011	0.19			TPIS_MOUSE	0.0082	-0.08			FSCN1_MOUSE	0.00084	-0.19
HDGR3_MOUSE	0.026	0.19			MDHC_MOUSE	0.036	-0.08			SFXN3_MOUSE	0.002	-0.19
MPPA_MOUSE	0.031	0.19			GABT_MOUSE	0.027	-0.09			KCC2B_MOUSE	0.013	-0.19
KCC2G_MOUSE	0.032	0.19			SPTB2_MOUSE	0.0001	-0.1			PSDE_MOUSE	0.028	-0.19
NDUA9_MOUSE	0.0015	0.18			ANK2_MOUSE	0.0011	-0.1			CTNA2_MOUSE	0.034	-0.19
ADT1_MOUSE	0.0018	0.18			HSP74_MOUSE	0.0035	-0.1			SEPT6_MOUSE	0.04	-0.19
PHB_MOUSE	0.005	0.18			SAHH_MOUSE	0.013	-0.1			KCRB_MOUSE	0.0001	-0.2
HYOU1_MOUSE	0.0092	0.18			LDHB_MOUSE	0.022	-0.1			CAP1_MOUSE	0.0072	-0.2
FUBP2_MOUSE	0.015	0.18			ALDOA_MOUSE	0.0024	-0.11			PP1R7_MOUSE	0.017	-0.2
QCR1_MOUSE	0.021	0.18			AL7A1_MOUSE	0.024	-0.11			UGPA_MOUSE	0.025	-0.2
CDC37_MOUSE	0.022	0.18			1433B_MOUSE	0.025	-0.11			ARPC2_MOUSE	0.032	-0.2
UBP14_MOUSE	0.024	0.18			SNAA_MOUSE	0.029	-0.11			SEP11_MOUSE	0.032	-0.2
SYJ2B_MOUSE	0.029	0.18			G6PI_MOUSE	0.019	-0.12			CSKP_MOUSE	0.004	-0.21
RBGP1_MOUSE	0.036	0.18			GDIR1_MOUSE	0.046	-0.12			NRX3A_MOUSE	0.0096	-0.21
ATP5I_MOUSE	0.04	0.18			ENOA_MOUSE	0.00012	-0.13			ARC1A_MOUSE	0.028	-0.21
CTNB1_MOUSE	0.04	0.18			LIS1_MOUSE	0.035	-0.13			GSH1_MOUSE	0.036	-0.21
PRPTZ_MOUSE	0.04	0.18			TRIM2_MOUSE	0.037	-0.13			CYFP2_MOUSE	0.042	-0.21
OXR1_MOUSE	0.0068	0.17			AT1A1_MOUSE	0.0016	-0.14			DOPD_MOUSE	0.0041	-0.22
DECR_MOUSE	0.0083	0.17			2AAA_MOUSE	0.0092	-0.14			SYT1_MOUSE	0.007	-0.22
RL3_MOUSE	0.01	0.17			PDXK_MOUSE	0.016	-0.14			1433T_MOUSE	0.0071	-0.22
GUAA_MOUSE	0.022	0.17			CAPZB_MOUSE	0.043	-0.14			SNP25_MOUSE	0.013	-0.22
ZO1_MOUSE	0.023	0.17			PROF1_MOUSE	0.0008	-0.15			CXA1_MOUSE	0.02	-0.22
RL7_MOUSE	0.024	0.17			NCDN_MOUSE	0.00085	-0.15			NCKP1_MOUSE	0.032	-0.22
AUHM_MOUSE	0.028	0.17			SYN1_MOUSE	0.00095	-0.15			C2C2L_MOUSE	0.012	-0.23
RS2_MOUSE	0.041	0.17			GPDA_MOUSE	0.022	-0.15			ESTD_MOUSE	0.012	-0.23
RL34_MOUSE	0.044	0.17			RPN2_MOUSE	0.044	-0.15			ERF1_MOUSE	0.014	-0.23
MTAP2_MOUSE	0.0001	0.16			G3P_MOUSE	0.00033	-0.16			1433Z_MOUSE	0.0009	-0.24
AP180_MOUSE	0.0019	0.16			VPS35_MOUSE	0.021	-0.16			PLCB1_MOUSE	0.002	-0.24
RLA2_MOUSE	0.0042	0.16			STXB1_MOUSE	0.0001	-0.17			PHF24_MOUSE	0.007	-0.24
S6A11_MOUSE	0.0049	0.16			BSN_MOUSE	0.00067	-0.17			L1CAM_MOUSE	0.013	-0.24
4F2_MOUSE	0.0064	0.16			PACS1_MOUSE	0.023	-0.17			KBTBB_MOUSE	0.028	-0.24
PDC6I_MOUSE	0.011	0.16			RAB8B_MOUSE	0.042	-0.17			GNB5_MOUSE	0.04	-0.24
GSTA4_MOUSE	0.014	0.16			DPYL1_MOUSE	0.0001	-0.18			ADA23_MOUSE	0.0053	-0.25
MACF1_MOUSE	0.017	0.16			VPP1_MOUSE	0.0001	-0.18			ADK_MOUSE	0.017	-0.25
AMPD2_MOUSE	0.019	0.16			AL1B1_MOUSE	0.018	-0.18			SYUA_MOUSE	0.028	-0.26
RTCB_MOUSE	0.021	0.16			KCRB_MOUSE	0.0001	-0.19			VA0D1_MOUSE	0.0063	-0.27
SPTB1_MOUSE	0.021	0.16			IMPA1_MOUSE	0.00036	-0.19			GBRB2_MOUSE	0.015	-0.27
MPP6_MOUSE	0.031	0.16			PLPP_MOUSE	0.0036	-0.19			SSBP_MOUSE	0.034	-0.27
MFR1L_MOUSE	0.041	0.16			CTNA2_MOUSE	0.041	-0.19			KIF5C_MOUSE	0.038	-0.27
SGTA_MOUSE	0.049	0.16			OGT1_MOUSE	0.0032	-0.2			KCJ10_MOUSE	0.0045	-0.29
S12A5_MOUSE	0.0038	0.15			SEPT5_MOUSE	0.0073	-0.2			RRAS2_MOUSE	0.035	-0.29
WDR1_MOUSE	0.012	0.15			VAT1L_MOUSE	0.019	-0.2			IMPA1_MOUSE	0.0001	-0.3
VISL1_MOUSE	0.018	0.15			TTC9A_MOUSE	0.02	-0.2			B3A3_MOUSE	0.046	-0.3
SRC8_MOUSE	0.023	0.15			PALM_MOUSE	0.039	-0.2			WIPI2_MOUSE	0.026	-0.31
ARMC6_MOUSE	0.036	0.15			PSA7_MOUSE	0.04	-0.2			RHG01_MOUSE	0.036	-0.32
SODM_MOUSE	0.036	0.15			PI42B_MOUSE	0.0016	-0.21			AL1A1_MOUSE	0.0001	-0.33
CDK5_MOUSE	0.045	0.15			DLG2_MOUSE	0.0074	-0.21			DCE2_MOUSE	0.0071	-0.33
PDIA6_MOUSE	0.045	0.15			ADA23_MOUSE	0.026	-0.21			DNJC5_MOUSE	0.046	-0.33
ERP29_MOUSE	0.049	0.15			VP26B_MOUSE	0.039	-0.21			CADM2_MOUSE	0.01	-0.34
SAC1_MOUSE	0.049	0.15			GIT1_MOUSE	0.041	-0.21			GBB1_MOUSE	0.0034	-0.35
MIC60_MOUSE	0.0001	0.14			EXOC4_MOUSE	0.045	-0.21			TOM70_MOUSE	0.009	-0.35
CSKI1_MOUSE	0.00076	0.14			RAB14_MOUSE	0.0001	-0.22			CSK2B_MOUSE	0.018	-0.35
F213A_MOUSE	0.0027	0.14			DOPD_MOUSE	0.0034	-0.22			SP16H_MOUSE	0.038	-0.37
NFASC_MOUSE	0.004	0.14			CSKP_MOUSE	0.0042	-0.22			KCNA1_MOUSE	0.014	-0.38
AUXI_MOUSE	0.011	0.14			KLC1_MOUSE	0.0044	-0.22			VIAAT_MOUSE	0.0006	-0.4
HMGB1_MOUSE	0.017	0.14			HECD3_MOUSE	0.016	-0.22			MP2K6_MOUSE	0.021	-0.41
PLXA4_MOUSE	0.02	0.14			ARP3_MOUSE	0.03	-0.22			ARP3B_MOUSE	0.037	-0.41
PCCA_MOUSE	0.023	0.14			ARC1A_MOUSE	0.036	-0.22			AT8A1_MOUSE	0.0001	-0.42
PSMD5_MOUSE	0.023	0.14			RTN1_MOUSE	0.00021	-0.23			GBB2_MOUSE	0.0026	-0.42
COX41_MOUSE	0.024	0.14			CYFP2_MOUSE	0.017	-0.23			AP1M1_MOUSE	0.047	-0.42
RS16_MOUSE	0.03	0.14			NCKP1_MOUSE	0.021	-0.23			BAIP2_MOUSE	0.0011	-0.43
ATPD_MOUSE	0.031	0.14			L1CAM_MOUSE	0.028	-0.23			GP158_MOUSE	0.00017	-0.45
LNEBL_MOUSE	0.035	0.14			LANC1_MOUSE	0.0041	-0.24			DDC_MOUSE	0.011	-0.47
CLIP2_MOUSE	0.043	0.14			SLK_MOUSE	0.0041	-0.24			CHIP_MOUSE	0.019	-0.47
HXK1_MOUSE	0.0001	0.13			STB5L_MOUSE	0.0054	-0.24			ADCY5_MOUSE	0.045	-0.47
ATPA_MOUSE	0.0011	0.13			KCC1D_MOUSE	0.0081	-0.24			PP2BA_MOUSE	0.00027	-0.48
CLH1_MOUSE	0.002	0.13			A4_MOUSE	0.01	-0.24			KPCB_MOUSE	0.00059	-0.48
CH10_MOUSE	0.0044	0.13			KINH_MOUSE	0.01	-0.24			ACSL3_MOUSE	0.0082	-0.51
ETFB_MOUSE	0.0074	0.13			TY3H_MOUSE	0.029	-0.24			PDE1B_MOUSE	0.00058	-0.56
CA2D1_MOUSE	0.024	0.13			PCLO_MOUSE	0.0001	-0.25			GFAP_MOUSE	0.0082	-0.58
ECHM_MOUSE	0.027	0.13			SEP11_MOUSE	0.013	-0.25			PTN5_MOUSE	0.031	-0.58
CN166_MOUSE	0.031	0.13			SIK3_MOUSE	0.021	-0.25			CANB1_MOUSE	0.0017	-0.59
ATP5H_MOUSE	0.035	0.13			PHF24_MOUSE	0.0068	-0.26			PGAM2_MOUSE	0.04	-0.6
MMSA_MOUSE	0.04	0.13			STRN_MOUSE	0.019	-0.26			SYT12_MOUSE	0.045	-0.6
SYTC_MOUSE	0.046	0.13			ARPC5_MOUSE	0.033	-0.26			NECA2_MOUSE	0.00043	-0.64
QCR2_MOUSE	0.012	0.12			ARPC3_MOUSE	0.034	-0.26			PDE2A_MOUSE	0.0001	-0.69
IVD_MOUSE	0.025	0.12			CTBP1_MOUSE	0.0021	-0.27			TY3H_MOUSE	0.0001	-0.72
1433F_MOUSE	0.03	0.12			RPGF4_MOUSE	0.0029	-0.27			SYT6_MOUSE	0.0011	-0.87
DMXL2_MOUSE	0.031	0.12			VA0D1_MOUSE	0.0046	-0.27			PPR1B_MOUSE	0.018	-0.97
GNAZ_MOUSE	0.037	0.12			PSMD7_MOUSE	0.038	-0.27			PP1B_MOUSE	0.011	-1.08
PICAL_MOUSE	0.043	0.12			ARP2_MOUSE	0.0001	-0.28			PDE10_MOUSE	0.00011	-1.12
LETM1_MOUSE	0.045	0.12			ARPC2_MOUSE	0.00031	-0.28
OTUB1_MOUSE	0.045	0.12			SYT1_MOUSE	0.0017	-0.28
PABP1_MOUSE	0.046	0.12			LGI1_MOUSE	0.01	-0.28
AP3B2_MOUSE	0.0029	0.11			PADI2_MOUSE	0.012	-0.28
AP2B1_MOUSE	0.0032	0.11			ABI1_MOUSE	0.013	-0.28
DYN1_MOUSE	0.0084	0.11			MLC1_MOUSE	0.043	-0.28
ECHA_MOUSE	0.017	0.11			NEUM_MOUSE	0.0001	-0.29
PFKAL_MOUSE	0.035	0.11			GTR3_MOUSE	0.0034	-0.29
PHB2_MOUSE	0.037	0.11			SPEE_MOUSE	0.016	-0.29
VATB2_MOUSE	0.0041	0.1			GPM6A_MOUSE	0.017	-0.29
NDUA6_MOUSE	0.016	0.1			IPP2_MOUSE	0.029	-0.29
RL23A_MOUSE	0.024	0.1			TOM70_MOUSE	0.041	-0.29
SNX6_MOUSE	0.035	0.1			FSCN1_MOUSE	0.0001	-0.31
AL1L1_MOUSE	0.037	0.1			PLCB1_MOUSE	0.0001	-0.31
SDHA_MOUSE	0.038	0.1			GSH1_MOUSE	0.0001	-0.31
PDIA3_MOUSE	0.041	0.1			DNJC5_MOUSE	0.0082	-0.31
QCR7_MOUSE	0.041	0.1			SCAM1_MOUSE	0.019	-0.31
IDHC_MOUSE	0.044	0.1			TPD52_MOUSE	0.022	-0.31
CAND1_MOUSE	0.01	0.09			SNG3_MOUSE	0.03	-0.31
ODO1_MOUSE	0.045	0.09			SYN3_MOUSE	0.033	-0.31
AK1A1_MOUSE	0.047	0.09			AMPB_MOUSE	0.0001	-0.32
THIO_MOUSE	0.039	0.08			TPM1_MOUSE	0.0025	-0.32
FUMH_MOUSE	0.041	0.08			MYL6_MOUSE	0.007	-0.32
EFTU_MOUSE	0.044	0.08			DCE1_MOUSE	0.0094	-0.32
SYNJ1_MOUSE	0.046	0.08			ACY1_MOUSE	0.015	-0.32
UBA1_MOUSE	0.018	0.07			ITPA_MOUSE	0.032	-0.32
MAP6_MOUSE	0.038	0.05			LDHA_MOUSE	0.0001	-0.33
MAP1A_MOUSE	0.0073	-0.07			GPX1_MOUSE	0.01	-0.33
SPTN1_MOUSE	0.0001	-0.08			PROD_MOUSE	0.016	-0.33
KPYM_MOUSE	0.0035	-0.08			1433Z_MOUSE	0.0001	-0.34
ANK2_MOUSE	0.018	-0.08			CXA1_MOUSE	0.005	-0.34
DPYL2_MOUSE	0.0024	-0.09			SKP1_MOUSE	0.0017	-0.35
STX1B_MOUSE	0.036	-0.09			CALM3_MOUSE	0.006	-0.35
SPTB2_MOUSE	0.0001	-0.1			CAP2_MOUSE	0.0064	-0.35
PROF1_MOUSE	0.035	-0.1			SCAM3_MOUSE	0.019	-0.35
STXB1_MOUSE	0.00075	-0.12			MP2K6_MOUSE	0.045	-0.35
IPYR_MOUSE	0.014	-0.12			CADM2_MOUSE	0.0081	-0.36
E41L1_MOUSE	0.024	-0.12			PP1R7_MOUSE	0.0001	-0.38
E41L2_MOUSE	0.042	-0.12			C1QC_MOUSE	0.0039	-0.38
GNAO_MOUSE	0.047	-0.12			MYCB2_MOUSE	0.036	-0.39
DPYL1_MOUSE	0.011	-0.13			MP2K1_MOUSE	0.0002	-0.4
ARPC2_MOUSE	0.041	-0.13			HPCL4_MOUSE	0.015	-0.4
ARP2_MOUSE	0.047	-0.13			WDR47_MOUSE	0.011	-0.41
MDHC_MOUSE	0.0012	-0.14			RHG01_MOUSE	0.043	-0.41
PURA1_MOUSE	0.035	-0.14			CRIP2_MOUSE	0.043	-0.41
CAH2_MOUSE	0.013	-0.15			KCC2B_MOUSE	0.0001	-0.42
CNTN2_MOUSE	0.027	-0.15			CAP1_MOUSE	0.0001	-0.42
G3P_MOUSE	0.0013	-0.16			AQP4_MOUSE	0.0011	-0.42
OGT1_MOUSE	0.0051	-0.16			C2C2L_MOUSE	0.0001	-0.43
IMPA1_MOUSE	0.0017	-0.17			VIAAT_MOUSE	0.0001	-0.43
BCAS1_MOUSE	0.011	-0.17			KCJ10_MOUSE	0.0014	-0.43
SCRN1_MOUSE	0.023	-0.17			SYUA_MOUSE	0.0023	-0.43
CN37_MOUSE	0.00042	-0.18			ZNT1_MOUSE	0.04	-0.43
RAB14_MOUSE	0.0011	-0.18			AT8A1_MOUSE	0.0001	-0.47
1433Z_MOUSE	0.0028	-0.18			MPP3_MOUSE	0.0026	-0.47
G6PI_MOUSE	0.0034	-0.18			WASF1_MOUSE	0.00095	-0.49
PARK7_MOUSE	0.0076	-0.18			CC50A_MOUSE	0.0023	-0.49
PUR8_MOUSE	0.016	-0.18			CHAP1_MOUSE	0.036	-0.49
AMPB_MOUSE	0.024	-0.18			CHIP_MOUSE	0.036	-0.49
PHF24_MOUSE	0.027	-0.18			KPCG_MOUSE	0.00014	-0.52
KLC1_MOUSE	0.034	-0.18			KCC4_MOUSE	0.016	-0.52
ILEUA_MOUSE	0.041	-0.18			KCC2A_MOUSE	0.0001	-0.53
MYO1D_MOUSE	0.042	-0.18			VPS50_MOUSE	0.036	-0.53
LDHB_MOUSE	0.0001	-0.19			DPP3_MOUSE	0.02	-0.54
TBB3_MOUSE	0.0001	-0.19			SCN2B_MOUSE	0.048	-0.54
SYUG_MOUSE	0.0061	-0.19			SYT6_MOUSE	0.015	-0.55
A4_MOUSE	0.022	-0.19			DCE2_MOUSE	0.0001	-0.56
CXA1_MOUSE	0.038	-0.19			GUAD_MOUSE	0.0001	-0.59
BASP1_MOUSE	0.0037	-0.2			KCD12_MOUSE	0.037	-0.63
KCC1D_MOUSE	0.037	-0.2			CPLX2_MOUSE	0.0075	-0.64
DLG2_MOUSE	0.0018	-0.21			CA2D3_MOUSE	0.009	-0.66
KCC2B_MOUSE	0.0026	-0.21			K1107_MOUSE	0.03	-0.66
ADA22_MOUSE	0.034	-0.21			CANB1_MOUSE	0.00017	-0.67
KCRB_MOUSE	0.0001	-0.22			CRYM_MOUSE	0.00017	-0.68
TTC9A_MOUSE	0.0063	-0.22			BCR_MOUSE	0.0022	-0.68
GSH1_MOUSE	0.0086	-0.22			PCP4_MOUSE	0.0093	-0.68
PALM_MOUSE	0.013	-0.22			PP2BA_MOUSE	0.0001	-0.69
ABHGA_MOUSE	0.049	-0.22			GP158_MOUSE	0.0001	-0.7
NFM_MOUSE	0.0001	-0.23			KPCB_MOUSE	0.0001	-0.74
CTL1_MOUSE	0.01	-0.23			SYT12_MOUSE	0.01	-0.74
GSTM7_MOUSE	0.037	-0.24			NECA2_MOUSE	0.00014	-0.76
CAP1_MOUSE	0.0029	-0.25			PGAM2_MOUSE	0.016	-0.76
ITM2B_MOUSE	0.0057	-0.26			BAIP2_MOUSE	0.0001	-0.85
TOM70_MOUSE	0.019	-0.26			CBR3_MOUSE	0.0099	-0.86
GPDA_MOUSE	0.0022	-0.27			PHAR1_MOUSE	0.018	-0.87
NEUM_MOUSE	0.0001	-0.28			PDE1B_MOUSE	0.0001	-0.93
STRN_MOUSE	0.016	-0.28			PTN5_MOUSE	0.0006	-0.94
RTN1_MOUSE	0.00014	-0.29			GPM6B_MOUSE	0.018	-1
PYGM_MOUSE	0.00038	-0.29			ADCY5_MOUSE	0.0001	-1.04
PLCB1_MOUSE	0.00054	-0.29			GFAP_MOUSE	0.0001	-1.2
MARCS_MOUSE	0.0053	-0.29			SRR_MOUSE	0.0036	-1.23
KBTBB_MOUSE	0.0079	-0.3			NSMA2_MOUSE	0.00046	-1.28
RHG01_MOUSE	0.043	-0.3			PDE2A_MOUSE	0.0001	-1.32
CSK2B_MOUSE	0.011	-0.31			PPR1B_MOUSE	0.00047	-1.47
VIAAT_MOUSE	0.012	-0.31			PDE10_MOUSE	0.0001	-1.82
RRAS2_MOUSE	0.039	-0.31
FSCN1_MOUSE	0.0001	-0.32
AT8A1_MOUSE	0.0001	-0.34
PP1R7_MOUSE	0.00023	-0.34
CLD11_MOUSE	0.0013	-0.34
IPP2_MOUSE	0.025	-0.34
C2C2L_MOUSE	0.0007	-0.35
ADA23_MOUSE	0.0035	-0.35
ABI1_MOUSE	0.0071	-0.35
MP2K6_MOUSE	0.019	-0.36
CPLX1_MOUSE	0.027	-0.36
MYPR_MOUSE	0.00061	-0.37
CALM3_MOUSE	0.011	-0.37
ENPP6_MOUSE	0.0001	-0.38
AQP4_MOUSE	0.0039	-0.38
MOBP_MOUSE	0.025	-0.39
AL1A1_MOUSE	0.0001	-0.4
ANLN_MOUSE	0.025	-0.41
SCN8A_MOUSE	0.036	-0.41
DCE2_MOUSE	0.00043	-0.42
CRYM_MOUSE	0.0089	-0.43
B3A3_MOUSE	0.011	-0.45
C99L2_MOUSE	0.033	-0.45
PLIN3_MOUSE	0.015	-0.46
NECA2_MOUSE	0.016	-0.46
CC50A_MOUSE	0.0061	-0.47
PP2BA_MOUSE	0.0001	-0.51
KCNA1_MOUSE	0.035	-0.51
KCC4_MOUSE	0.012	-0.52
SYT6_MOUSE	0.012	-0.54
CANB1_MOUSE	0.0013	-0.57
CPLX2_MOUSE	0.023	-0.57
PCP4_MOUSE	0.023	-0.57
BAIP2_MOUSE	0.0001	-0.58
MPP3_MOUSE	0.00023	-0.58
BCR_MOUSE	0.00082	-0.58
GP158_MOUSE	0.0001	-0.6
AL1A7_MOUSE	0.036	-0.61
ACY1_MOUSE	0.0003	-0.62
DDC_MOUSE	0.0019	-0.63
SYT12_MOUSE	0.027	-0.64
KPCB_MOUSE	0.0001	-0.69
PADI2_MOUSE	0.0001	-0.71
PDE1B_MOUSE	0.0001	-0.75
ADCY5_MOUSE	0.0016	-0.8
PTN5_MOUSE	0.0025	-0.85
TY3H_MOUSE	0.0001	-0.92
GPM6B_MOUSE	0.019	-0.92
NSMA2_MOUSE	0.0081	-0.95
GFAP_MOUSE	0.0001	-1.03
PDE2A_MOUSE	0.0001	-1.09
PPR1B_MOUSE	0.0008	-1.68
PDE10_MOUSE	0.0001	-1.74

## Sheet: S2 Downstream from FMRP
Symbol	Entrez Gene Name	UniProt Accession	Expr p-value	Expr Log Ratio	Location	Family
PDE2A	phosphodiesterase 2A	PDE2A_MOUSE	0.0001	-1.09	Cytoplasm	enzyme
GFAP	glial fibrillary acidic protein	GFAP_MOUSE	0.0001	-1.03	Cytoplasm	other
TH	tyrosine hydroxylase	TY3H_MOUSE	0.0001	-0.92	Cytoplasm	enzyme
PRKCB	protein kinase C beta	KPCB_MOUSE	0.0001	-0.69	Cytoplasm	kinase
BAIAP2	BAI1 associated protein 2	BAIP2_MOUSE	0.0001	-0.58	Plasma Membrane	kinase
SYT6	synaptotagmin 6	SYT6_MOUSE	0.012	-0.54	Cytoplasm	transporter
PPP3CA	protein phosphatase 3 catalytic subunit alpha	PP2BA_MOUSE	0.0001	-0.51	Cytoplasm	phosphatase
ANLN	anillin actin binding protein	ANLN_MOUSE	0.025	-0.41	Cytoplasm	other
Calm1 (includes others)	calmodulin 1	CALM3_MOUSE	0.011	-0.37	Nucleus	other
ABI1	abl interactor 1	ABI1_MOUSE	0.0071	-0.35	Cytoplasm	other
Marcks	myristoylated alanine rich protein kinase C substrate	MARCS_MOUSE	0.0053	-0.29	Plasma Membrane	other
PLCB1	phospholipase C beta 1	PLCB1_MOUSE	0.00054	-0.29	Cytoplasm	enzyme
GAP43	growth associated protein 43	NEUM_MOUSE	0.0001	-0.28	Plasma Membrane	other
STRN	striatin	STRN_MOUSE	0.016	-0.28	Cytoplasm	other
Nefm	neurofilament, medium polypeptide	NFM_MOUSE	0.0001	-0.23	Plasma Membrane	other
CKB	creatine kinase B	KCRB_MOUSE	0.0001	-0.22	Cytoplasm	kinase
CAMK2B	calcium/calmodulin dependent protein kinase II beta	KCC2B_MOUSE	0.0026	-0.21	Cytoplasm	kinase
DLG2	discs large MAGUK scaffold protein 2	DLG2_MOUSE	0.0018	-0.21	Plasma Membrane	kinase
BASP1	brain abundant membrane attached signal protein 1	BASP1_MOUSE	0.0037	-0.2	Nucleus	transcription regulator
APP	amyloid beta precursor protein	A4_MOUSE	0.022	-0.19	Plasma Membrane	other
GJA1	gap junction protein alpha 1	CXA1_MOUSE	0.038	-0.19	Plasma Membrane	transporter
TUBB3	tubulin beta 3 class III	TBB3_MOUSE	0.0001	-0.19	Cytoplasm	other
KLC1	kinesin light chain 1	KLC1_MOUSE	0.034	-0.18	Cytoplasm	other
PARK7	Parkinsonism associated deglycase	PARK7_MOUSE	0.0076	-0.18	Nucleus	enzyme
YWHAZ	tyrosine 3-monooxygenase/tryptophan 5-monooxygenase activation protein zeta	1433Z_MOUSE	0.0028	-0.18	Cytoplasm	enzyme
GAPDH	glyceraldehyde-3-phosphate dehydrogenase	G3P_MOUSE	0.0013	-0.16	Cytoplasm	enzyme
OGT	O-linked N-acetylglucosamine (GlcNAc) transferase	OGT1_MOUSE	0.0051	-0.16	Cytoplasm	enzyme
CRMP1	collapsin response mediator protein 1	DPYL1_MOUSE	0.011	-0.13	Cytoplasm	enzyme
EPB41L2	erythrocyte membrane protein band 4.1 like 2	E41L2_MOUSE	0.042	-0.12	Plasma Membrane	other
GNAO1	G protein subunit alpha o1	GNAO_MOUSE	0.047	-0.12	Plasma Membrane	enzyme
STXBP1	syntaxin binding protein 1	STXB1_MOUSE	0.00075	-0.12	Cytoplasm	transporter
PFN1	profilin 1	PROF1_MOUSE	0.035	-0.1	Cytoplasm	other
SPTBN1	spectrin beta, non-erythrocytic 1	SPTB2_MOUSE	0.0001	-0.1	Plasma Membrane	other
DPYSL2	dihydropyrimidinase like 2	DPYL2_MOUSE	0.0024	-0.09	Cytoplasm	enzyme
STX1B	syntaxin 1B	STX1B_MOUSE	0.036	-0.09	Plasma Membrane	other
SPTAN1	spectrin alpha, non-erythrocytic 1	SPTN1_MOUSE	0.0001	-0.08	Plasma Membrane	other
MAP1A	microtubule associated protein 1A	MAP1A_MOUSE	0.0073	-0.07	Cytoplasm	other
UBA1	ubiquitin like modifier activating enzyme 1	UBA1_MOUSE	0.018	0.07	Cytoplasm	enzyme
SYNJ1	synaptojanin 1	SYNJ1_MOUSE	0.046	0.08	Cytoplasm	phosphatase
TXN	thioredoxin	THIO_MOUSE	0.039	0.08	Cytoplasm	enzyme
CAND1	cullin associated and neddylation dissociated 1	CAND1_MOUSE	0.01	0.09	Cytoplasm	transcription regulator
OGDH	oxoglutarate dehydrogenase	ODO1_MOUSE	0.045	0.09	Cytoplasm	enzyme
SDHA	succinate dehydrogenase complex flavoprotein subunit A	SDHA_MOUSE	0.038	0.1	Cytoplasm	enzyme
Ap2b1	adaptor-related protein complex 2, beta 1 subunit	AP2B1_MOUSE	0.0032	0.11	Plasma Membrane	other
DNM1	dynamin 1	DYN1_MOUSE	0.0084	0.11	Cytoplasm	enzyme
PHB2	prohibitin 2	PHB2_MOUSE	0.037	0.11	Cytoplasm	transcription regulator
DMXL2	Dmx like 2	DMXL2_MOUSE	0.031	0.12	Cytoplasm	other
GNAZ	G protein subunit alpha z	GNAZ_MOUSE	0.037	0.12	Plasma Membrane	enzyme
PABPC1	poly(A) binding protein cytoplasmic 1	PABP1_MOUSE	0.046	0.12	Cytoplasm	translation regulator
YWHAH	tyrosine 3-monooxygenase/tryptophan 5-monooxygenase activation protein eta	1433F_MOUSE	0.03	0.12	Cytoplasm	transcription regulator
CLTC	clathrin heavy chain	CLH1_MOUSE	0.002	0.13	Plasma Membrane	other
HK1	hexokinase 1	HXK1_MOUSE	0.0001	0.13	Cytoplasm	kinase
CASKIN1	CASK interacting protein 1	CSKI1_MOUSE	0.00076	0.14	Nucleus	transcription regulator
DNAJC6	DnaJ heat shock protein family (Hsp40) member C6	AUXI_MOUSE	0.011	0.14	Cytoplasm	other
RPS16	ribosomal protein S16	RS16_MOUSE	0.03	0.14	Cytoplasm	other
CDK5	cyclin dependent kinase 5	CDK5_MOUSE	0.045	0.15	Nucleus	kinase
CTTN	cortactin	SRC8_MOUSE	0.023	0.15	Plasma Membrane	other
SOD2	superoxide dismutase 2	SODM_MOUSE	0.036	0.15	Cytoplasm	enzyme
Macf1	microtubule-actin crosslinking factor 1	MACF1_MOUSE	0.017	0.16	Cytoplasm	enzyme
MAP2	microtubule associated protein 2	MTAP2_MOUSE	0.0001	0.16	Plasma Membrane	other
MPP6	membrane palmitoylated protein 6	MPP6_MOUSE	0.031	0.16	Plasma Membrane	kinase
RPLP2	ribosomal protein lateral stalk subunit P2	RLA2_MOUSE	0.0042	0.16	Cytoplasm	other
RTCB	RNA 2',3'-cyclic phosphate and 5'-OH ligase	RTCB_MOUSE	0.021	0.16	Cytoplasm	enzyme
SNAP91	synaptosome associated protein 91	AP180_MOUSE	0.0019	0.16	Plasma Membrane	other
SPTB	spectrin beta, erythrocytic	SPTB1_MOUSE	0.021	0.16	Plasma Membrane	other
RPL3	ribosomal protein L3	RL3_MOUSE	0.01	0.17	Nucleus	other
TJP1	tight junction protein 1	ZO1_MOUSE	0.023	0.17	Plasma Membrane	other
CTNNB1	catenin beta 1	CTNB1_MOUSE	0.04	0.18	Nucleus	transcription regulator
KHSRP	KH-type splicing regulatory protein	FUBP2_MOUSE	0.015	0.18	Nucleus	enzyme
PTPRZ1	protein tyrosine phosphatase, receptor type Z1	PRPTZ_MOUSE	0.04	0.18	Plasma Membrane	phosphatase
UQCRC1	ubiquinol-cytochrome c reductase core protein 1	QCR1_MOUSE	0.021	0.18	Cytoplasm	enzyme
ATP6V1F	ATPase H+ transporting V1 subunit F	VATF_MOUSE	0.011	0.19	Cytoplasm	enzyme
CAMK2G	calcium/calmodulin dependent protein kinase II gamma	KCC2G_MOUSE	0.032	0.19	Cytoplasm	kinase
GRB2	growth factor receptor bound protein 2	GRB2_MOUSE	0.00017	0.19	Cytoplasm	kinase
DDX1	DEAD-box helicase 1	DDX1_MOUSE	0.035	0.2	Nucleus	enzyme
RPS19	ribosomal protein S19	RS19_MOUSE	0.00084	0.2	Cytoplasm	other
STX1A	syntaxin 1A	STX1A_MOUSE	0.014	0.2	Cytoplasm	transporter
EIF3A	eukaryotic translation initiation factor 3 subunit A	EIF3A_MOUSE	0.00034	0.21	Cytoplasm	other
PSPC1	paraspeckle component 1	PSPC1_MOUSE	0.0031	0.21	Nucleus	other
PURA	purine rich element binding protein A	PURA_MOUSE	0.015	0.21	Nucleus	transcription regulator
AMPH	amphiphysin	AMPH_MOUSE	0.0001	0.22	Plasma Membrane	other
DBN1	drebrin 1	DREB_MOUSE	0.0013	0.22	Cytoplasm	other
FECH	ferrochelatase	HEMH_MOUSE	0.045	0.22	Cytoplasm	enzyme
H2AFX	H2A histone family member X	H2AX_MOUSE	0.0067	0.22	Nucleus	transcription regulator
HNRNPA2B1	heterogeneous nuclear ribonucleoprotein A2/B1	ROA2_MOUSE	0.00017	0.22	Nucleus	other
HNRNPC	heterogeneous nuclear ribonucleoprotein C (C1/C2)	HNRPC_MOUSE	0.0047	0.22	Nucleus	other
HSPA5	heat shock protein family A (Hsp70) member 5	GRP78_MOUSE	0.0001	0.22	Cytoplasm	enzyme
PAK1	p21 (RAC1) activated kinase 1	PAK1_MOUSE	0.0036	0.22	Cytoplasm	kinase
RPL7A	ribosomal protein L7a	RL7A_MOUSE	0.0001	0.22	Cytoplasm	other
SYNCRIP	synaptotagmin binding cytoplasmic RNA interacting protein	HNRPQ_MOUSE	0.00039	0.22	Nucleus	other
CORO1C	coronin 1C	COR1C_MOUSE	0.0069	0.23	Cytoplasm	other
HNRNPU	heterogeneous nuclear ribonucleoprotein U	HNRPU_MOUSE	0.0028	0.23	Nucleus	transporter
SFPQ	splicing factor proline and glutamine rich	SFPQ_MOUSE	0.0057	0.23	Nucleus	other
RPL31	ribosomal protein L31	RL31_MOUSE	0.00066	0.24	Cytoplasm	other
VCL	vinculin	VINC_MOUSE	0.0037	0.24	Plasma Membrane	enzyme
DDX17	DEAD-box helicase 17	DDX17_MOUSE	0.046	0.25	Nucleus	enzyme
HNRNPK	heterogeneous nuclear ribonucleoprotein K	HNRPK_MOUSE	0.0019	0.25	Nucleus	transcription regulator
NCL	nucleolin	NUCL_MOUSE	0.0001	0.26	Nucleus	other
PTPRA	protein tyrosine phosphatase, receptor type A	PTPRA_MOUSE	0.033	0.26	Plasma Membrane	phosphatase
ACTN4	actinin alpha 4	ACTN4_MOUSE	0.0036	0.27	Cytoplasm	transcription regulator
FXR1	FMR1 autosomal homolog 1	FXR1_MOUSE	0.01	0.27	Cytoplasm	other
GORASP2	golgi reassembly stacking protein 2	GORS2_MOUSE	0.038	0.27	Cytoplasm	other
HNRNPL	heterogeneous nuclear ribonucleoprotein L	HNRPL_MOUSE	0.0062	0.27	Nucleus	other
SERBP1	SERPINE1 mRNA binding protein 1	PAIRB_MOUSE	0.0001	0.27	Cytoplasm	other
SF3B3	splicing factor 3b subunit 3	SF3B3_MOUSE	0.025	0.27	Nucleus	other
FLOT2	flotillin 2	FLOT2_MOUSE	0.0001	0.28	Plasma Membrane	other
ITSN1	intersectin 1	ITSN1_MOUSE	0.0011	0.28	Cytoplasm	other
AP1B1	adaptor related protein complex 1 beta 1 subunit	AP1B1_MOUSE	0.0001	0.29	Cytoplasm	transporter
H2AFY	H2A histone family member Y	H2AY_MOUSE	0.0001	0.29	Nucleus	other
ILF3	interleukin enhancer binding factor 3	ILF3_MOUSE	0.0025	0.29	Nucleus	transcription regulator
PRKAR2B	protein kinase cAMP-dependent type II regulatory subunit beta	KAP3_MOUSE	0.00028	0.29	Cytoplasm	kinase
Hnrnpa3	heterogeneous nuclear ribonucleoprotein A3	ROA3_MOUSE	0.0001	0.3	Nucleus	transporter
ZFR	zinc finger RNA binding protein	ZFR_MOUSE	0.03	0.3	Nucleus	other
CAMK2D	calcium/calmodulin dependent protein kinase II delta	KCC2D_MOUSE	0.0001	0.31	Cytoplasm	kinase
ATP2B4	ATPase plasma membrane Ca2+ transporting 4	AT2B4_MOUSE	0.005	0.32	Plasma Membrane	transporter
G3BP2	G3BP stress granule assembly factor 2	G3BP2_MOUSE	0.039	0.32	Cytoplasm	enzyme
LMNA	lamin A/C	LMNA_MOUSE	0.0001	0.32	Nucleus	other
SET	SET nuclear proto-oncogene	SET_MOUSE	0.0001	0.32	Nucleus	phosphatase
DLG3	discs large MAGUK scaffold protein 3	DLG3_MOUSE	0.0032	0.33	Plasma Membrane	kinase
LASP1	LIM and SH3 protein 1	LASP1_MOUSE	0.00085	0.33	Cytoplasm	transporter
LMNB1	lamin B1	LMNB1_MOUSE	0.0001	0.33	Nucleus	other
TRIM28	tripartite motif containing 28	TIF1B_MOUSE	0.026	0.33	Nucleus	transcription regulator
HP1BP3	heterochromatin protein 1 binding protein 3	HP1B3_MOUSE	0.00086	0.34	Nucleus	other
MSN	moesin	MOES_MOUSE	0.014	0.35	Plasma Membrane	other
RALY	RALY heterogeneous nuclear ribonucleoprotein	RALY_MOUSE	0.039	0.35	Nucleus	transcription regulator
MECP2	methyl-CpG binding protein 2	MECP2_MOUSE	0.0001	0.36	Nucleus	transcription regulator
MYH9	myosin heavy chain 9	MYH9_MOUSE	0.00022	0.36	Cytoplasm	enzyme
PTBP2	polypyrimidine tract binding protein 2	PTBP2_MOUSE	0.0028	0.36	Nucleus	other
SHANK1	SH3 and multiple ankyrin repeat domains 1	SHAN1_MOUSE	0.045	0.36	Cytoplasm	other
TPR	translocated promoter region, nuclear basket protein	TPR_MOUSE	0.029	0.36	Nucleus	other
MATR3	matrin 3	MATR3_MOUSE	0.0001	0.37	Nucleus	other
NOS1	nitric oxide synthase 1	NOS1_MOUSE	0.0013	0.37	Cytoplasm	enzyme
SSB	Sjogren syndrome antigen B	LA_MOUSE	0.044	0.37	Nucleus	enzyme
FLOT1	flotillin 1	FLOT1_MOUSE	0.0001	0.38	Plasma Membrane	other
SEPT9	septin 9	SEPT9_MOUSE	0.00055	0.38	Cytoplasm	enzyme
ARVCF	ARVCF, delta catenin family member	ARVC_MOUSE	0.00097	0.39	Plasma Membrane	other
Fus	fused in sarcoma	FUS_MOUSE	0.0001	0.39	Nucleus	transcription regulator
GPRIN1	G protein regulated inducer of neurite outgrowth 1	GRIN1_MOUSE	0.0001	0.39	Plasma Membrane	other
RANGAP1	Ran GTPase activating protein 1	RAGP1_MOUSE	0.013	0.39	Nucleus	other
CCAR2	cell cycle and apoptosis regulator 2	CCAR2_MOUSE	0.01	0.4	Cytoplasm	peptidase
APEX1	apurinic/apyrimidinic endodeoxyribonuclease 1	APEX1_MOUSE	0.0058	0.42	Nucleus	enzyme
RBM14	RNA binding motif protein 14	RBM14_MOUSE	0.0013	0.42	Nucleus	transcription regulator
FAM120A	family with sequence similarity 120A	F120A_MOUSE	0.0014	0.45	Cytoplasm	other
DLGAP3	DLG associated protein 3	DLGP3_MOUSE	0.015	0.46	Cytoplasm	other
KHDRBS3	KH RNA binding domain containing, signal transduction associated 3	KHDR3_MOUSE	0.00094	0.46	Nucleus	other
LRPAP1	LDL receptor related protein associated protein 1	AMRP_MOUSE	0.0063	0.46	Plasma Membrane	other
BRSK1	BR serine/threonine kinase 1	BRSK1_MOUSE	0.028	0.48	Cytoplasm	kinase
HNRNPM	heterogeneous nuclear ribonucleoprotein M	HNRPM_MOUSE	0.021	0.51	Nucleus	other
RASGRF2	Ras protein specific guanine nucleotide releasing factor 2	RGRF2_MOUSE	0.0062	0.55	Cytoplasm	other
CPSF6	cleavage and polyadenylation specific factor 6	CPSF6_MOUSE	0.021	0.58	Nucleus	other
VIM	vimentin	VIME_MOUSE	0.0001	0.62	Cytoplasm	other
SYNGAP1	synaptic Ras GTPase activating protein 1	SYGP1_MOUSE	0.00086	0.63	Plasma Membrane	other
ANXA2	annexin A2	ANXA2_MOUSE	0.045	0.65	Plasma Membrane	other
HAP1	huntingtin associated protein 1	HAP1_MOUSE	0.0005	0.71	Cytoplasm	other
SORBS2	sorbin and SH3 domain containing 2	SRBS2_MOUSE	0.003	0.81	Plasma Membrane	other
FLNA	filamin A	FLNA_MOUSE	0.0001	0.86	Cytoplasm	other
FLNB	filamin B	FLNB_MOUSE	0.0095	1.29	Cytoplasm	other
FMR1	fragile X mental retardation 1				Cytoplasm	translation regulator

## Sheet: S3 Downstream from mTOR
Symbol	Entrez Gene Name	UniProt Accession	Expr p-value	Expr Log Ratio	Location	Family
GFAP	glial fibrillary acidic protein	GFAP_MOUSE	0.0001	-1.03	Cytoplasm	other
PRKCB	protein kinase C beta	KPCB_MOUSE	0.0001	-0.69	Cytoplasm	kinase
BAIAP2	BAI1 associated protein 2	BAIP2_MOUSE	0.0001	-0.58	Plasma Membrane	kinase
ANLN	anillin actin binding protein	ANLN_MOUSE	0.025	-0.41	Cytoplasm	other
PLCB1	phospholipase C beta 1	PLCB1_MOUSE	0.00054	-0.29	Cytoplasm	enzyme
ADAM22	ADAM metallopeptidase domain 22	ADA22_MOUSE	0.034	-0.21	Plasma Membrane	peptidase
APP	amyloid beta precursor protein	A4_MOUSE	0.022	-0.19	Plasma Membrane	other
GJA1	gap junction protein alpha 1	CXA1_MOUSE	0.038	-0.19	Plasma Membrane	transporter
GPI	glucose-6-phosphate isomerase	G6PI_MOUSE	0.0034	-0.18	Extracellular Space	enzyme
PARK7	Parkinsonism associated deglycase	PARK7_MOUSE	0.0076	-0.18	Nucleus	enzyme
YWHAZ	tyrosine 3-monooxygenase/tryptophan 5-monooxygenase activation protein zeta	1433Z_MOUSE	0.0028	-0.18	Cytoplasm	enzyme
GAPDH	glyceraldehyde-3-phosphate dehydrogenase	G3P_MOUSE	0.0013	-0.16	Cytoplasm	enzyme
STXBP1	syntaxin binding protein 1	STXB1_MOUSE	0.00075	-0.12	Cytoplasm	transporter
SPTBN1	spectrin beta, non-erythrocytic 1	SPTB2_MOUSE	0.0001	-0.1	Plasma Membrane	other
STX1B	syntaxin 1B	STX1B_MOUSE	0.036	-0.09	Plasma Membrane	other
Ank2	ankyrin 2, brain	ANK2_MOUSE	0.018	-0.08	Plasma Membrane	other
PKM	pyruvate kinase M1/2	KPYM_MOUSE	0.0035	-0.08	Cytoplasm	kinase
SPTAN1	spectrin alpha, non-erythrocytic 1	SPTN1_MOUSE	0.0001	-0.08	Plasma Membrane	other
TUFM	Tu translation elongation factor, mitochondrial	EFTU_MOUSE	0.044	0.08	Cytoplasm	translation regulator
CAND1	cullin associated and neddylation dissociated 1	CAND1_MOUSE	0.01	0.09	Cytoplasm	transcription regulator
PDIA3	protein disulfide isomerase family A member 3	PDIA3_MOUSE	0.041	0.1	Cytoplasm	peptidase
Rpl23a	ribosomal protein L23A	RL23A_MOUSE	0.024	0.1	Nucleus	other
SDHA	succinate dehydrogenase complex flavoprotein subunit A	SDHA_MOUSE	0.038	0.1	Cytoplasm	enzyme
DNM1	dynamin 1	DYN1_MOUSE	0.0084	0.11	Cytoplasm	enzyme
DMXL2	Dmx like 2	DMXL2_MOUSE	0.031	0.12	Cytoplasm	other
PABPC1	poly(A) binding protein cytoplasmic 1	PABP1_MOUSE	0.046	0.12	Cytoplasm	translation regulator
YWHAH	tyrosine 3-monooxygenase/tryptophan 5-monooxygenase activation protein eta	1433F_MOUSE	0.03	0.12	Cytoplasm	transcription regulator
CACNA2D1	calcium voltage-gated channel auxiliary subunit alpha2delta 1	CA2D1_MOUSE	0.024	0.13	Plasma Membrane	ion channel
CLTC	clathrin heavy chain	CLH1_MOUSE	0.002	0.13	Plasma Membrane	other
RPS16	ribosomal protein S16	RS16_MOUSE	0.03	0.14	Cytoplasm	other
CDK5	cyclin dependent kinase 5	CDK5_MOUSE	0.045	0.15	Nucleus	kinase
CTTN	cortactin	SRC8_MOUSE	0.023	0.15	Plasma Membrane	other
PDIA6	protein disulfide isomerase family A member 6	PDIA6_MOUSE	0.045	0.15	Cytoplasm	enzyme
WDR1	WD repeat domain 1	WDR1_MOUSE	0.012	0.15	Extracellular Space	other
RPLP2	ribosomal protein lateral stalk subunit P2	RLA2_MOUSE	0.0042	0.16	Cytoplasm	other
RTCB	RNA 2',3'-cyclic phosphate and 5'-OH ligase	RTCB_MOUSE	0.021	0.16	Cytoplasm	enzyme
RPL7	ribosomal protein L7	RL7_MOUSE	0.024	0.17	Nucleus	transcription regulator
RPS2	ribosomal protein S2	RS2_MOUSE	0.041	0.17	Cytoplasm	other
TJP1	tight junction protein 1	ZO1_MOUSE	0.023	0.17	Plasma Membrane	other
CDC37	cell division cycle 37	CDC37_MOUSE	0.022	0.18	Cytoplasm	kinase
PHB	prohibitin	PHB_MOUSE	0.005	0.18	Nucleus	transcription regulator
PTPRZ1	protein tyrosine phosphatase, receptor type Z1	PRPTZ_MOUSE	0.04	0.18	Plasma Membrane	phosphatase
GRB2	growth factor receptor bound protein 2	GRB2_MOUSE	0.00017	0.19	Cytoplasm	kinase
DDX1	DEAD-box helicase 1	DDX1_MOUSE	0.035	0.2	Nucleus	enzyme
NACA	nascent polypeptide-associated complex alpha subunit	NACAM_MOUSE	0.019	0.2	Cytoplasm	transcription regulator
NPM1	nucleophosmin 1	NPM_MOUSE	0.022	0.2	Nucleus	transcription regulator
STX1A	syntaxin 1A	STX1A_MOUSE	0.014	0.2	Cytoplasm	transporter
EIF3A	eukaryotic translation initiation factor 3 subunit A	EIF3A_MOUSE	0.00034	0.21	Cytoplasm	other
PURA	purine rich element binding protein A	PURA_MOUSE	0.015	0.21	Nucleus	transcription regulator
RPL10A	ribosomal protein L10a	RL10A_MOUSE	0.0072	0.21	Nucleus	other
DBN1	drebrin 1	DREB_MOUSE	0.0013	0.22	Cytoplasm	other
H2AFX	H2A histone family member X	H2AX_MOUSE	0.0067	0.22	Nucleus	transcription regulator
HNRNPC	heterogeneous nuclear ribonucleoprotein C (C1/C2)	HNRPC_MOUSE	0.0047	0.22	Nucleus	other
HSPA5	heat shock protein family A (Hsp70) member 5	GRP78_MOUSE	0.0001	0.22	Cytoplasm	enzyme
IDH2	isocitrate dehydrogenase (NADP(+)) 2, mitochondrial	IDHP_MOUSE	0.00064	0.22	Cytoplasm	enzyme
PAK1	p21 (RAC1) activated kinase 1	PAK1_MOUSE	0.0036	0.22	Cytoplasm	kinase
SLC1A2	solute carrier family 1 member 2	EAA2_MOUSE	0.0001	0.22	Plasma Membrane	transporter
SYNCRIP	synaptotagmin binding cytoplasmic RNA interacting protein	HNRPQ_MOUSE	0.00039	0.22	Nucleus	other
CORO1C	coronin 1C	COR1C_MOUSE	0.0069	0.23	Cytoplasm	other
DCLK1	doublecortin like kinase 1	DCLK1_MOUSE	0.011	0.23	Plasma Membrane	kinase
HNRNPU	heterogeneous nuclear ribonucleoprotein U	HNRPU_MOUSE	0.0028	0.23	Nucleus	transporter
LANCL2	LanC like 2	LANC2_MOUSE	0.027	0.23	Plasma Membrane	other
LARP1	La ribonucleoprotein domain family member 1	LARP1_MOUSE	0.015	0.23	Cytoplasm	translation regulator
SFPQ	splicing factor proline and glutamine rich	SFPQ_MOUSE	0.0057	0.23	Nucleus	other
COPB1	coatomer protein complex subunit beta 1	COPB_MOUSE	0.023	0.24	Cytoplasm	transporter
RPL31	ribosomal protein L31	RL31_MOUSE	0.00066	0.24	Cytoplasm	other
SNAP47	synaptosome associated protein 47	SNP47_MOUSE	0.00024	0.24	Plasma Membrane	other
VCL	vinculin	VINC_MOUSE	0.0037	0.24	Plasma Membrane	enzyme
DDX17	DEAD-box helicase 17	DDX17_MOUSE	0.046	0.25	Nucleus	enzyme
HNRNPK	heterogeneous nuclear ribonucleoprotein K	HNRPK_MOUSE	0.0019	0.25	Nucleus	transcription regulator
WDR13	WD repeat domain 13	WDR13_MOUSE	0.019	0.25	Nucleus	other
NCL	nucleolin	NUCL_MOUSE	0.0001	0.26	Nucleus	other
ACTN4	actinin alpha 4	ACTN4_MOUSE	0.0036	0.27	Cytoplasm	transcription regulator
FXR1	FMR1 autosomal homolog 1	FXR1_MOUSE	0.01	0.27	Cytoplasm	other
HNRNPL	heterogeneous nuclear ribonucleoprotein L	HNRPL_MOUSE	0.0062	0.27	Nucleus	other
RPL6	ribosomal protein L6	RL6_MOUSE	0.00098	0.27	Nucleus	other
EIF2S1	eukaryotic translation initiation factor 2 subunit alpha	IF2A_MOUSE	0.0044	0.29	Cytoplasm	translation regulator
ILF3	interleukin enhancer binding factor 3	ILF3_MOUSE	0.0025	0.29	Nucleus	transcription regulator
TLN1	talin 1	TLN1_MOUSE	0.0051	0.29	Plasma Membrane	other
CLU	clusterin	CLUS_MOUSE	0.025	0.3	Cytoplasm	other
TMED10	transmembrane p24 trafficking protein 10	TMEDA_MOUSE	0.018	0.3	Cytoplasm	transporter
LMNA	lamin A/C	LMNA_MOUSE	0.0001	0.32	Nucleus	other
SET	SET nuclear proto-oncogene	SET_MOUSE	0.0001	0.32	Nucleus	phosphatase
NOP56	NOP56 ribonucleoprotein	NOP56_MOUSE	0.0024	0.35	Nucleus	other
RALY	RALY heterogeneous nuclear ribonucleoprotein	RALY_MOUSE	0.039	0.35	Nucleus	transcription regulator
MYH9	myosin heavy chain 9	MYH9_MOUSE	0.00022	0.36	Cytoplasm	enzyme
PTBP2	polypyrimidine tract binding protein 2	PTBP2_MOUSE	0.0028	0.36	Nucleus	other
MATR3	matrin 3	MATR3_MOUSE	0.0001	0.37	Nucleus	other
CCAR2	cell cycle and apoptosis regulator 2	CCAR2_MOUSE	0.01	0.4	Cytoplasm	peptidase
FAM120A	family with sequence similarity 120A	F120A_MOUSE	0.0014	0.45	Cytoplasm	other
DLGAP3	DLG associated protein 3	DLGP3_MOUSE	0.015	0.46	Cytoplasm	other
LAMC1	laminin subunit gamma 1	LAMC1_MOUSE	0.00072	0.46	Extracellular Space	other
LRPAP1	LDL receptor related protein associated protein 1	AMRP_MOUSE	0.0063	0.46	Plasma Membrane	other
HNRNPM	heterogeneous nuclear ribonucleoprotein M	HNRPM_MOUSE	0.021	0.51	Nucleus	other
VIM	vimentin	VIME_MOUSE	0.0001	0.62	Cytoplasm	other
SYNGAP1	synaptic Ras GTPase activating protein 1	SYGP1_MOUSE	0.00086	0.63	Plasma Membrane	other
ANXA2	annexin A2	ANXA2_MOUSE	0.045	0.65	Plasma Membrane	other
SORBS2	sorbin and SH3 domain containing 2	SRBS2_MOUSE	0.003	0.81	Plasma Membrane	other
FLNA	filamin A	FLNA_MOUSE	0.0001	0.86	Cytoplasm	other
MYH11	myosin heavy chain 11	MYH11_MOUSE	0.0001	0.97	Cytoplasm	other
FLNB	filamin B	FLNB_MOUSE	0.0095	1.29	Cytoplasm	other

## Sheet: S4 Morphology of Neurons
Symbol	Entrez Gene Name	UniProt Accession	Expr p-value	Expr Log Ratio	Location	Family
GFAP	glial fibrillary acidic protein	GFAP_MOUSE	0.0001	-1.03	Cytoplasm	other
GPM6B	glycoprotein M6B	GPM6B_MOUSE	0.019	-0.92	Plasma Membrane	other
BAIAP2	BAI1 associated protein 2	BAIP2_MOUSE	0.0001	-0.58	Plasma Membrane	kinase
CAMK4	calcium/calmodulin dependent protein kinase IV	KCC4_MOUSE	0.012	-0.52	Nucleus	kinase
PPP3CA	protein phosphatase 3 catalytic subunit alpha	PP2BA_MOUSE	0.0001	-0.51	Cytoplasm	phosphatase
SLC4A3	solute carrier family 4 member 3	B3A3_MOUSE	0.011	-0.45	Plasma Membrane	transporter
PLP1	proteolipid protein 1	MYPR_MOUSE	0.00061	-0.37	Plasma Membrane	other
PLCB1	phospholipase C beta 1	PLCB1_MOUSE	0.00054	-0.29	Cytoplasm	enzyme
GAP43	growth associated protein 43	NEUM_MOUSE	0.0001	-0.28	Plasma Membrane	other
Nefm	neurofilament, medium polypeptide	NFM_MOUSE	0.0001	-0.23	Plasma Membrane	other
CKB	creatine kinase B	KCRB_MOUSE	0.0001	-0.22	Cytoplasm	kinase
APP	amyloid beta precursor protein	A4_MOUSE	0.022	-0.19	Plasma Membrane	other
GJA1	gap junction protein alpha 1	CXA1_MOUSE	0.038	-0.19	Plasma Membrane	transporter
SNCG	synuclein gamma	SYUG_MOUSE	0.0061	-0.19	Cytoplasm	other
CNP	2',3'-cyclic nucleotide 3' phosphodiesterase	CN37_MOUSE	0.00042	-0.18	Cytoplasm	enzyme
KLC1	kinesin light chain 1	KLC1_MOUSE	0.034	-0.18	Cytoplasm	other
PARK7	Parkinsonism associated deglycase	PARK7_MOUSE	0.0076	-0.18	Nucleus	enzyme
OGT	O-linked N-acetylglucosamine (GlcNAc) transferase	OGT1_MOUSE	0.0051	-0.16	Cytoplasm	enzyme
CRMP1	collapsin response mediator protein 1	DPYL1_MOUSE	0.011	-0.13	Cytoplasm	enzyme
PFN1	profilin 1	PROF1_MOUSE	0.035	-0.1	Cytoplasm	other
STX1B	syntaxin 1B	STX1B_MOUSE	0.036	-0.09	Plasma Membrane	other
Ank2	ankyrin 2, brain	ANK2_MOUSE	0.018	-0.08	Plasma Membrane	other
MAP1A	microtubule associated protein 1A	MAP1A_MOUSE	0.0073	-0.07	Cytoplasm	other
DNM1	dynamin 1	DYN1_MOUSE	0.0084	0.11	Cytoplasm	enzyme
PHB2	prohibitin 2	PHB2_MOUSE	0.037	0.11	Cytoplasm	transcription regulator
NFASC	neurofascin	NFASC_MOUSE	0.004	0.14	Plasma Membrane	other
PLXNA4	plexin A4	PLXA4_MOUSE	0.02	0.14	Plasma Membrane	transmembrane receptor
CDK5	cyclin dependent kinase 5	CDK5_MOUSE	0.045	0.15	Nucleus	kinase
SLC12A5	solute carrier family 12 member 5	S12A5_MOUSE	0.0038	0.15	Plasma Membrane	transporter
SOD2	superoxide dismutase 2	SODM_MOUSE	0.036	0.15	Cytoplasm	enzyme
MAP2	microtubule associated protein 2	MTAP2_MOUSE	0.0001	0.16	Plasma Membrane	other
SNAP91	synaptosome associated protein 91	AP180_MOUSE	0.0019	0.16	Plasma Membrane	other
STX1A	syntaxin 1A	STX1A_MOUSE	0.014	0.2	Cytoplasm	transporter
CHMP4B	charged multivesicular body protein 4B	CHM4B_MOUSE	0.049	0.21	Cytoplasm	other
PURA	purine rich element binding protein A	PURA_MOUSE	0.015	0.21	Nucleus	transcription regulator
DBN1	drebrin 1	DREB_MOUSE	0.0013	0.22	Cytoplasm	other
HNRNPA2B1	heterogeneous nuclear ribonucleoprotein A2/B1	ROA2_MOUSE	0.00017	0.22	Nucleus	other
PAK1	p21 (RAC1) activated kinase 1	PAK1_MOUSE	0.0036	0.22	Cytoplasm	kinase
SLC1A2	solute carrier family 1 member 2	EAA2_MOUSE	0.0001	0.22	Plasma Membrane	transporter
SYNCRIP	synaptotagmin binding cytoplasmic RNA interacting protein	HNRPQ_MOUSE	0.00039	0.22	Nucleus	other
DCLK1	doublecortin like kinase 1	DCLK1_MOUSE	0.011	0.23	Plasma Membrane	kinase
SPARCL1	SPARC like 1	SPRL1_MOUSE	0.011	0.25	Extracellular Space	other
SRCIN1	SRC kinase signaling inhibitor 1	SRCN1_MOUSE	0.0001	0.25	Cytoplasm	other
LAMB2	laminin subunit beta 2	LAMB2_MOUSE	0.0098	0.26	Extracellular Space	enzyme
PTPRA	protein tyrosine phosphatase, receptor type A	PTPRA_MOUSE	0.033	0.26	Plasma Membrane	phosphatase
ITSN1	intersectin 1	ITSN1_MOUSE	0.0011	0.28	Cytoplasm	other
LMNA	lamin A/C	LMNA_MOUSE	0.0001	0.32	Nucleus	other
CADPS2	calcium dependent secretion activator 2	CAPS2_MOUSE	0.0089	0.33	Plasma Membrane	other
DLG3	discs large MAGUK scaffold protein 3	DLG3_MOUSE	0.0032	0.33	Plasma Membrane	kinase
LMNB1	lamin B1	LMNB1_MOUSE	0.0001	0.33	Nucleus	other
SLC17A6	solute carrier family 17 member 6	VGLU2_MOUSE	0.0012	0.34	Plasma Membrane	transporter
SNTA1	syntrophin alpha 1	SNTA1_MOUSE	0.029	0.34	Plasma Membrane	other
MECP2	methyl-CpG binding protein 2	MECP2_MOUSE	0.0001	0.36	Nucleus	transcription regulator
SHANK1	SH3 and multiple ankyrin repeat domains 1	SHAN1_MOUSE	0.045	0.36	Cytoplasm	other
NOS1	nitric oxide synthase 1	NOS1_MOUSE	0.0013	0.37	Cytoplasm	enzyme
PNPLA6	patatin like phospholipase domain containing 6	PLPL6_MOUSE	0.0001	0.45	Cytoplasm	enzyme
LAMC1	laminin subunit gamma 1	LAMC1_MOUSE	0.00072	0.46	Extracellular Space	other
LRPAP1	LDL receptor related protein associated protein 1	AMRP_MOUSE	0.0063	0.46	Plasma Membrane	other
HSPG2	heparan sulfate proteoglycan 2	PGBM_MOUSE	0.00032	0.47	Extracellular Space	enzyme
VIM	vimentin	VIME_MOUSE	0.0001	0.62	Cytoplasm	other
SYNGAP1	synaptic Ras GTPase activating protein 1	SYGP1_MOUSE	0.00086	0.63	Plasma Membrane	other
SORBS2	sorbin and SH3 domain containing 2	SRBS2_MOUSE	0.003	0.81	Plasma Membrane	other
FLNA	filamin A	FLNA_MOUSE	0.0001	0.86	Cytoplasm	other
SLC17A7	solute carrier family 17 member 7	VGLU1_MOUSE	0.0001	1.25	Plasma Membrane	transporter

## Sheet: S5 Venn Diagram Breakdown
Accession Number	T-Test	Log2 (GCSF / Sal)				Accession Number	T-Test	Log2 (Cocaine / Sal)				Accession Number	T-Test	Log2(G/C / Sal)
AT8A1_MOUSE	0.0001	-0.34				AT8A1_MOUSE	0.0001	-0.47				AT8A1_MOUSE	0.0001	-0.42	Significantly regulated in all treatment conditions
KCRB_MOUSE	0.0001	-0.22				KCRB_MOUSE	0.0001	-0.19				KCRB_MOUSE	0.0001	-0.2
LMNA_MOUSE	0.0001	0.32				LMNA_MOUSE	0.0001	0.29				LMNA_MOUSE	0.0001	0.3
MECP2_MOUSE	0.0001	0.36				MECP2_MOUSE	0.0001	0.28				MECP2_MOUSE	0.0001	0.28
MYH11_MOUSE	0.0001	0.97				MYH11_MOUSE	0.0001	0.88				MYH11_MOUSE	0.0001	1.01
PDE2A_MOUSE	0.0001	-1.09				PDE2A_MOUSE	0.0001	-1.32				PDE2A_MOUSE	0.0001	-0.69
SPTN1_MOUSE	0.0001	-0.08				SPTN1_MOUSE	0.0001	-0.06				SPTN1_MOUSE	0.0001	-0.06
STXB1_MOUSE	0.00075	-0.12				STXB1_MOUSE	0.0001	-0.17				STXB1_MOUSE	0.0001	-0.14
BASP1_MOUSE	0.0037	-0.2				BASP1_MOUSE	0.0001	0.32				BASP1_MOUSE	0.0001	0.33
FLNA_MOUSE	0.0001	0.86				FLNA_MOUSE	0.00033	0.74				FLNA_MOUSE	0.0001	1.01
IMPA1_MOUSE	0.0017	-0.17				IMPA1_MOUSE	0.00036	-0.19				IMPA1_MOUSE	0.0001	-0.3
FUS_MOUSE	0.0001	0.39				FUS_MOUSE	0.00081	0.23				FUS_MOUSE	0.0001	0.36
SRCN1_MOUSE	0.0001	0.25				SRCN1_MOUSE	0.0036	0.1				SRCN1_MOUSE	0.0001	0.13
SET_MOUSE	0.0001	0.32				SET_MOUSE	0.026	0.11				SET_MOUSE	0.0001	0.2
TY3H_MOUSE	0.0001	-0.92				TY3H_MOUSE	0.029	-0.24				TY3H_MOUSE	0.0001	-0.72
PDE10_MOUSE	0.0001	-1.74				PDE10_MOUSE	0.0001	-1.82				PDE10_MOUSE	0.00011	-1.12
APEX1_MOUSE	0.0058	0.42				APEX1_MOUSE	0.02	0.32				APEX1_MOUSE	0.00013	0.46
GP158_MOUSE	0.0001	-0.6				GP158_MOUSE	0.0001	-0.7				GP158_MOUSE	0.00017	-0.45
MDHC_MOUSE	0.0012	-0.14				MDHC_MOUSE	0.036	-0.08				MDHC_MOUSE	0.00019	-0.16
SPTB2_MOUSE	0.0001	-0.1				SPTB2_MOUSE	0.0001	-0.1				SPTB2_MOUSE	0.0002	-0.07
COQ6_MOUSE	0.00014	0.26				COQ6_MOUSE	0.00017	0.28				COQ6_MOUSE	0.00023	0.28
PA1B3_MOUSE	0.0011	0.27				PA1B3_MOUSE	0.0015	0.28				PA1B3_MOUSE	0.00023	0.28
LMNB2_MOUSE	0.00055	0.23				LMNB2_MOUSE	0.00038	0.3				LMNB2_MOUSE	0.00025	0.27
PP2BA_MOUSE	0.0001	-0.51				PP2BA_MOUSE	0.0001	-0.69				PP2BA_MOUSE	0.00027	-0.48
NECA2_MOUSE	0.016	-0.46				NECA2_MOUSE	0.00014	-0.76				NECA2_MOUSE	0.00043	-0.64
VIME_MOUSE	0.0001	0.62				VIME_MOUSE	0.045	0.37				VIME_MOUSE	0.00044	0.62
PDE1B_MOUSE	0.0001	-0.75				PDE1B_MOUSE	0.0001	-0.93				PDE1B_MOUSE	0.00058	-0.56
KPCB_MOUSE	0.0001	-0.69				KPCB_MOUSE	0.0001	-0.74				KPCB_MOUSE	0.00059	-0.48
VIAAT_MOUSE	0.012	-0.31				VIAAT_MOUSE	0.0001	-0.43				VIAAT_MOUSE	0.0006	-0.4
TLN1_MOUSE	0.0051	0.29				TLN1_MOUSE	0.0035	0.29				TLN1_MOUSE	0.00078	0.34
FSCN1_MOUSE	0.0001	-0.32				FSCN1_MOUSE	0.0001	-0.31				FSCN1_MOUSE	0.00084	-0.19
1433Z_MOUSE	0.0028	-0.18				1433Z_MOUSE	0.0001	-0.34				1433Z_MOUSE	0.0009	-0.24
RAB14_MOUSE	0.0011	-0.18				RAB14_MOUSE	0.0001	-0.22				RAB14_MOUSE	0.001	-0.17
BAIP2_MOUSE	0.0001	-0.58				BAIP2_MOUSE	0.0001	-0.85				BAIP2_MOUSE	0.0011	-0.43
SYT6_MOUSE	0.012	-0.54				SYT6_MOUSE	0.015	-0.55				SYT6_MOUSE	0.0011	-0.87
RL7A_MOUSE	0.0001	0.22				RL7A_MOUSE	0.022	0.1				RL7A_MOUSE	0.0013	0.14
PGBM_MOUSE	0.00032	0.47				PGBM_MOUSE	0.00015	0.46				PGBM_MOUSE	0.0014	0.47
H2AY_MOUSE	0.0001	0.29				H2AY_MOUSE	0.0001	0.31				H2AY_MOUSE	0.0017	0.25
CANB1_MOUSE	0.0013	-0.57				CANB1_MOUSE	0.00017	-0.67				CANB1_MOUSE	0.0017	-0.59
ROA2_MOUSE	0.00017	0.22				ROA2_MOUSE	0.00076	0.15				ROA2_MOUSE	0.0018	0.14
PLCB1_MOUSE	0.00054	-0.29				PLCB1_MOUSE	0.0001	-0.31				PLCB1_MOUSE	0.002	-0.24
GPDA_MOUSE	0.0022	-0.27				GPDA_MOUSE	0.022	-0.15				GPDA_MOUSE	0.0022	-0.16
NUCL_MOUSE	0.0001	0.26				NUCL_MOUSE	0.0001	0.2				NUCL_MOUSE	0.0024	0.14
SYCC_MOUSE	0.013	0.54				SYCC_MOUSE	0.017	0.49				SYCC_MOUSE	0.0024	0.63
RL23A_MOUSE	0.024	0.1				RL23A_MOUSE	0.0016	0.13				RL23A_MOUSE	0.0027	0.13
RS19_MOUSE	0.00084	0.2				RS19_MOUSE	0.026	0.13				RS19_MOUSE	0.003	0.12
GRP78_MOUSE	0.0001	0.22				GRP78_MOUSE	0.01	0.07				GRP78_MOUSE	0.0032	0.08
SEPT9_MOUSE	0.00055	0.38				SEPT9_MOUSE	0.00064	0.33				SEPT9_MOUSE	0.0034	0.26
ZO1_MOUSE	0.023	0.17				ZO1_MOUSE	0.047	0.18				ZO1_MOUSE	0.0035	0.22
AHI1_MOUSE	0.0015	0.42				AHI1_MOUSE	0.0091	0.3				AHI1_MOUSE	0.004	0.32
HAP1_MOUSE	0.0005	0.71				HAP1_MOUSE	0.0043	0.45				HAP1_MOUSE	0.0043	0.33
MTAP2_MOUSE	0.0001	0.16				MTAP2_MOUSE	0.0001	0.12				MTAP2_MOUSE	0.0046	0.07
DPYL1_MOUSE	0.011	-0.13				DPYL1_MOUSE	0.0001	-0.18				DPYL1_MOUSE	0.0047	-0.12
LAMC1_MOUSE	0.00072	0.46				LAMC1_MOUSE	0.0015	0.38				LAMC1_MOUSE	0.0047	0.36
ADA23_MOUSE	0.0035	-0.35				ADA23_MOUSE	0.026	-0.21				ADA23_MOUSE	0.0053	-0.25
H4_MOUSE	0.00064	0.23				H4_MOUSE	0.0002	0.27				H4_MOUSE	0.006	0.23
ROA3_MOUSE	0.0001	0.3				ROA3_MOUSE	0.00051	0.26				ROA3_MOUSE	0.0063	0.2
KAD4_MOUSE	0.00028	0.39				KAD4_MOUSE	0.028	0.22				KAD4_MOUSE	0.0067	0.25
SNX6_MOUSE	0.035	0.1				SNX6_MOUSE	0.00013	0.14				SNX6_MOUSE	0.007	0.11
PHF24_MOUSE	0.027	-0.18				PHF24_MOUSE	0.0068	-0.26				PHF24_MOUSE	0.007	-0.24
DCE2_MOUSE	0.00043	-0.42				DCE2_MOUSE	0.0001	-0.56				DCE2_MOUSE	0.0071	-0.33
CAP1_MOUSE	0.0029	-0.25				CAP1_MOUSE	0.0001	-0.42				CAP1_MOUSE	0.0072	-0.2
G6PI_MOUSE	0.0034	-0.18				G6PI_MOUSE	0.019	-0.12				G6PI_MOUSE	0.0072	-0.14
LDHB_MOUSE	0.0001	-0.19				LDHB_MOUSE	0.022	-0.1				LDHB_MOUSE	0.0075	-0.11
GFAP_MOUSE	0.0001	-1.03				GFAP_MOUSE	0.0001	-1.2				GFAP_MOUSE	0.0082	-0.58
TOM70_MOUSE	0.019	-0.26				TOM70_MOUSE	0.041	-0.29				TOM70_MOUSE	0.009	-0.35
DPYL2_MOUSE	0.0024	-0.09				DPYL2_MOUSE	0.0019	-0.07				DPYL2_MOUSE	0.0091	-0.07
GSTA4_MOUSE	0.014	0.16				GSTA4_MOUSE	0.048	0.13				GSTA4_MOUSE	0.0092	0.15
VGLU1_MOUSE	0.0001	1.25				VGLU1_MOUSE	0.0023	0.62				VGLU1_MOUSE	0.0096	0.43
ACTN4_MOUSE	0.0036	0.27				ACTN4_MOUSE	0.00058	0.22				ACTN4_MOUSE	0.011	0.21
EIF3H_MOUSE	0.00043	0.46				EIF3H_MOUSE	0.0012	0.34				EIF3H_MOUSE	0.011	0.29
FLOT2_MOUSE	0.0001	0.28				FLOT2_MOUSE	0.038	0.1				FLOT2_MOUSE	0.011	0.12
C2C2L_MOUSE	0.0007	-0.35				C2C2L_MOUSE	0.0001	-0.43				C2C2L_MOUSE	0.012	-0.23
AK1A1_MOUSE	0.047	0.09				AK1A1_MOUSE	0.013	0.13				AK1A1_MOUSE	0.012	0.13
FLNB_MOUSE	0.0095	1.29				FLNB_MOUSE	0.015	1.26				FLNB_MOUSE	0.012	1.43
KCC2B_MOUSE	0.0026	-0.21				KCC2B_MOUSE	0.0001	-0.42				KCC2B_MOUSE	0.013	-0.19
OGT1_MOUSE	0.0051	-0.16				OGT1_MOUSE	0.0032	-0.2				OGT1_MOUSE	0.013	-0.16
SNP47_MOUSE	0.00024	0.24				SNP47_MOUSE	0.0004	0.24				SNP47_MOUSE	0.014	0.15
PDC6I_MOUSE	0.011	0.16				PDC6I_MOUSE	0.032	0.14				PDC6I_MOUSE	0.014	0.13
TBA8_MOUSE	0.044	0.36				TBA8_MOUSE	0.0024	0.55				TBA8_MOUSE	0.015	0.41
OXR1_MOUSE	0.0068	0.17				OXR1_MOUSE	0.0053	0.14				OXR1_MOUSE	0.015	0.13
MYH9_MOUSE	0.00022	0.36				MYH9_MOUSE	0.0082	0.25				MYH9_MOUSE	0.016	0.25
PP1R7_MOUSE	0.00023	-0.34				PP1R7_MOUSE	0.0001	-0.38				PP1R7_MOUSE	0.017	-0.2
PPR1B_MOUSE	0.0008	-1.68				PPR1B_MOUSE	0.00047	-1.47				PPR1B_MOUSE	0.018	-0.97
ASNS_MOUSE	0.011	0.2				ASNS_MOUSE	0.0001	0.35				ASNS_MOUSE	0.02	0.21
CXA1_MOUSE	0.038	-0.19				CXA1_MOUSE	0.005	-0.34				CXA1_MOUSE	0.02	-0.22
PAIRB_MOUSE	0.0001	0.27				PAIRB_MOUSE	0.0064	0.16				PAIRB_MOUSE	0.02	0.12
AP180_MOUSE	0.0019	0.16				AP180_MOUSE	0.0021	0.14				AP180_MOUSE	0.021	0.1
HDGR3_MOUSE	0.026	0.19				HDGR3_MOUSE	0.025	0.16				HDGR3_MOUSE	0.021	0.18
MP2K6_MOUSE	0.019	-0.36				MP2K6_MOUSE	0.045	-0.35				MP2K6_MOUSE	0.021	-0.41
RTN1_MOUSE	0.00014	-0.29				RTN1_MOUSE	0.00021	-0.23				RTN1_MOUSE	0.023	-0.15
KHDR3_MOUSE	0.00094	0.46				KHDR3_MOUSE	0.0049	0.43				KHDR3_MOUSE	0.023	0.25
CAH2_MOUSE	0.013	-0.15				CAH2_MOUSE	0.011	0.12				CAH2_MOUSE	0.023	0.1
RAGP1_MOUSE	0.013	0.39				RAGP1_MOUSE	0.043	0.32				RAGP1_MOUSE	0.023	0.34
ARP2_MOUSE	0.047	-0.13				ARP2_MOUSE	0.0001	-0.28				ARP2_MOUSE	0.024	-0.13
LASP1_MOUSE	0.00085	0.33				LASP1_MOUSE	0.04	0.17				LASP1_MOUSE	0.025	0.18
RS26_MOUSE	0.023	0.25				RS26_MOUSE	0.023	0.24				RS26_MOUSE	0.026	0.24
RL10A_MOUSE	0.0072	0.21				RL10A_MOUSE	0.032	0.16				RL10A_MOUSE	0.028	0.14
PTN5_MOUSE	0.0025	-0.85				PTN5_MOUSE	0.0006	-0.94				PTN5_MOUSE	0.031	-0.58
ZN512_MOUSE	0.022	0.34				ZN512_MOUSE	0.01	0.28				ZN512_MOUSE	0.031	0.22
ARPC2_MOUSE	0.041	-0.13				ARPC2_MOUSE	0.00031	-0.28				ARPC2_MOUSE	0.032	-0.2
HMGB1_MOUSE	0.017	0.14				HMGB1_MOUSE	0.00054	0.19				HMGB1_MOUSE	0.034	0.14
GSH1_MOUSE	0.0086	-0.22				GSH1_MOUSE	0.0001	-0.31				GSH1_MOUSE	0.036	-0.21
KLC1_MOUSE	0.034	-0.18				KLC1_MOUSE	0.0044	-0.22				KLC1_MOUSE	0.036	-0.17
FXR1_MOUSE	0.01	0.27				FXR1_MOUSE	0.03	0.23				FXR1_MOUSE	0.036	0.18
RHG01_MOUSE	0.043	-0.3				RHG01_MOUSE	0.043	-0.41				RHG01_MOUSE	0.036	-0.32
AMRP_MOUSE	0.0063	0.46				AMRP_MOUSE	0.041	0.28				AMRP_MOUSE	0.037	0.28
PCKGM_MOUSE	0.037	0.23				PCKGM_MOUSE	0.0047	0.24				PCKGM_MOUSE	0.038	0.18
ATG7_MOUSE	0.015	0.37				ATG7_MOUSE	0.021	0.41				ATG7_MOUSE	0.039	0.32
FLOT1_MOUSE	0.0001	0.38				FLOT1_MOUSE	0.015	0.2				FLOT1_MOUSE	0.04	0.17
MATR3_MOUSE	0.0001	0.37				MATR3_MOUSE	0.0001	0.27				MATR3_MOUSE	0.041	0.13
GLSK_MOUSE	0.0012	0.21				GLSK_MOUSE	0.0037	0.19				GLSK_MOUSE	0.041	0.12
KPYM_MOUSE	0.0035	-0.08				KPYM_MOUSE	0.0067	-0.07				KPYM_MOUSE	0.041	-0.06
DLG2_MOUSE	0.0018	-0.21				DLG2_MOUSE	0.0074	-0.21				DLG2_MOUSE	0.041	-0.15
PSPC1_MOUSE	0.0031	0.21				PSPC1_MOUSE	0.0076	0.24				PSPC1_MOUSE	0.041	0.17
IF2A_MOUSE	0.0044	0.29				IF2A_MOUSE	0.0031	0.39				IF2A_MOUSE	0.043	0.31
ADCY5_MOUSE	0.0016	-0.8				ADCY5_MOUSE	0.0001	-1.04				ADCY5_MOUSE	0.045	-0.47
SYT12_MOUSE	0.027	-0.64				SYT12_MOUSE	0.01	-0.74				SYT12_MOUSE	0.045	-0.6
EFHD2_MOUSE	0.00027	0.35				EFHD2_MOUSE	0.0048	0.2				EFHD2_MOUSE	0.047	0.14
VGLU2_MOUSE	0.0012	0.34				VGLU2_MOUSE	0.00068	0.32				VGLU2_MOUSE	0.048	0.22
S12A5_MOUSE	0.0038	0.15				S12A5_MOUSE	0.03	0.11				S12A5_MOUSE	0.049	0.09
LAMB2_MOUSE	0.0098	0.26				LAMB2_MOUSE	0.0001	0.37				LAMB2_MOUSE	0.1	0.15	Regulated in G-CSF & Cocaine Groups
AMPB_MOUSE	0.024	-0.18				AMPB_MOUSE	0.0001	-0.32				AMPB_MOUSE	0.16	-0.15
NEUM_MOUSE	0.0001	-0.28				NEUM_MOUSE	0.0001	-0.29				NEUM_MOUSE	0.58	-0.03
CRYM_MOUSE	0.0089	-0.43				CRYM_MOUSE	0.00017	-0.68				CRYM_MOUSE	0.21	-0.23
G3P_MOUSE	0.0013	-0.16				G3P_MOUSE	0.00033	-0.16				G3P_MOUSE	0.13	-0.08
NSMA2_MOUSE	0.0081	-0.95				NSMA2_MOUSE	0.00046	-1.28				NSMA2_MOUSE	0.11	-0.5
PROF1_MOUSE	0.035	-0.1				PROF1_MOUSE	0.0008	-0.15				PROF1_MOUSE	0.067	-0.09
LPPRC_MOUSE	0.037	0.2				LPPRC_MOUSE	0.00096	0.25				LPPRC_MOUSE	0.41	0.07
ANK2_MOUSE	0.018	-0.08				ANK2_MOUSE	0.0011	-0.1				ANK2_MOUSE	0.067	-0.06
AQP4_MOUSE	0.0039	-0.38				AQP4_MOUSE	0.0011	-0.42				AQP4_MOUSE	0.49	-0.11
VAMP1_MOUSE	0.0085	0.53				VAMP1_MOUSE	0.0018	0.59				VAMP1_MOUSE	0.32	0.19
VISL1_MOUSE	0.018	0.15				VISL1_MOUSE	0.002	0.19				VISL1_MOUSE	0.2	0.09
BCR_MOUSE	0.00082	-0.58				BCR_MOUSE	0.0022	-0.68				BCR_MOUSE	0.061	-0.41
CC50A_MOUSE	0.0061	-0.47				CC50A_MOUSE	0.0023	-0.49				CC50A_MOUSE	0.085	-0.33
K1C42_MOUSE	0.011	0.66				K1C42_MOUSE	0.0023	1.02				K1C42_MOUSE	0.71	0.15
QCR7_MOUSE	0.041	0.1				QCR7_MOUSE	0.0025	0.15				QCR7_MOUSE	0.052	0.11
MPP3_MOUSE	0.00023	-0.58				MPP3_MOUSE	0.0026	-0.47				MPP3_MOUSE	0.2	-0.2
AUHM_MOUSE	0.028	0.17				AUHM_MOUSE	0.0031	0.23				AUHM_MOUSE	0.64	0.04
CALB2_MOUSE	0.0001	0.42				CALB2_MOUSE	0.0036	0.29				CALB2_MOUSE	0.8	-0.03
LMNB1_MOUSE	0.0001	0.33				LMNB1_MOUSE	0.0037	0.21				LMNB1_MOUSE	0.2	0.11
CALM3_MOUSE	0.011	-0.37				CALM3_MOUSE	0.006	-0.35				CALM3_MOUSE	0.22	-0.15
THIL_MOUSE	0.0001	0.2				THIL_MOUSE	0.0063	0.11				THIL_MOUSE	0.19	0.06
CPLX2_MOUSE	0.023	-0.57				CPLX2_MOUSE	0.0075	-0.64				CPLX2_MOUSE	0.27	-0.23
KCC1D_MOUSE	0.037	-0.2				KCC1D_MOUSE	0.0081	-0.24				KCC1D_MOUSE	0.26	-0.1
RL31_MOUSE	0.00066	0.24				RL31_MOUSE	0.0084	0.18				RL31_MOUSE	0.99	0
PUR4_MOUSE	0.0017	0.25				PUR4_MOUSE	0.0093	0.22				PUR4_MOUSE	0.073	0.15
EIF3A_MOUSE	0.00034	0.21				EIF3A_MOUSE	0.0093	0.14				EIF3A_MOUSE	0.21	0.09
PCP4_MOUSE	0.023	-0.57				PCP4_MOUSE	0.0093	-0.68				PCP4_MOUSE	0.73	-0.06
PTPRA_MOUSE	0.033	0.26				PTPRA_MOUSE	0.0094	0.29				PTPRA_MOUSE	0.77	0.09
A4_MOUSE	0.022	-0.19				A4_MOUSE	0.01	-0.24				A4_MOUSE	0.41	-0.09
HNRPL_MOUSE	0.0062	0.27				HNRPL_MOUSE	0.011	0.2				HNRPL_MOUSE	0.19	0.16
PADI2_MOUSE	0.0001	-0.71				PADI2_MOUSE	0.012	-0.28				PADI2_MOUSE	0.54	-0.05
PPCEL_MOUSE	0.026	0.2				PPCEL_MOUSE	0.013	0.23				PPCEL_MOUSE	0.2	0.13
ABI1_MOUSE	0.0071	-0.35				ABI1_MOUSE	0.013	-0.28				ABI1_MOUSE	0.36	-0.12
RHG35_MOUSE	0.0036	0.33				RHG35_MOUSE	0.014	0.23				RHG35_MOUSE	0.097	0.14
FUMH_MOUSE	0.041	0.08				FUMH_MOUSE	0.015	0.09				FUMH_MOUSE	0.062	0.07
EHD2_MOUSE	0.014	1				EHD2_MOUSE	0.015	1.08				EHD2_MOUSE	0.07	1.06
ACY1_MOUSE	0.0003	-0.62				ACY1_MOUSE	0.015	-0.32				ACY1_MOUSE	0.23	-0.18
RS3A_MOUSE	0.0069	0.19				RS3A_MOUSE	0.016	0.17				RS3A_MOUSE	0.075	0.09
KCC4_MOUSE	0.012	-0.52				KCC4_MOUSE	0.016	-0.52				KCC4_MOUSE	0.19	-0.29
PLPL6_MOUSE	0.0001	0.45				PLPL6_MOUSE	0.016	0.27				PLPL6_MOUSE	0.7	0.06
CN166_MOUSE	0.031	0.13				CN166_MOUSE	0.017	0.09				CN166_MOUSE	0.11	0.1
CSPG5_MOUSE	0.00059	0.49				CSPG5_MOUSE	0.017	0.3				CSPG5_MOUSE	0.71	0.12
GPM6B_MOUSE	0.019	-0.92				GPM6B_MOUSE	0.018	-1				GPM6B_MOUSE	0.21	-0.57
STRN_MOUSE	0.016	-0.28				STRN_MOUSE	0.019	-0.26				STRN_MOUSE	0.2	-0.13
H2AX_MOUSE	0.0067	0.22				H2AX_MOUSE	0.02	0.16				H2AX_MOUSE	0.13	0.14
TTC9A_MOUSE	0.0063	-0.22				TTC9A_MOUSE	0.02	-0.2				TTC9A_MOUSE	0.14	-0.12
ILF3_MOUSE	0.0025	0.29				ILF3_MOUSE	0.02	0.19				ILF3_MOUSE	0.36	0.06
PDIA3_MOUSE	0.041	0.1				PDIA3_MOUSE	0.021	0.08				PDIA3_MOUSE	0.072	0.07
RS23_MOUSE	0.008	0.23				RS23_MOUSE	0.021	0.19				RS23_MOUSE	0.24	0.09
ATP5H_MOUSE	0.035	0.13				ATP5H_MOUSE	0.021	0.13				ATP5H_MOUSE	0.25	0.06
IDHC_MOUSE	0.044	0.1				IDHC_MOUSE	0.022	0.11				IDHC_MOUSE	0.08	0.11
SYGP1_MOUSE	0.00086	0.63				SYGP1_MOUSE	0.022	0.42				SYGP1_MOUSE	0.31	0.16
PHB_MOUSE	0.005	0.18				PHB_MOUSE	0.024	0.11				PHB_MOUSE	0.25	0.05
RS2_MOUSE	0.041	0.17				RS2_MOUSE	0.025	0.14				RS2_MOUSE	0.15	0.1
SOS1_MOUSE	0.036	0.24				SOS1_MOUSE	0.027	0.19				SOS1_MOUSE	0.17	-0.1
SAC1_MOUSE	0.049	0.15				SAC1_MOUSE	0.027	0.18				SAC1_MOUSE	0.68	0.03
DLGP3_MOUSE	0.015	0.46				DLGP3_MOUSE	0.028	0.35				DLGP3_MOUSE	0.28	0.14
IPP2_MOUSE	0.025	-0.34				IPP2_MOUSE	0.029	-0.29				IPP2_MOUSE	0.89	0.02
HPLN4_MOUSE	0.011	0.33				HPLN4_MOUSE	0.031	0.27				HPLN4_MOUSE	0.31	0.12
UBA1_MOUSE	0.018	0.07				UBA1_MOUSE	0.031	-0.07				UBA1_MOUSE	0.72	-0.01
NDUA6_MOUSE	0.016	0.1				NDUA6_MOUSE	0.035	0.1				NDUA6_MOUSE	0.81	0
RTCB_MOUSE	0.021	0.16				RTCB_MOUSE	0.036	0.12				RTCB_MOUSE	0.082	0.09
DECR_MOUSE	0.0083	0.17				DECR_MOUSE	0.037	0.13				DECR_MOUSE	0.69	-0.02
SRBS2_MOUSE	0.003	0.81				SRBS2_MOUSE	0.038	0.54				SRBS2_MOUSE	0.17	0.38
NDUA9_MOUSE	0.0015	0.18				NDUA9_MOUSE	0.038	0.12				NDUA9_MOUSE	0.54	-0.04
PRP19_MOUSE	0.016	0.38				PRP19_MOUSE	0.039	0.3				PRP19_MOUSE	0.094	0.24
PALM_MOUSE	0.013	-0.22				PALM_MOUSE	0.039	-0.2				PALM_MOUSE	0.48	-0.06
DDX1_MOUSE	0.035	0.2				DDX1_MOUSE	0.039	0.19				DDX1_MOUSE	0.58	0.06
KCC2G_MOUSE	0.032	0.19				KCC2G_MOUSE	0.039	0.19				KCC2G_MOUSE	0.74	0.05
DREB_MOUSE	0.0013	0.22				DREB_MOUSE	0.04	0.14				DREB_MOUSE	0.43	0.04
SHAN1_MOUSE	0.045	0.36				SHAN1_MOUSE	0.041	0.3				SHAN1_MOUSE	0.17	0.21
ATPA_MOUSE	0.0011	0.13				ATPA_MOUSE	0.041	0.08				ATPA_MOUSE	0.4	0.04
GRB2_MOUSE	0.00017	0.19				GRB2_MOUSE	0.042	0.1				GRB2_MOUSE	0.14	0.07
NEUA_MOUSE	0.00012	0.3				NEUA_MOUSE	0.043	0.16				NEUA_MOUSE	0.057	0.12
NCALD_MOUSE	0.00052	0.56				NCALD_MOUSE	0.043	0.36				NCALD_MOUSE	0.37	0.11
CAPS2_MOUSE	0.0089	0.33				CAPS2_MOUSE	0.043	0.25				CAPS2_MOUSE	0.73	0.04
PITM1_MOUSE	0.018	0.36				PITM1_MOUSE	0.044	0.26				PITM1_MOUSE	0.14	0.22
SPTB1_MOUSE	0.021	0.16				SPTB1_MOUSE	0.045	0.15				SPTB1_MOUSE	0.55	-0.04
TMEDA_MOUSE	0.018	0.3				TMEDA_MOUSE	0.046	0.24				TMEDA_MOUSE	0.52	0.07
DGKQ_MOUSE	0.0041	0.31				DGKQ_MOUSE	0.047	0.23				DGKQ_MOUSE	0.22	0.14
6PGD_MOUSE	0.046	0.22				6PGD_MOUSE	0.048	0.2				6PGD_MOUSE	0.11	0.16
AUXI_MOUSE	0.011	0.14				AUXI_MOUSE	0.049	0.11				AUXI_MOUSE	0.14	0.07
ECHM_MOUSE	0.027	0.13				ECHM_MOUSE	0.049	0.13				ECHM_MOUSE	0.23	0.06
AL1A1_MOUSE	0.0001	-0.4				AL1A1_MOUSE	0.15	-0.1				AL1A1_MOUSE	0.0001	-0.33	Regulated in G-CSF & G-CSF + Cocaine Groups
RLA2_MOUSE	0.0042	0.16				RLA2_MOUSE	0.7	0.02				RLA2_MOUSE	0.00019	0.21
CAND1_MOUSE	0.01	0.09				CAND1_MOUSE	0.076	0.05				CAND1_MOUSE	0.001	0.1
GRIN1_MOUSE	0.0001	0.39				GRIN1_MOUSE	0.18	0.11				GRIN1_MOUSE	0.0022	0.14
PDIA6_MOUSE	0.045	0.15				PDIA6_MOUSE	0.38	0.06				PDIA6_MOUSE	0.0024	0.19
PTRF_MOUSE	0.0096	0.54				PTRF_MOUSE	0.094	0.46				PTRF_MOUSE	0.0043	0.6
MK10_MOUSE	0.0063	0.25				MK10_MOUSE	0.14	0.15				MK10_MOUSE	0.0044	0.24
RBM14_MOUSE	0.0013	0.42				RBM14_MOUSE	0.052	0.19				RBM14_MOUSE	0.0046	0.3
ALBU_MOUSE	0.0001	0.26				ALBU_MOUSE	0.072	0.13				ALBU_MOUSE	0.0061	0.22
MOES_MOUSE	0.014	0.35				MOES_MOUSE	0.59	0.12				MOES_MOUSE	0.0075	0.36
MARCS_MOUSE	0.0053	-0.29				MARCS_MOUSE	0.69	-0.05				MARCS_MOUSE	0.0088	0.26
STX1B_MOUSE	0.036	-0.09				STX1B_MOUSE	0.055	-0.09				STX1B_MOUSE	0.0094	-0.12
ARMC6_MOUSE	0.036	0.15				ARMC6_MOUSE	0.12	0.11				ARMC6_MOUSE	0.0095	0.23
DDC_MOUSE	0.0019	-0.63				DDC_MOUSE	0.052	-0.29				DDC_MOUSE	0.011	-0.47
RAB9A_MOUSE	0.025	0.31				RAB9A_MOUSE	0.12	0.21				RAB9A_MOUSE	0.011	0.36
GNAO_MOUSE	0.047	-0.12				GNAO_MOUSE	0.16	-0.13				GNAO_MOUSE	0.011	-0.15
TIM22_MOUSE	0.048	0.33				TIM22_MOUSE	0.36	0.17				TIM22_MOUSE	0.011	0.41
ETHE1_MOUSE	0.00072	0.36				ETHE1_MOUSE	0.1	0.17				ETHE1_MOUSE	0.014	0.27
API5_MOUSE	0.0045	0.35				API5_MOUSE	0.1	0.18				API5_MOUSE	0.014	0.31
ECHA_MOUSE	0.017	0.11				ECHA_MOUSE	0.11	0.07				ECHA_MOUSE	0.014	0.12
KCNA1_MOUSE	0.035	-0.51				KCNA1_MOUSE	0.2	-0.31				KCNA1_MOUSE	0.014	-0.38
SYNRG_MOUSE	0.025	0.2				SYNRG_MOUSE	0.5	0.07				SYNRG_MOUSE	0.014	0.21
CSK2B_MOUSE	0.011	-0.31				CSK2B_MOUSE	0.087	-0.26				CSK2B_MOUSE	0.018	-0.35
CHM4B_MOUSE	0.049	0.21				CHM4B_MOUSE	0.87	0.02				CHM4B_MOUSE	0.018	0.23
ANXA2_MOUSE	0.045	0.65				ANXA2_MOUSE	0.13	0.7				ANXA2_MOUSE	0.02	0.95
PAK1_MOUSE	0.0036	0.22				PAK1_MOUSE	0.14	0.13				PAK1_MOUSE	0.02	0.15
HP1B3_MOUSE	0.00086	0.34				HP1B3_MOUSE	0.41	0.18				HP1B3_MOUSE	0.022	0.23
ANLN_MOUSE	0.025	-0.41				ANLN_MOUSE	0.8	0				ANLN_MOUSE	0.022	0.27
RLA1_MOUSE	0.01	0.29				RLA1_MOUSE	0.27	0.1				RLA1_MOUSE	0.024	0.26
PSIP1_MOUSE	0.011	0.2				PSIP1_MOUSE	0.053	0.17				PSIP1_MOUSE	0.025	0.16
TAGL_MOUSE	0.046	1.07				TAGL_MOUSE	0.95	0.02				TAGL_MOUSE	0.025	1.6
KBTBB_MOUSE	0.0079	-0.3				KBTBB_MOUSE	0.055	-0.23				KBTBB_MOUSE	0.028	-0.24
NFM_MOUSE	0.0001	-0.23				NFM_MOUSE	0.065	0.09				NFM_MOUSE	0.029	0.09
ALDH2_MOUSE	0.00041	0.19				ALDH2_MOUSE	0.9	0.01				ALDH2_MOUSE	0.031	0.11
UBP14_MOUSE	0.024	0.18				UBP14_MOUSE	0.77	-0.02				UBP14_MOUSE	0.033	0.16
IDHP_MOUSE	0.00064	0.22				IDHP_MOUSE	0.81	0.01				IDHP_MOUSE	0.034	0.12
RRAS2_MOUSE	0.039	-0.31				RRAS2_MOUSE	0.49	-0.09				RRAS2_MOUSE	0.035	-0.29
SEPT6_MOUSE	0.028	0.25				SEPT6_MOUSE	0.49	-0.05				SEPT6_MOUSE	0.04	-0.19
EHBP1_MOUSE	0.045	0.53				EHBP1_MOUSE	0.078	0.46				EHBP1_MOUSE	0.044	0.47
ITM2B_MOUSE	0.0057	-0.26				ITM2B_MOUSE	0.28	-0.1				ITM2B_MOUSE	0.045	-0.17
B3A3_MOUSE	0.011	-0.45				B3A3_MOUSE	0.056	-0.24				B3A3_MOUSE	0.046	-0.3
PICAL_MOUSE	0.043	0.12				PICAL_MOUSE	0.63	0.05				PICAL_MOUSE	0.046	0.13
AP2B1_MOUSE	0.0032	0.11				AP2B1_MOUSE	0.21	-0.05				AP2B1_MOUSE	0.051	-0.09	Regulated in G-CSF Only
SPHK2_MOUSE	0.023	0.6				SPHK2_MOUSE	0.16	0.32				SPHK2_MOUSE	0.052	0.44
NFS1_MOUSE	0.013	0.21				NFS1_MOUSE	0.28	0.07				NFS1_MOUSE	0.052	0.14
PURA1_MOUSE	0.035	-0.14				PURA1_MOUSE	0.14	0.08				PURA1_MOUSE	0.055	0.12
HEMH_MOUSE	0.045	0.22				HEMH_MOUSE	0.35	0.14				HEMH_MOUSE	0.063	0.19
SGTA_MOUSE	0.049	0.16				SGTA_MOUSE	0.35	0.07				SGTA_MOUSE	0.063	0.14
DRG2_MOUSE	0.022	0.32				DRG2_MOUSE	0.15	0.24				DRG2_MOUSE	0.064	0.2
CPSF6_MOUSE	0.021	0.58				CPSF6_MOUSE	0.43	0.27				CPSF6_MOUSE	0.069	0.59
DDX17_MOUSE	0.046	0.25				DDX17_MOUSE	0.59	-0.03				DDX17_MOUSE	0.07	0.19
AP1B1_MOUSE	0.0001	0.29				AP1B1_MOUSE	0.37	0.09				AP1B1_MOUSE	0.073	0.11
SNG1_MOUSE	0.013	0.29				SNG1_MOUSE	0.75	-0.05				SNG1_MOUSE	0.076	-0.19
PKHA6_MOUSE	0.033	0.3				PKHA6_MOUSE	0.12	0.23				PKHA6_MOUSE	0.078	0.28
SRS10_MOUSE	0.046	0.53				SRS10_MOUSE	0.15	0.38				SRS10_MOUSE	0.079	0.42
HNRPK_MOUSE	0.0019	0.25				HNRPK_MOUSE	0.84	0.04				HNRPK_MOUSE	0.082	0.13
SRSF7_MOUSE	0.02	0.28				SRSF7_MOUSE	0.056	0.19				SRSF7_MOUSE	0.084	0.16
MYO1D_MOUSE	0.042	-0.18				MYO1D_MOUSE	0.11	0.13				MYO1D_MOUSE	0.086	0.16
NEB2_MOUSE	0.021	0.2				NEB2_MOUSE	0.86	-0.01				NEB2_MOUSE	0.09	-0.14
VINC_MOUSE	0.0037	0.24				VINC_MOUSE	0.71	-0.02				VINC_MOUSE	0.091	0.15
BRSK1_MOUSE	0.028	0.48				BRSK1_MOUSE	0.29	0.17				BRSK1_MOUSE	0.094	0.28
AL1A7_MOUSE	0.036	-0.61				AL1A7_MOUSE	0.41	-0.18				AL1A7_MOUSE	0.094	-0.46
PSD12_MOUSE	0.005	0.33				PSD12_MOUSE	0.088	0.19				PSD12_MOUSE	0.1	0.16
NPM_MOUSE	0.022	0.2				NPM_MOUSE	0.15	0.1				NPM_MOUSE	0.1	0.13
ADA22_MOUSE	0.034	-0.21				ADA22_MOUSE	0.18	-0.15				ADA22_MOUSE	0.1	-0.15
LIMC1_MOUSE	0.015	0.48				LIMC1_MOUSE	0.4	0.17				LIMC1_MOUSE	0.1	0.29
EFTU_MOUSE	0.044	0.08				EFTU_MOUSE	0.93	0				EFTU_MOUSE	0.1	0.06
PLCX3_MOUSE	0.032	0.3				PLCX3_MOUSE	0.061	0.18				PLCX3_MOUSE	0.11	0.16
PTBP2_MOUSE	0.0028	0.36				PTBP2_MOUSE	0.068	0.2				PTBP2_MOUSE	0.11	0.18
KCC2D_MOUSE	0.0001	0.31				KCC2D_MOUSE	0.081	0.15				KCC2D_MOUSE	0.11	0.14
C99L2_MOUSE	0.033	-0.45				C99L2_MOUSE	0.095	-0.43				C99L2_MOUSE	0.11	-0.57
NOLC1_MOUSE	0.0092	0.34				NOLC1_MOUSE	0.18	0.19				NOLC1_MOUSE	0.12	0.17
E41L2_MOUSE	0.042	-0.12				E41L2_MOUSE	0.75	-0.01				E41L2_MOUSE	0.12	-0.09
RS4X_MOUSE	0.011	0.29				RS4X_MOUSE	0.26	0.12				RS4X_MOUSE	0.13	0.15
EXOC1_MOUSE	0.039	0.27				EXOC1_MOUSE	0.29	0.13				EXOC1_MOUSE	0.13	0.17
KIF3A_MOUSE	0.033	0.29				KIF3A_MOUSE	0.54	-0.07				KIF3A_MOUSE	0.13	0.17
F120A_MOUSE	0.0014	0.45				F120A_MOUSE	0.21	0.16				F120A_MOUSE	0.14	0.19
VATF_MOUSE	0.011	0.19				VATF_MOUSE	0.45	0.06				VATF_MOUSE	0.14	0.11
MLEC_MOUSE	0.0002	0.55				MLEC_MOUSE	0.54	0.08				MLEC_MOUSE	0.14	0.21
BCAS1_MOUSE	0.011	-0.17				BCAS1_MOUSE	0.99	0				BCAS1_MOUSE	0.14	0.1
RL3_MOUSE	0.01	0.17				RL3_MOUSE	0.23	0.06				RL3_MOUSE	0.15	0.08
SDHA_MOUSE	0.038	0.1				SDHA_MOUSE	0.29	-0.05				SDHA_MOUSE	0.15	-0.07
ACS2L_MOUSE	0.043	0.36				ACS2L_MOUSE	0.33	0.14				ACS2L_MOUSE	0.15	0.22
HS105_MOUSE	0.03	0.25				HS105_MOUSE	0.12	-0.11				HS105_MOUSE	0.16	-0.1
AN32A_MOUSE	0.024	0.28				AN32A_MOUSE	0.37	0.08				AN32A_MOUSE	0.16	0.14
SCRN1_MOUSE	0.023	-0.17				SCRN1_MOUSE	0.15	-0.09				SCRN1_MOUSE	0.17	-0.1
RL28_MOUSE	0.0095	0.21				RL28_MOUSE	0.24	0.1				RL28_MOUSE	0.17	0.1
SAE1_MOUSE	0.0038	0.25				SAE1_MOUSE	0.28	0.08				SAE1_MOUSE	0.17	0.1
F213A_MOUSE	0.0027	0.14				F213A_MOUSE	0.32	0.05				F213A_MOUSE	0.17	0.07
CTNB1_MOUSE	0.04	0.18				CTNB1_MOUSE	0.99	-0.01				CTNB1_MOUSE	0.17	-0.11
SYYM_MOUSE	0.0007	0.29				SYYM_MOUSE	0.057	0.16				SYYM_MOUSE	0.18	0.11
EVL_MOUSE	0.00093	0.32				EVL_MOUSE	0.14	0.12				EVL_MOUSE	0.18	0.13
PARK7_MOUSE	0.0076	-0.18				PARK7_MOUSE	0.28	-0.08				PARK7_MOUSE	0.19	-0.07
WDR13_MOUSE	0.019	0.25				WDR13_MOUSE	0.93	-0.01				WDR13_MOUSE	0.19	0.15
DCLK1_MOUSE	0.011	0.23				DCLK1_MOUSE	0.09	0.15				DCLK1_MOUSE	0.2	0.09
FA49A_MOUSE	0.016	0.23				FA49A_MOUSE	0.13	0.3				FA49A_MOUSE	0.2	0.21
QCR2_MOUSE	0.012	0.12				QCR2_MOUSE	0.3	0.04				QCR2_MOUSE	0.2	-0.06
HYOU1_MOUSE	0.0092	0.18				HYOU1_MOUSE	0.99	0.02				HYOU1_MOUSE	0.2	0.08
AP3B2_MOUSE	0.0029	0.11				AP3B2_MOUSE	0.96	0				AP3B2_MOUSE	0.21	0.05
CTRO_MOUSE	0.0044	0.23				CTRO_MOUSE	0.078	0.14				CTRO_MOUSE	0.22	-0.11
ODO1_MOUSE	0.045	0.09				ODO1_MOUSE	0.12	0.07				ODO1_MOUSE	0.22	0.05
HNRPQ_MOUSE	0.00039	0.22				HNRPQ_MOUSE	0.27	0.06				HNRPQ_MOUSE	0.22	0.07
FUBP2_MOUSE	0.015	0.18				FUBP2_MOUSE	0.066	0.11				FUBP2_MOUSE	0.23	0.09
MYPR_MOUSE	0.00061	-0.37				MYPR_MOUSE	0.74	-0.02				MYPR_MOUSE	0.23	-0.1
SF3B1_MOUSE	0.023	0.28				SF3B1_MOUSE	0.81	0.01				SF3B1_MOUSE	0.23	0.07
NOP56_MOUSE	0.0024	0.35				NOP56_MOUSE	0.15	0.15				NOP56_MOUSE	0.24	0.11
DDI2_MOUSE	0.026	0.29				DDI2_MOUSE	0.2	0.13				DDI2_MOUSE	0.24	0.12
GUAA_MOUSE	0.022	0.17				GUAA_MOUSE	0.39	0.04				GUAA_MOUSE	0.24	-0.06
TIF1B_MOUSE	0.026	0.33				TIF1B_MOUSE	0.49	0.12				TIF1B_MOUSE	0.24	0.17
NDUV2_MOUSE	0.0066	0.19				NDUV2_MOUSE	0.08	0.09				NDUV2_MOUSE	0.25	0.08
SCN8A_MOUSE	0.036	-0.41				SCN8A_MOUSE	0.1	-0.31				SCN8A_MOUSE	0.25	-0.19
PHB2_MOUSE	0.037	0.11				PHB2_MOUSE	0.6	-0.02				PHB2_MOUSE	0.25	-0.05
ATAD3_MOUSE	0.034	0.33				ATAD3_MOUSE	0.78	-0.03				ATAD3_MOUSE	0.25	0.17
ADT1_MOUSE	0.0018	0.18				ADT1_MOUSE	0.13	0.08				ADT1_MOUSE	0.26	-0.08
PYGM_MOUSE	0.00038	-0.29				PYGM_MOUSE	0.23	-0.06				PYGM_MOUSE	0.26	-0.08
ARVC_MOUSE	0.00097	0.39				ARVC_MOUSE	0.41	0.1				ARVC_MOUSE	0.26	0.09
GAK_MOUSE	0.029	0.21				GAK_MOUSE	0.13	0.14				GAK_MOUSE	0.27	0.16
KAP3_MOUSE	0.00028	0.29				KAP3_MOUSE	0.14	0.12				KAP3_MOUSE	0.27	0.07
COR1C_MOUSE	0.0069	0.23				COR1C_MOUSE	0.079	0.15				COR1C_MOUSE	0.28	0.08
MIC19_MOUSE	0.00041	0.22				MIC19_MOUSE	0.11	0.09				MIC19_MOUSE	0.28	0.06
HNRPU_MOUSE	0.0028	0.23				HNRPU_MOUSE	0.24	0.09				HNRPU_MOUSE	0.28	0.06
GHC1_MOUSE	0.043	0.29				GHC1_MOUSE	0.88	-0.02				GHC1_MOUSE	0.28	-0.14
AMPH_MOUSE	0.0001	0.22				AMPH_MOUSE	0.64	0.05				AMPH_MOUSE	0.29	0.05
MOBP_MOUSE	0.025	-0.39				MOBP_MOUSE	0.92	-0.01				MOBP_MOUSE	0.29	0.1
RL7_MOUSE	0.024	0.17				RL7_MOUSE	0.16	0.12				RL7_MOUSE	0.3	0.09
MIC26_MOUSE	0.017	0.21				MIC26_MOUSE	0.74	0.03				MIC26_MOUSE	0.3	-0.1
LANC2_MOUSE	0.027	0.23				LANC2_MOUSE	0.86	0.03				LANC2_MOUSE	0.31	0.09
HNRPC_MOUSE	0.0047	0.22				HNRPC_MOUSE	0.94	0.01				HNRPC_MOUSE	0.31	0.09
PGCB_MOUSE	0.03	0.26				PGCB_MOUSE	0.13	0.17				PGCB_MOUSE	0.32	0.12
ETFB_MOUSE	0.0074	0.13				ETFB_MOUSE	0.47	0.03				ETFB_MOUSE	0.32	0.03
CEND_MOUSE	0.0017	0.19				CEND_MOUSE	0.17	0.07				CEND_MOUSE	0.33	0.06
SYFA_MOUSE	0.046	0.31				SYFA_MOUSE	0.32	0.18				SYFA_MOUSE	0.33	-0.13
CCAR2_MOUSE	0.01	0.4				CCAR2_MOUSE	0.85	-0.01				CCAR2_MOUSE	0.33	0.12
THIO_MOUSE	0.039	0.08				THIO_MOUSE	0.12	-0.1				THIO_MOUSE	0.35	0.03
SYJ2B_MOUSE	0.029	0.18				SYJ2B_MOUSE	0.52	0.05				SYJ2B_MOUSE	0.35	0.06
1433F_MOUSE	0.03	0.12				1433F_MOUSE	0.36	-0.04				1433F_MOUSE	0.36	-0.04
HINT2_MOUSE	0.03	0.21				HINT2_MOUSE	0.39	0.1				HINT2_MOUSE	0.36	0.09
LA_MOUSE	0.044	0.37				LA_MOUSE	0.4	0.11				LA_MOUSE	0.36	0.14
TR112_MOUSE	0.041	0.38				TR112_MOUSE	0.091	0.22				TR112_MOUSE	0.37	0.11
ERP29_MOUSE	0.049	0.15				ERP29_MOUSE	0.35	0.09				ERP29_MOUSE	0.37	0.06
MIC25_MOUSE	0.0039	0.45				MIC25_MOUSE	0.97	0.04				MIC25_MOUSE	0.37	0.14
PCBP3_MOUSE	0.023	0.37				PCBP3_MOUSE	0.057	0.31				PCBP3_MOUSE	0.38	0.16
ESYT1_MOUSE	0.018	0.55				ESYT1_MOUSE	0.077	0.51				ESYT1_MOUSE	0.38	0.25
CN37_MOUSE	0.00042	-0.18				CN37_MOUSE	0.19	0.05				CN37_MOUSE	0.38	0.04
HXK1_MOUSE	0.0001	0.13				HXK1_MOUSE	0.29	0.02				HXK1_MOUSE	0.38	-0.03
GNAZ_MOUSE	0.037	0.12				GNAZ_MOUSE	0.74	0.02				GNAZ_MOUSE	0.38	-0.07
ARLY_MOUSE	0.039	0.57				ARLY_MOUSE	0.78	0.1				ARLY_MOUSE	0.38	0.2
UGGG1_MOUSE	0.041	0.23				UGGG1_MOUSE	0.62	0.03				UGGG1_MOUSE	0.39	0.07
COX41_MOUSE	0.024	0.14				COX41_MOUSE	0.88	0.02				COX41_MOUSE	0.39	-0.05
COX1_MOUSE	0.0093	0.29				COX1_MOUSE	0.13	0.18				COX1_MOUSE	0.4	-0.11
PPR21_MOUSE	0.012	0.54				PPR21_MOUSE	0.55	0.09				PPR21_MOUSE	0.4	0.14
CDC37_MOUSE	0.022	0.18				CDC37_MOUSE	0.28	-0.11				CDC37_MOUSE	0.41	0.05
ACOT6_MOUSE	0.0037	1.45				ACOT6_MOUSE	0.39	0.81				ACOT6_MOUSE	0.41	0.72
CH10_MOUSE	0.0044	0.13				CH10_MOUSE	0.55	0.02				CH10_MOUSE	0.41	0.04
PRP8_MOUSE	0.04	0.5				PRP8_MOUSE	0.62	-0.11				PRP8_MOUSE	0.41	0.13
WBP11_MOUSE	0.0085	0.33				WBP11_MOUSE	0.64	-0.04				WBP11_MOUSE	0.41	0.13
MCU_MOUSE	0.0028	0.23				MCU_MOUSE	0.12	0.1				MCU_MOUSE	0.43	0.04
TTYH1_MOUSE	0.014	0.21				TTYH1_MOUSE	0.95	0				TTYH1_MOUSE	0.43	-0.06
PABP1_MOUSE	0.046	0.12				PABP1_MOUSE	0.26	0.07				PABP1_MOUSE	0.44	0.05
PCCA_MOUSE	0.023	0.14				PCCA_MOUSE	0.8	0.01				PCCA_MOUSE	0.44	0.05
ENPP6_MOUSE	0.0001	-0.38				ENPP6_MOUSE	0.98	-0.01				ENPP6_MOUSE	0.44	0.05
NACAM_MOUSE	0.019	0.2				NACAM_MOUSE	0.2	0.12				NACAM_MOUSE	0.45	0.06
DMXL2_MOUSE	0.031	0.12				DMXL2_MOUSE	0.18	0.07				DMXL2_MOUSE	0.46	0.04
KCC1A_MOUSE	0.0088	0.28				KCC1A_MOUSE	0.34	0.09				KCC1A_MOUSE	0.46	0.06
ANS1B_MOUSE	0.02	0.48				ANS1B_MOUSE	0.34	0.15				ANS1B_MOUSE	0.46	0.07
TBB3_MOUSE	0.0001	-0.19				TBB3_MOUSE	0.38	-0.03				TBB3_MOUSE	0.46	-0.02
QCR1_MOUSE	0.021	0.18				QCR1_MOUSE	0.47	0.07				QCR1_MOUSE	0.46	-0.05
IVD_MOUSE	0.025	0.12				IVD_MOUSE	0.52	0.03				IVD_MOUSE	0.46	0.03
PURA_MOUSE	0.015	0.21				PURA_MOUSE	0.95	0.02				PURA_MOUSE	0.46	-0.05
ODP2_MOUSE	0.0024	0.2				ODP2_MOUSE	0.99	0.02				ODP2_MOUSE	0.46	0.05
COPB_MOUSE	0.023	0.24				COPB_MOUSE	0.07	0.18				COPB_MOUSE	0.47	0.08
AL1L1_MOUSE	0.037	0.1				AL1L1_MOUSE	0.28	0.05				AL1L1_MOUSE	0.47	-0.02
PFKAL_MOUSE	0.035	0.11				PFKAL_MOUSE	0.13	-0.1				PFKAL_MOUSE	0.48	0.04
RGRF2_MOUSE	0.0062	0.55				RGRF2_MOUSE	0.3	0.17				RGRF2_MOUSE	0.48	0.09
NFASC_MOUSE	0.004	0.14				NFASC_MOUSE	0.077	0.09				NFASC_MOUSE	0.5	0.03
OTUB1_MOUSE	0.045	0.12				OTUB1_MOUSE	0.083	0.08				OTUB1_MOUSE	0.5	-0.03
MMSA_MOUSE	0.04	0.13				MMSA_MOUSE	0.89	-0.01				MMSA_MOUSE	0.5	-0.06
SYNJ1_MOUSE	0.046	0.08				SYNJ1_MOUSE	0.24	0.04				SYNJ1_MOUSE	0.51	-0.03
LETM1_MOUSE	0.045	0.12				LETM1_MOUSE	0.33	-0.05				LETM1_MOUSE	0.51	0.05
BT3L4_MOUSE	0.022	0.3				BT3L4_MOUSE	0.63	0.05				BT3L4_MOUSE	0.51	-0.06
LNEBL_MOUSE	0.035	0.14				LNEBL_MOUSE	0.97	0.01				LNEBL_MOUSE	0.51	0.05
TDRKH_MOUSE	0.038	0.22				TDRKH_MOUSE	0.22	0.13				TDRKH_MOUSE	0.52	0.06
DYN1_MOUSE	0.0084	0.11				DYN1_MOUSE	0.37	0.04				DYN1_MOUSE	0.52	0.02
RL34_MOUSE	0.044	0.17				RL34_MOUSE	0.61	-0.05				RL34_MOUSE	0.52	-0.06
GSTM7_MOUSE	0.037	-0.24				GSTM7_MOUSE	0.93	0				GSTM7_MOUSE	0.52	0.09
PUR8_MOUSE	0.016	-0.18				PUR8_MOUSE	0.19	0.07				PUR8_MOUSE	0.53	-0.03
SUGP2_MOUSE	0.022	0.26				SUGP2_MOUSE	0.48	0.08				SUGP2_MOUSE	0.53	0.04
EEA1_MOUSE	0.0052	0.33				EEA1_MOUSE	0.094	0.25				EEA1_MOUSE	0.54	0.12
SFXN1_MOUSE	0.0047	0.21				SFXN1_MOUSE	0.35	0.06				SFXN1_MOUSE	0.54	0.06
WDR1_MOUSE	0.012	0.15				WDR1_MOUSE	0.88	0.03				WDR1_MOUSE	0.54	-0.02
SFPQ_MOUSE	0.0057	0.23				SFPQ_MOUSE	0.13	0.13				SFPQ_MOUSE	0.55	0.06
COPG1_MOUSE	0.023	0.33				COPG1_MOUSE	0.25	0.14				COPG1_MOUSE	0.56	0.06
RL6_MOUSE	0.00098	0.27				RL6_MOUSE	0.27	0.07				RL6_MOUSE	0.56	0.06
GSTT3_MOUSE	0.02	0.31				GSTT3_MOUSE	0.82	-0.01				GSTT3_MOUSE	0.57	0.06
UBXN4_MOUSE	0.032	0.45				UBXN4_MOUSE	0.92	0.01				UBXN4_MOUSE	0.57	-0.09
MIC60_MOUSE	0.0001	0.14				MIC60_MOUSE	0.079	0.05				MIC60_MOUSE	0.58	0.01
CP46A_MOUSE	0.007	0.38				CP46A_MOUSE	0.33	-0.11				CP46A_MOUSE	0.59	-0.06
EAA2_MOUSE	0.0001	0.22				EAA2_MOUSE	0.25	0.07				EAA2_MOUSE	0.6	0.03
ACTN1_MOUSE	0.028	0.21				ACTN1_MOUSE	0.71	-0.04				ACTN1_MOUSE	0.6	0.06
VP33B_MOUSE	0.049	0.22				VP33B_MOUSE	0.05	0.2				VP33B_MOUSE	0.61	0.08
E41L1_MOUSE	0.024	-0.12				E41L1_MOUSE	0.092	-0.1				E41L1_MOUSE	0.61	-0.02
HNRPM_MOUSE	0.021	0.51				HNRPM_MOUSE	0.12	0.21				HNRPM_MOUSE	0.61	0.08
NAC2_MOUSE	0.028	0.2				NAC2_MOUSE	0.58	0.03				NAC2_MOUSE	0.61	0.04
CAMKV_MOUSE	0.0043	0.39				CAMKV_MOUSE	0.34	-0.09				CAMKV_MOUSE	0.62	0.04
GNA13_MOUSE	0.028	0.23				GNA13_MOUSE	0.13	0.15				GNA13_MOUSE	0.63	-0.02
CNTN2_MOUSE	0.027	-0.15				CNTN2_MOUSE	0.15	0.08				CNTN2_MOUSE	0.63	-0.02
PLXA4_MOUSE	0.02	0.14				PLXA4_MOUSE	0.19	0.1				PLXA4_MOUSE	0.63	0.03
AMPD2_MOUSE	0.019	0.16				AMPD2_MOUSE	0.14	0.06				AMPD2_MOUSE	0.64	-0.03
NOS1_MOUSE	0.0013	0.37				NOS1_MOUSE	0.073	0.18				NOS1_MOUSE	0.65	0.05
GLPK_MOUSE	0.0075	0.36				GLPK_MOUSE	0.12	0.23				GLPK_MOUSE	0.65	0.05
MACF1_MOUSE	0.017	0.16				MACF1_MOUSE	0.45	0.06				MACF1_MOUSE	0.65	-0.01
CDK5_MOUSE	0.045	0.15				CDK5_MOUSE	0.62	0.05				CDK5_MOUSE	0.65	0.04
CSKI1_MOUSE	0.00076	0.14				CSKI1_MOUSE	0.32	0.06				CSKI1_MOUSE	0.66	0.02
CLH1_MOUSE	0.002	0.13				CLH1_MOUSE	0.64	0.02				CLH1_MOUSE	0.66	-0.01
LARP1_MOUSE	0.015	0.23				LARP1_MOUSE	0.12	0.17				LARP1_MOUSE	0.67	-0.04
RALY_MOUSE	0.039	0.35				RALY_MOUSE	0.64	0.09				RALY_MOUSE	0.69	-0.03
ITSN1_MOUSE	0.0011	0.28				ITSN1_MOUSE	0.68	0.06				ITSN1_MOUSE	0.7	0.04
STX1A_MOUSE	0.014	0.2				STX1A_MOUSE	0.87	-0.01				STX1A_MOUSE	0.7	-0.03
SODM_MOUSE	0.036	0.15				SODM_MOUSE	0.26	0.07				SODM_MOUSE	0.71	-0.02
PRPTZ_MOUSE	0.04	0.18				PRPTZ_MOUSE	0.62	0.03				PRPTZ_MOUSE	0.71	-0.04
S6A11_MOUSE	0.0049	0.16				S6A11_MOUSE	0.74	0.02				S6A11_MOUSE	0.71	-0.03
AL4A1_MOUSE	0.0088	0.23				AL4A1_MOUSE	0.25	0.09				AL4A1_MOUSE	0.72	0.05
SYUG_MOUSE	0.0061	-0.19				SYUG_MOUSE	0.82	-0.01				SYUG_MOUSE	0.72	-0.03
IPYR_MOUSE	0.014	-0.12				IPYR_MOUSE	0.96	0				IPYR_MOUSE	0.72	0.02
4F2_MOUSE	0.0064	0.16				4F2_MOUSE	0.21	-0.05				4F2_MOUSE	0.73	0.04
PLIN3_MOUSE	0.015	-0.46				PLIN3_MOUSE	0.18	0.32				PLIN3_MOUSE	0.74	-0.05
SYTC_MOUSE	0.046	0.13				SYTC_MOUSE	0.32	0.06				SYTC_MOUSE	0.74	0.03
GORS2_MOUSE	0.038	0.27				GORS2_MOUSE	0.25	0.13				GORS2_MOUSE	0.75	0.04
ATPD_MOUSE	0.031	0.14				ATPD_MOUSE	0.81	-0.02				ATPD_MOUSE	0.75	0.03
SNX16_MOUSE	0.037	0.3				SNX16_MOUSE	0.91	-0.03				SNX16_MOUSE	0.75	0.07
PGAM5_MOUSE	0.03	0.26				PGAM5_MOUSE	0.15	0.2				PGAM5_MOUSE	0.77	0
DLG3_MOUSE	0.0032	0.33				DLG3_MOUSE	0.6	-0.05				DLG3_MOUSE	0.77	-0.02
TIM29_MOUSE	0.035	0.23				TIM29_MOUSE	0.45	-0.09				TIM29_MOUSE	0.79	0.02
CA2D1_MOUSE	0.024	0.13				CA2D1_MOUSE	0.88	0				CA2D1_MOUSE	0.79	0.01
ABHGA_MOUSE	0.049	-0.22				ABHGA_MOUSE	0.91	-0.03				ABHGA_MOUSE	0.8	0.01
ILEUA_MOUSE	0.041	-0.18				ILEUA_MOUSE	0.13	0.1				ILEUA_MOUSE	0.82	0.04
AT2B4_MOUSE	0.005	0.32				AT2B4_MOUSE	0.97	0.01				AT2B4_MOUSE	0.82	0.04
K1468_MOUSE	0.00043	0.29				K1468_MOUSE	0.2	0.09				K1468_MOUSE	0.83	-0.01
PSD3_MOUSE	0.041	0.22				PSD3_MOUSE	0.2	0.12				PSD3_MOUSE	0.83	0.03
MAP6_MOUSE	0.038	0.05				MAP6_MOUSE	0.42	0.02				MAP6_MOUSE	0.83	-0.01
COR1A_MOUSE	0.0074	0.27				COR1A_MOUSE	0.48	0.03				COR1A_MOUSE	0.83	-0.01
ATP5I_MOUSE	0.04	0.18				ATP5I_MOUSE	0.97	0				ATP5I_MOUSE	0.83	-0.02
ZFR_MOUSE	0.03	0.3				ZFR_MOUSE	0.24	0.2				ZFR_MOUSE	0.84	-0.01
MPPA_MOUSE	0.031	0.19				MPPA_MOUSE	0.53	-0.09				MPPA_MOUSE	0.84	-0.02
DX39B_MOUSE	0.021	0.36				DX39B_MOUSE	0.088	0.2				DX39B_MOUSE	0.85	0.01
RP3A_MOUSE	0.0026	0.24				RP3A_MOUSE	0.46	0.06				RP3A_MOUSE	0.85	-0.01
G3BP2_MOUSE	0.039	0.32				G3BP2_MOUSE	0.86	-0.04				G3BP2_MOUSE	0.85	-0.02
CSN7A_MOUSE	0.013	0.28				CSN7A_MOUSE	0.099	0.14				CSN7A_MOUSE	0.86	0.01
RL13_MOUSE	0.01	0.34				RL13_MOUSE	0.2	0.18				RL13_MOUSE	0.87	0.02
IQEC2_MOUSE	0.0063	0.42				IQEC2_MOUSE	0.4	0.17				IQEC2_MOUSE	0.87	-0.02
CLD11_MOUSE	0.0013	-0.34				CLD11_MOUSE	0.51	-0.05				CLD11_MOUSE	0.87	-0.01
TPR_MOUSE	0.029	0.36				TPR_MOUSE	0.063	0.28				TPR_MOUSE	0.88	0.03
MAP1A_MOUSE	0.0073	-0.07				MAP1A_MOUSE	0.15	0.03				MAP1A_MOUSE	0.9	0
FBLL1_MOUSE	0.005	0.32				FBLL1_MOUSE	0.46	0.08				FBLL1_MOUSE	0.9	-0.01
MPP6_MOUSE	0.031	0.16				MPP6_MOUSE	0.62	-0.03				MPP6_MOUSE	0.9	0.01
MFR1L_MOUSE	0.041	0.16				MFR1L_MOUSE	0.32	0.06				MFR1L_MOUSE	0.91	0.03
ACOT2_MOUSE	0.042	0.25				ACOT2_MOUSE	0.25	-0.1				ACOT2_MOUSE	0.92	0
CLIP2_MOUSE	0.043	0.14				CLIP2_MOUSE	0.58	0.04				CLIP2_MOUSE	0.92	0.01
SNTA1_MOUSE	0.029	0.34				SNTA1_MOUSE	0.95	0.03				SNTA1_MOUSE	0.92	0
CTL1_MOUSE	0.01	-0.23				CTL1_MOUSE	0.27	-0.08				CTL1_MOUSE	0.93	0.02
CPLX1_MOUSE	0.027	-0.36				CPLX1_MOUSE	0.35	-0.13				CPLX1_MOUSE	0.93	-0.02
RS16_MOUSE	0.03	0.14				RS16_MOUSE	0.74	0.02				RS16_MOUSE	0.93	-0.01
PSMD5_MOUSE	0.023	0.14				PSMD5_MOUSE	0.54	-0.04				PSMD5_MOUSE	0.94	-0.01
CLUS_MOUSE	0.025	0.3				CLUS_MOUSE	0.92	0.02				CLUS_MOUSE	0.94	0.01
SF3B3_MOUSE	0.025	0.27				SF3B3_MOUSE	0.24	0.14				SF3B3_MOUSE	0.95	0.02
SPRL1_MOUSE	0.011	0.25				SPRL1_MOUSE	0.29	0.09				SPRL1_MOUSE	0.95	0.01
HACD3_MOUSE	0.0034	0.28				HACD3_MOUSE	0.06	0.16				HACD3_MOUSE	0.96	-0.01
RBGP1_MOUSE	0.036	0.18				RBGP1_MOUSE	0.82	-0.02				RBGP1_MOUSE	0.96	0
SRC8_MOUSE	0.023	0.15				SRC8_MOUSE	0.33	-0.07				SRC8_MOUSE	0.99	0
VATB2_MOUSE	0.0041	0.1				VATB2_MOUSE	0.69	0.01				VATB2_MOUSE	1	0
MYL6_MOUSE	0.084	-0.18				MYL6_MOUSE	0.007	-0.32				MYL6_MOUSE	0.0001	0.48	Regulated in Coc & G-CSF + Cocaine Groups
GABT_MOUSE	0.12	-0.06				GABT_MOUSE	0.027	-0.09				GABT_MOUSE	0.0001	-0.16
BSN_MOUSE	0.49	0.03				BSN_MOUSE	0.00067	-0.17				BSN_MOUSE	0.00049	-0.18
VPP1_MOUSE	0.63	-0.02				VPP1_MOUSE	0.0001	-0.18				VPP1_MOUSE	0.001	-0.14
TPM4_MOUSE	0.2	0.11				TPM4_MOUSE	0.02	0.19				TPM4_MOUSE	0.001	0.27
1433B_MOUSE	0.92	-0.01				1433B_MOUSE	0.025	-0.11				1433B_MOUSE	0.0023	-0.17
PLEC_MOUSE	0.42	0.02				PLEC_MOUSE	0.0001	0.13				PLEC_MOUSE	0.0028	0.11
NCDN_MOUSE	0.22	-0.05				NCDN_MOUSE	0.00085	-0.15				NCDN_MOUSE	0.0038	-0.16
CSKP_MOUSE	0.34	-0.06				CSKP_MOUSE	0.0042	-0.22				CSKP_MOUSE	0.004	-0.21
DOPD_MOUSE	0.53	-0.05				DOPD_MOUSE	0.0034	-0.22				DOPD_MOUSE	0.0041	-0.22
KCJ10_MOUSE	0.54	-0.12				KCJ10_MOUSE	0.0014	-0.43				KCJ10_MOUSE	0.0045	-0.29
CALX_MOUSE	0.094	0.08				CALX_MOUSE	0.014	0.11				CALX_MOUSE	0.0046	0.13
FNBP1_MOUSE	0.17	0.14				FNBP1_MOUSE	0.012	0.25				FNBP1_MOUSE	0.0052	0.31
DPYL3_MOUSE	0.21	0.09				DPYL3_MOUSE	0.021	0.13				DPYL3_MOUSE	0.0053	0.13
PCLO_MOUSE	0.89	0.01				PCLO_MOUSE	0.0001	-0.25				PCLO_MOUSE	0.0058	-0.15
AINX_MOUSE	0.17	-0.08				AINX_MOUSE	0.00075	0.17				AINX_MOUSE	0.0058	0.13
SYN1_MOUSE	0.29	-0.04				SYN1_MOUSE	0.00095	-0.15				SYN1_MOUSE	0.0059	-0.14
VA0D1_MOUSE	0.2	-0.08				VA0D1_MOUSE	0.0046	-0.27				VA0D1_MOUSE	0.0063	-0.27
HBA_MOUSE	0.32	-0.06				HBA_MOUSE	0.0001	0.21				HBA_MOUSE	0.0066	0.21
SYT1_MOUSE	0.37	-0.07				SYT1_MOUSE	0.0017	-0.28				SYT1_MOUSE	0.007	-0.22
PDXK_MOUSE	0.16	-0.08				PDXK_MOUSE	0.016	-0.14				PDXK_MOUSE	0.0077	-0.14
TPIS_MOUSE	0.48	-0.03				TPIS_MOUSE	0.0082	-0.08				TPIS_MOUSE	0.0079	-0.09
KI21A_MOUSE	0.47	0.06				KI21A_MOUSE	0.017	0.12				KI21A_MOUSE	0.0079	0.2
ENOA_MOUSE	0.08	-0.06				ENOA_MOUSE	0.00012	-0.13				ENOA_MOUSE	0.0086	-0.09
BIN1_MOUSE	0.24	0.05				BIN1_MOUSE	0.041	0.1				BIN1_MOUSE	0.0097	0.12
CADM2_MOUSE	0.063	-0.3				CADM2_MOUSE	0.0081	-0.36				CADM2_MOUSE	0.01	-0.34
ELAV1_MOUSE	0.25	0.2				ELAV1_MOUSE	0.045	0.23				ELAV1_MOUSE	0.01	0.29
TINAL_MOUSE	0.075	0.42				TINAL_MOUSE	0.014	0.56				TINAL_MOUSE	0.011	0.6
L1CAM_MOUSE	0.13	-0.19				L1CAM_MOUSE	0.028	-0.23				L1CAM_MOUSE	0.013	-0.24
MAOX_MOUSE	0.12	0.13				MAOX_MOUSE	0.025	0.2				MAOX_MOUSE	0.014	0.18
GBRL2_MOUSE	0.31	0.07				GBRL2_MOUSE	0.039	0.23				GBRL2_MOUSE	0.014	0.19
LDHA_MOUSE	0.96	-0.01				LDHA_MOUSE	0.0001	-0.33				LDHA_MOUSE	0.015	-0.17
VPS35_MOUSE	0.78	0.01				VPS35_MOUSE	0.021	-0.16				VPS35_MOUSE	0.015	-0.17
AL7A1_MOUSE	0.89	0.01				AL7A1_MOUSE	0.024	-0.11				AL7A1_MOUSE	0.015	-0.14
REEP2_MOUSE	0.088	0.3				REEP2_MOUSE	0.021	0.21				REEP2_MOUSE	0.017	0.23
TMM65_MOUSE	0.28	0.1				TMM65_MOUSE	0.038	0.2				TMM65_MOUSE	0.017	0.23
UBL4A_MOUSE	0.4	0.05				UBL4A_MOUSE	0.00034	0.2				UBL4A_MOUSE	0.019	0.15
CHIP_MOUSE	0.94	0.05				CHIP_MOUSE	0.036	-0.49				CHIP_MOUSE	0.019	-0.47
TMOD2_MOUSE	0.2	0.06				TMOD2_MOUSE	0.022	0.1				TMOD2_MOUSE	0.022	0.14
KHDR2_MOUSE	0.1	0.29				KHDR2_MOUSE	0.038	0.2				KHDR2_MOUSE	0.022	0.21
TFAM_MOUSE	0.5	-0.38				TFAM_MOUSE	0.044	0.38				TFAM_MOUSE	0.023	0.37
SQSTM_MOUSE	0.45	0.11				SQSTM_MOUSE	0.049	0.39				SQSTM_MOUSE	0.023	0.39
NFL_MOUSE	0.052	-0.14				NFL_MOUSE	0.0038	0.22				NFL_MOUSE	0.024	0.14
TCTP_MOUSE	0.76	0.02				TCTP_MOUSE	0.049	0.13				TCTP_MOUSE	0.025	0.16
LGI1_MOUSE	0.07	-0.17				LGI1_MOUSE	0.01	-0.28				LGI1_MOUSE	0.026	-0.16
SNAA_MOUSE	0.6	-0.02				SNAA_MOUSE	0.029	-0.11				SNAA_MOUSE	0.027	-0.15
SYUA_MOUSE	0.086	-0.23				SYUA_MOUSE	0.0023	-0.43				SYUA_MOUSE	0.028	-0.26
PALM2_MOUSE	0.17	0.08				PALM2_MOUSE	0.028	0.14				PALM2_MOUSE	0.028	0.14
ARC1A_MOUSE	0.57	-0.07				ARC1A_MOUSE	0.036	-0.22				ARC1A_MOUSE	0.028	-0.21
VWA1_MOUSE	0.064	0.56				VWA1_MOUSE	0.037	0.72				VWA1_MOUSE	0.028	0.74
SEP11_MOUSE	0.94	0.02				SEP11_MOUSE	0.013	-0.25				SEP11_MOUSE	0.032	-0.2
NCKP1_MOUSE	0.36	-0.11				NCKP1_MOUSE	0.021	-0.23				NCKP1_MOUSE	0.032	-0.22
CTNA2_MOUSE	0.25	0.14				CTNA2_MOUSE	0.041	-0.19				CTNA2_MOUSE	0.034	-0.19
EMAL1_MOUSE	0.12	0.13				EMAL1_MOUSE	0.015	0.16				EMAL1_MOUSE	0.035	0.15
RS10_MOUSE	0.12	0.25				RS10_MOUSE	0.0026	0.29				RS10_MOUSE	0.038	0.29
HBB1_MOUSE	0.22	0.09				HBB1_MOUSE	0.00023	0.25				HBB1_MOUSE	0.039	0.19
NIPS2_MOUSE	0.1	0.1				NIPS2_MOUSE	0.0049	0.18				NIPS2_MOUSE	0.039	0.12
SRBS1_MOUSE	0.84	0.06				SRBS1_MOUSE	0.038	0.29				SRBS1_MOUSE	0.039	0.29
MP2K4_MOUSE	0.54	0.08				MP2K4_MOUSE	0.0039	0.33				MP2K4_MOUSE	0.04	0.23
PGAM2_MOUSE	0.065	-0.55				PGAM2_MOUSE	0.016	-0.76				PGAM2_MOUSE	0.04	-0.6
LANC1_MOUSE	0.56	-0.06				LANC1_MOUSE	0.0041	-0.24				LANC1_MOUSE	0.041	-0.16
CYFP2_MOUSE	0.76	-0.04				CYFP2_MOUSE	0.017	-0.23				CYFP2_MOUSE	0.042	-0.21
PNPO_MOUSE	0.078	0.34				PNPO_MOUSE	0.04	0.61				PNPO_MOUSE	0.043	0.36
FGF1_MOUSE	0.13	0.33				FGF1_MOUSE	0.047	0.41				FGF1_MOUSE	0.045	0.44
STB5L_MOUSE	0.065	-0.17				STB5L_MOUSE	0.0054	-0.24				STB5L_MOUSE	0.046	-0.18
DNJC5_MOUSE	0.42	-0.1				DNJC5_MOUSE	0.0082	-0.31				DNJC5_MOUSE	0.046	-0.33
EMD_MOUSE	0.094	0.2				EMD_MOUSE	0.021	0.2				EMD_MOUSE	0.048	0.16
CA2D3_MOUSE	0.2	-0.37				CA2D3_MOUSE	0.009	-0.66				CA2D3_MOUSE	0.05	-0.5	Regulated in Coc only
S12A2_MOUSE	0.14	-0.1				S12A2_MOUSE	0.049	0.16				S12A2_MOUSE	0.053	0.13
MP2K1_MOUSE	0.34	-0.11				MP2K1_MOUSE	0.0002	-0.4				MP2K1_MOUSE	0.056	-0.21
DC1L2_MOUSE	0.32	-0.07				DC1L2_MOUSE	0.0087	0.14				DC1L2_MOUSE	0.058	0.1
BDH_MOUSE	0.23	0.11				BDH_MOUSE	0.026	0.16				BDH_MOUSE	0.058	0.14
PPM1F_MOUSE	0.97	0				PPM1F_MOUSE	0.025	0.22				PPM1F_MOUSE	0.064	0.17
CAPZB_MOUSE	0.1	-0.11				CAPZB_MOUSE	0.043	-0.14				CAPZB_MOUSE	0.064	-0.15
PROD_MOUSE	0.21	-0.14				PROD_MOUSE	0.016	-0.33				PROD_MOUSE	0.066	-0.42
HPCL4_MOUSE	0.71	-0.07				HPCL4_MOUSE	0.015	-0.4				HPCL4_MOUSE	0.067	-0.29
BCAM_MOUSE	0.32	0.26				BCAM_MOUSE	0.043	0.38				BCAM_MOUSE	0.068	0.33
SCAM3_MOUSE	0.31	-0.16				SCAM3_MOUSE	0.019	-0.35				SCAM3_MOUSE	0.069	-0.33
SEPT5_MOUSE	0.82	0				SEPT5_MOUSE	0.0073	-0.2				SEPT5_MOUSE	0.071	-0.13
2AAA_MOUSE	0.19	-0.07				2AAA_MOUSE	0.0092	-0.14				2AAA_MOUSE	0.071	-0.1
BCAT1_MOUSE	0.36	0.06				BCAT1_MOUSE	0.0079	0.16				BCAT1_MOUSE	0.076	0.13
UBE2K_MOUSE	0.64	0.02				UBE2K_MOUSE	0.01	0.15				UBE2K_MOUSE	0.077	0.1
IF2P_MOUSE	0.08	0.2				IF2P_MOUSE	0.026	0.28				IF2P_MOUSE	0.078	0.22
DRG1_MOUSE	0.07	0.42				DRG1_MOUSE	0.021	0.49				DRG1_MOUSE	0.081	0.49
GDIR1_MOUSE	0.074	-0.11				GDIR1_MOUSE	0.046	-0.12				GDIR1_MOUSE	0.09	-0.15
KCC2A_MOUSE	0.097	-0.18				KCC2A_MOUSE	0.0001	-0.53				KCC2A_MOUSE	0.094	-0.21
RAB8B_MOUSE	0.55	-0.05				RAB8B_MOUSE	0.042	-0.17				RAB8B_MOUSE	0.096	-0.13
ABLM2_MOUSE	0.5	0.1				ABLM2_MOUSE	0.0074	0.27				ABLM2_MOUSE	0.099	0.13
DCE1_MOUSE	0.19	-0.18				DCE1_MOUSE	0.0094	-0.32				DCE1_MOUSE	0.1	-0.21
IPYR2_MOUSE	0.27	0.08				IPYR2_MOUSE	0.00049	0.23				IPYR2_MOUSE	0.11	0.09
SRR_MOUSE	0.071	-0.61				SRR_MOUSE	0.0036	-1.23				SRR_MOUSE	0.11	-0.62
VPS50_MOUSE	0.14	-0.38				VPS50_MOUSE	0.036	-0.53				VPS50_MOUSE	0.11	-0.33
AKA12_MOUSE	0.55	0.05				AKA12_MOUSE	0.00059	0.25				AKA12_MOUSE	0.12	0.13
PI42B_MOUSE	0.33	-0.09				PI42B_MOUSE	0.0016	-0.21				PI42B_MOUSE	0.12	-0.1
SLK_MOUSE	0.64	-0.05				SLK_MOUSE	0.0041	-0.24				SLK_MOUSE	0.12	-0.14
TPC10_MOUSE	0.87	0.08				TPC10_MOUSE	0.048	0.63				TPC10_MOUSE	0.12	0.48
CLYBL_MOUSE	0.84	0.02				CLYBL_MOUSE	0.0032	0.23				CLYBL_MOUSE	0.13	0.14
ATPB_MOUSE	0.11	0.06				ATPB_MOUSE	0.00094	0.1				ATPB_MOUSE	0.14	0.04
AT1B3_MOUSE	0.15	0.17				AT1B3_MOUSE	0.0066	0.33				AT1B3_MOUSE	0.14	0.18
COR2A_MOUSE	0.14	0.61				COR2A_MOUSE	0.031	0.44				COR2A_MOUSE	0.14	0.36
ZNT1_MOUSE	0.47	-0.14				ZNT1_MOUSE	0.04	-0.43				ZNT1_MOUSE	0.14	-0.31
S4A10_MOUSE	0.16	0.27				S4A10_MOUSE	0.011	0.25				S4A10_MOUSE	0.15	0.15
ACSF2_MOUSE	0.98	0.01				ACSF2_MOUSE	0.021	0.23				ACSF2_MOUSE	0.15	0.13
RL26_MOUSE	0.056	0.19				RL26_MOUSE	0.025	0.23				RL26_MOUSE	0.15	0.15
PITH1_MOUSE	0.32	0.1				PITH1_MOUSE	0.035	0.18				PITH1_MOUSE	0.15	0.12
KPCG_MOUSE	0.11	-0.19				KPCG_MOUSE	0.00014	-0.52				KPCG_MOUSE	0.16	-0.18
CPIN1_MOUSE	0.33	0.08				CPIN1_MOUSE	0.02	0.16				CPIN1_MOUSE	0.16	0.09
SYNC_MOUSE	0.33	0.06				SYNC_MOUSE	0.031	0.1				SYNC_MOUSE	0.16	0.08
GARS_MOUSE	0.95	0				GARS_MOUSE	0.00053	0.21				GARS_MOUSE	0.17	0.07
AT1A1_MOUSE	0.2	-0.07				AT1A1_MOUSE	0.0016	-0.14				AT1A1_MOUSE	0.17	-0.06
SERC_MOUSE	0.28	-0.07				SERC_MOUSE	0.0091	0.12				SERC_MOUSE	0.17	0.06
K1107_MOUSE	0.29	-0.29				K1107_MOUSE	0.03	-0.66				K1107_MOUSE	0.17	-0.37
ARPC5_MOUSE	0.47	-0.09				ARPC5_MOUSE	0.033	-0.26				ARPC5_MOUSE	0.17	-0.15
CRIP2_MOUSE	0.5	-0.12				CRIP2_MOUSE	0.043	-0.41				CRIP2_MOUSE	0.17	-0.24
HSP74_MOUSE	0.36	0.03				HSP74_MOUSE	0.0035	-0.1				HSP74_MOUSE	0.18	-0.04
HNRH2_MOUSE	0.15	0.18				HNRH2_MOUSE	0.014	0.26				HNRH2_MOUSE	0.18	0.14
GPM6A_MOUSE	0.17	-0.13				GPM6A_MOUSE	0.017	-0.29				GPM6A_MOUSE	0.18	-0.12
CAZA1_MOUSE	0.16	0.18				CAZA1_MOUSE	0.02	0.26				CAZA1_MOUSE	0.18	0.2
SIK3_MOUSE	0.42	-0.12				SIK3_MOUSE	0.021	-0.25				SIK3_MOUSE	0.18	-0.11
RT36_MOUSE	0.3	0.11				RT36_MOUSE	0.031	0.19				RT36_MOUSE	0.18	0.13
SKP1_MOUSE	0.2	-0.15				SKP1_MOUSE	0.0017	-0.35				SKP1_MOUSE	0.19	-0.1
CISY_MOUSE	0.13	0.12				CISY_MOUSE	0.015	0.15				CISY_MOUSE	0.19	0.07
PACS1_MOUSE	0.083	-0.12				PACS1_MOUSE	0.023	-0.17				PACS1_MOUSE	0.19	-0.08
OSBL6_MOUSE	0.26	0.17				OSBL6_MOUSE	0.029	0.35				OSBL6_MOUSE	0.19	0.2
ARPC3_MOUSE	0.79	0.04				ARPC3_MOUSE	0.034	-0.26				ARPC3_MOUSE	0.2	-0.16
MYCB2_MOUSE	0.29	-0.2				MYCB2_MOUSE	0.036	-0.39				MYCB2_MOUSE	0.2	-0.23
E41L3_MOUSE	0.18	-0.04				E41L3_MOUSE	0.0018	0.08				E41L3_MOUSE	0.21	0.03
PDIA1_MOUSE	0.18	0.06				PDIA1_MOUSE	0.021	0.12				PDIA1_MOUSE	0.21	0.08
SYN3_MOUSE	0.089	-0.31				SYN3_MOUSE	0.033	-0.31				SYN3_MOUSE	0.21	-0.18
EF1B_MOUSE	0.3	0.12				EF1B_MOUSE	0.045	0.17				EF1B_MOUSE	0.21	0.12
LRP1_MOUSE	0.064	0.12				LRP1_MOUSE	0.027	0.11				LRP1_MOUSE	0.22	0.07
CTBP1_MOUSE	0.21	-0.13				CTBP1_MOUSE	0.0021	-0.27				CTBP1_MOUSE	0.23	-0.14
SPEE_MOUSE	0.069	-0.2				SPEE_MOUSE	0.016	-0.29				SPEE_MOUSE	0.23	-0.15
DPP3_MOUSE	0.92	-0.01				DPP3_MOUSE	0.02	-0.54				DPP3_MOUSE	0.23	-0.28
TRIM2_MOUSE	0.21	-0.12				TRIM2_MOUSE	0.037	-0.13				TRIM2_MOUSE	0.23	-0.09
PSA7_MOUSE	0.63	-0.06				PSA7_MOUSE	0.04	-0.2				PSA7_MOUSE	0.23	-0.1
NOVA1_MOUSE	0.28	0.22				NOVA1_MOUSE	0.045	0.32				NOVA1_MOUSE	0.23	0.17
WASF1_MOUSE	0.58	-0.1				WASF1_MOUSE	0.00095	-0.49				WASF1_MOUSE	0.24	-0.17
NFH_MOUSE	0.19	-0.09				NFH_MOUSE	0.0053	0.23				NFH_MOUSE	0.24	0.1
ACLY_MOUSE	0.58	-0.02				ACLY_MOUSE	0.0036	0.13				ACLY_MOUSE	0.25	0.05
GUAD_MOUSE	0.61	-0.06				GUAD_MOUSE	0.0001	-0.59				GUAD_MOUSE	0.26	-0.14
GPX1_MOUSE	0.051	-0.21				GPX1_MOUSE	0.01	-0.33				GPX1_MOUSE	0.27	-0.11
CLAP1_MOUSE	0.17	0.09				CLAP1_MOUSE	0.0001	0.22				CLAP1_MOUSE	0.28	0.08
ITPA_MOUSE	0.71	-0.06				ITPA_MOUSE	0.032	-0.32				ITPA_MOUSE	0.28	-0.1
PRS8_MOUSE	0.11	0.18				PRS8_MOUSE	0.047	0.18				PRS8_MOUSE	0.28	0.09
LIS1_MOUSE	0.43	-0.05				LIS1_MOUSE	0.035	-0.13				LIS1_MOUSE	0.29	-0.06
CAPS1_MOUSE	0.061	0.1				CAPS1_MOUSE	0.0072	0.13				CAPS1_MOUSE	0.31	0.05
GIT1_MOUSE	0.25	-0.11				GIT1_MOUSE	0.041	-0.21				GIT1_MOUSE	0.31	0.09
CAP2_MOUSE	0.54	-0.07				CAP2_MOUSE	0.0064	-0.35				CAP2_MOUSE	0.32	-0.12
HECD3_MOUSE	0.24	-0.14				HECD3_MOUSE	0.016	-0.22				HECD3_MOUSE	0.32	-0.17
ECHB_MOUSE	0.16	0.08				ECHB_MOUSE	0.018	0.13				ECHB_MOUSE	0.32	0.05
CHAP1_MOUSE	0.069	-0.65				CHAP1_MOUSE	0.036	-0.49				CHAP1_MOUSE	0.32	-0.34
ALDOA_MOUSE	0.23	-0.04				ALDOA_MOUSE	0.0024	-0.11				ALDOA_MOUSE	0.33	-0.02
GTR3_MOUSE	0.57	-0.08				GTR3_MOUSE	0.0034	-0.29				GTR3_MOUSE	0.33	-0.1
ATX10_MOUSE	0.68	0.03				ATX10_MOUSE	0.0061	0.14				ATX10_MOUSE	0.33	0.04
AT1A3_MOUSE	0.17	0.05				AT1A3_MOUSE	0.019	0.08				AT1A3_MOUSE	0.36	-0.03
SCAM1_MOUSE	0.32	0.1				SCAM1_MOUSE	0.019	-0.31				SCAM1_MOUSE	0.37	-0.12
SNG3_MOUSE	0.19	0.19				SNG3_MOUSE	0.03	-0.31				SNG3_MOUSE	0.37	-0.14
KCD12_MOUSE	0.33	-0.31				KCD12_MOUSE	0.037	-0.63				KCD12_MOUSE	0.38	-0.34
ANK1_MOUSE	0.66	0.05				ANK1_MOUSE	0.0006	0.29				ANK1_MOUSE	0.39	0.1
S27A4_MOUSE	0.25	0.21				S27A4_MOUSE	0.04	0.6				S27A4_MOUSE	0.39	0.15
PLPP_MOUSE	0.48	0.04				PLPP_MOUSE	0.0036	-0.19				PLPP_MOUSE	0.4	-0.05
BTBDH_MOUSE	0.2	0.32				BTBDH_MOUSE	0.01	0.55				BTBDH_MOUSE	0.4	0.15
VAT1L_MOUSE	0.89	-0.01				VAT1L_MOUSE	0.019	-0.2				VAT1L_MOUSE	0.4	-0.09
ATPK_MOUSE	0.42	0.1				ATPK_MOUSE	0.0062	0.25				ATPK_MOUSE	0.41	0.12
CBR3_MOUSE	0.55	-0.25				CBR3_MOUSE	0.0099	-0.86				CBR3_MOUSE	0.44	-0.25
ATPO_MOUSE	0.97	0				ATPO_MOUSE	0.023	0.12				ATPO_MOUSE	0.45	0.04
RASK_MOUSE	0.36	0.08				RASK_MOUSE	0.041	0.15				RASK_MOUSE	0.45	0.07
SYVC_MOUSE	0.13	0.07				SYVC_MOUSE	0.047	0.11				SYVC_MOUSE	0.45	0.07
PSMD7_MOUSE	0.94	0				PSMD7_MOUSE	0.038	-0.27				PSMD7_MOUSE	0.46	0.08
MECR_MOUSE	0.26	0.12				MECR_MOUSE	0.013	0.2				MECR_MOUSE	0.47	0.09
VP26B_MOUSE	0.18	-0.16				VP26B_MOUSE	0.039	-0.21				VP26B_MOUSE	0.47	-0.08
PRVA_MOUSE	0.6	0.13				PRVA_MOUSE	0.031	0.47				PRVA_MOUSE	0.49	0.18
NDUS3_MOUSE	0.23	0.12				NDUS3_MOUSE	0.017	0.12				NDUS3_MOUSE	0.51	0.03
DIC_MOUSE	0.98	0				DIC_MOUSE	0.036	0.33				DIC_MOUSE	0.51	0.12
WDR47_MOUSE	0.32	-0.15				WDR47_MOUSE	0.011	-0.41				WDR47_MOUSE	0.53	-0.06
PHAR1_MOUSE	0.093	-0.64				PHAR1_MOUSE	0.018	-0.87				PHAR1_MOUSE	0.53	-0.23
KAP1_MOUSE	0.18	0.34				KAP1_MOUSE	0.042	0.45				KAP1_MOUSE	0.53	0.17
RPN2_MOUSE	0.72	0.04				RPN2_MOUSE	0.044	-0.15				RPN2_MOUSE	0.53	-0.06
HNRPD_MOUSE	0.36	0.09				HNRPD_MOUSE	0.0089	0.11				HNRPD_MOUSE	0.55	0.04
CLMN_MOUSE	0.073	0.47				CLMN_MOUSE	0.024	0.55				CLMN_MOUSE	0.55	0.15
DLDH_MOUSE	0.052	0.15				DLDH_MOUSE	0.042	0.14				DLDH_MOUSE	0.55	0.04
RT34_MOUSE	0.13	0.13				RT34_MOUSE	0.0039	0.27				RT34_MOUSE	0.56	0.06
A1AT2_MOUSE	0.53	0.06				A1AT2_MOUSE	0.037	0.21				A1AT2_MOUSE	0.56	0.12
CDD_MOUSE	0.077	0.42				CDD_MOUSE	0.012	0.61				CDD_MOUSE	0.57	0.09
PSD11_MOUSE	0.068	0.11				PSD11_MOUSE	0.022	0.16				PSD11_MOUSE	0.57	-0.02
KINH_MOUSE	0.97	-0.01				KINH_MOUSE	0.01	-0.24				KINH_MOUSE	0.59	-0.04
K1C10_MOUSE	0.59	0.11				K1C10_MOUSE	0.0015	0.96				K1C10_MOUSE	0.6	-0.16
TSN_MOUSE	0.43	0.08				TSN_MOUSE	0.017	0.18				TSN_MOUSE	0.6	0.04
TM1L2_MOUSE	0.91	-0.01				TM1L2_MOUSE	0.00082	0.24				TM1L2_MOUSE	0.61	0.05
NDUB4_MOUSE	0.057	0.11				NDUB4_MOUSE	0.016	0.13				NDUB4_MOUSE	0.61	0.02
GBRB3_MOUSE	0.19	0.39				GBRB3_MOUSE	0.046	0.54				GBRB3_MOUSE	0.62	0.13
AASD1_MOUSE	0.78	0.03				AASD1_MOUSE	0.023	0.25				AASD1_MOUSE	0.63	0.05
ARP3_MOUSE	0.45	-0.05				ARP3_MOUSE	0.03	-0.22				ARP3_MOUSE	0.63	-0.04
K22E_MOUSE	0.35	0.16				K22E_MOUSE	0.04	0.55				K22E_MOUSE	0.64	-0.12
SAHH_MOUSE	0.23	-0.05				SAHH_MOUSE	0.013	-0.1				SAHH_MOUSE	0.65	-0.02
TPD52_MOUSE	0.48	-0.09				TPD52_MOUSE	0.022	-0.31				TPD52_MOUSE	0.65	-0.06
NDUBB_MOUSE	0.38	0.13				NDUBB_MOUSE	0.035	0.22				NDUBB_MOUSE	0.66	0.05
DHX30_MOUSE	0.45	0.12				DHX30_MOUSE	0.03	0.37				DHX30_MOUSE	0.68	0.05
EXOC4_MOUSE	0.6	0.05				EXOC4_MOUSE	0.045	-0.21				EXOC4_MOUSE	0.69	-0.04
ABCF2_MOUSE	0.96	-0.01				ABCF2_MOUSE	0.039	0.45				ABCF2_MOUSE	0.71	0.09
DHX9_MOUSE	0.16	0.11				DHX9_MOUSE	0.045	0.16				DHX9_MOUSE	0.72	0.04
COF2_MOUSE	0.42	0.1				COF2_MOUSE	0.032	0.33				COF2_MOUSE	0.73	-0.07
SRRM2_MOUSE	0.83	0.04				SRRM2_MOUSE	0.023	0.34				SRRM2_MOUSE	0.75	0.03
SCN2B_MOUSE	0.76	0.07				SCN2B_MOUSE	0.048	-0.54				SCN2B_MOUSE	0.77	-0.06
ODPA_MOUSE	0.096	0.09				ODPA_MOUSE	0.0099	0.12				ODPA_MOUSE	0.78	0
TPM1_MOUSE	0.59	-0.05				TPM1_MOUSE	0.0025	-0.32				TPM1_MOUSE	0.79	-0.02
RPGF4_MOUSE	0.96	0.02				RPGF4_MOUSE	0.0029	-0.27				RPGF4_MOUSE	0.79	-0.02
KCRU_MOUSE	0.058	0.13				KCRU_MOUSE	0.017	0.15				KCRU_MOUSE	0.79	0.04
ODO2_MOUSE	0.11	0.13				ODO2_MOUSE	0.034	0.15				ODO2_MOUSE	0.81	0.01
MLC1_MOUSE	0.083	0.25				MLC1_MOUSE	0.043	-0.28				MLC1_MOUSE	0.81	-0.06
HPLN1_MOUSE	0.18	0.21				HPLN1_MOUSE	0.027	0.38				HPLN1_MOUSE	0.84	0.05
ACSL6_MOUSE	0.96	0				ACSL6_MOUSE	0.045	0.07				ACSL6_MOUSE	0.92	-0.01
C1QC_MOUSE	0.2	-0.17				C1QC_MOUSE	0.0039	-0.38				C1QC_MOUSE	0.94	0
THTM_MOUSE	0.083	0.13				THTM_MOUSE	0.027	0.15				THTM_MOUSE	0.94	0.02
AL1B1_MOUSE	0.23	-0.09				AL1B1_MOUSE	0.018	-0.18				AL1B1_MOUSE	0.95	0
MAP2_MOUSE	0.56	0.11				MAP2_MOUSE	0.024	0.32				MAP2_MOUSE	0.96	0.06
CARL2_MOUSE	0.89	0				CARL2_MOUSE	0.42	-0.07				CARL2_MOUSE	0.00014	0.34	Regulated in G-CSF + Cocaine only
CYB5B_MOUSE	0.61	-0.05				CYB5B_MOUSE	0.63	-0.05				CYB5B_MOUSE	0.00014	0.25
VDAC3_MOUSE	0.62	-0.05				VDAC3_MOUSE	0.12	-0.09				VDAC3_MOUSE	0.00035	-0.18
HDAC2_MOUSE	0.074	0.42				HDAC2_MOUSE	0.7	-0.09				HDAC2_MOUSE	0.00047	0.87
STMN1_MOUSE	0.75	-0.02				STMN1_MOUSE	0.89	0				STMN1_MOUSE	0.0011	0.16
SFXN3_MOUSE	0.35	-0.07				SFXN3_MOUSE	0.48	-0.06				SFXN3_MOUSE	0.002	-0.19
GBB2_MOUSE	0.82	0.01				GBB2_MOUSE	0.12	-0.19				GBB2_MOUSE	0.0026	-0.42
AP2M1_MOUSE	0.81	0.01				AP2M1_MOUSE	0.11	-0.08				AP2M1_MOUSE	0.0028	-0.15
AATM_MOUSE	0.14	0.06				AATM_MOUSE	0.6	0.02				AATM_MOUSE	0.0028	-0.11
TMX3_MOUSE	0.83	0.04				TMX3_MOUSE	0.47	0.1				TMX3_MOUSE	0.0032	0.41
MAP1B_MOUSE	0.87	-0.01				MAP1B_MOUSE	0.088	0.05				MAP1B_MOUSE	0.0034	0.08
GBB1_MOUSE	0.32	-0.09				GBB1_MOUSE	0.12	-0.17				GBB1_MOUSE	0.0034	-0.35
WDR7_MOUSE	0.34	-0.03				WDR7_MOUSE	0.15	-0.08				WDR7_MOUSE	0.0035	-0.14
ENOG_MOUSE	0.077	-0.07				ENOG_MOUSE	0.065	-0.07				ENOG_MOUSE	0.0037	-0.12
HS71A_MOUSE (+1)	0.069	0.18				HS71A_MOUSE (+1)	0.43	0.07				HS71A_MOUSE (+1)	0.0043	0.26
VDAC1_MOUSE	0.58	-0.02				VDAC1_MOUSE	0.056	-0.08				VDAC1_MOUSE	0.0046	-0.13
CLCB_MOUSE	0.98	0				CLCB_MOUSE	0.063	0.19				CLCB_MOUSE	0.0048	0.32
PFKAM_MOUSE	0.84	0				PFKAM_MOUSE	0.051	-0.07				PFKAM_MOUSE	0.005	-0.12
DDX6_MOUSE	0.18	0.13				DDX6_MOUSE	0.095	0.17				DDX6_MOUSE	0.0063	0.18
AN13D_MOUSE	0.1	0.23				AN13D_MOUSE	0.14	0.13				AN13D_MOUSE	0.0065	0.27
FN3K_MOUSE	0.47	-0.07				FN3K_MOUSE	0.4	0.06				FN3K_MOUSE	0.007	0.21
1433T_MOUSE	0.77	0.02				1433T_MOUSE	0.14	-0.09				1433T_MOUSE	0.0071	-0.22
ANXA5_MOUSE	0.25	0.07				ANXA5_MOUSE	0.54	0.07				ANXA5_MOUSE	0.0074	0.21
VWA8_MOUSE	0.057	0.19				VWA8_MOUSE	0.21	0.12				VWA8_MOUSE	0.0078	0.2
ACSL3_MOUSE	0.98	0				ACSL3_MOUSE	0.53	-0.1				ACSL3_MOUSE	0.0082	-0.51
H14_MOUSE	0.17	0.13				H14_MOUSE	0.3	0.1				H14_MOUSE	0.0087	0.28
RGPA1_MOUSE	0.21	0.25				RGPA1_MOUSE	0.58	0.11				RGPA1_MOUSE	0.0089	0.51
COQ9_MOUSE	0.12	0.27				COQ9_MOUSE	0.22	0.26				COQ9_MOUSE	0.0094	0.41
NRX3A_MOUSE	0.65	-0.04				NRX3A_MOUSE	0.24	-0.12				NRX3A_MOUSE	0.0096	-0.21
TBCD_MOUSE	0.083	0.23				TBCD_MOUSE	0.063	0.17				TBCD_MOUSE	0.01	0.19
PP1B_MOUSE	0.25	-0.28				PP1B_MOUSE	0.087	-0.56				PP1B_MOUSE	0.011	-1.08
ESTD_MOUSE	0.27	-0.1				ESTD_MOUSE	0.092	-0.22				ESTD_MOUSE	0.012	-0.23
COX5A_MOUSE	0.23	-0.19				COX5A_MOUSE	0.49	-0.15				COX5A_MOUSE	0.012	0.39
H15_MOUSE	0.29	0.09				H15_MOUSE	0.064	0.19				H15_MOUSE	0.013	0.24
6PGL_MOUSE	0.68	0.04				6PGL_MOUSE	0.079	-0.14				6PGL_MOUSE	0.013	-0.17
GPC5B_MOUSE	0.052	0.26				GPC5B_MOUSE	0.11	0.22				GPC5B_MOUSE	0.013	0.32
SNP25_MOUSE	0.82	0.01				SNP25_MOUSE	0.38	0.06				SNP25_MOUSE	0.013	-0.22
PCNP_MOUSE	0.13	0.12				PCNP_MOUSE	0.43	0.06				PCNP_MOUSE	0.013	0.21
RGRF1_MOUSE	0.063	0.22				RGRF1_MOUSE	0.058	0.23				RGRF1_MOUSE	0.014	0.18
VAT1_MOUSE	0.078	0.17				VAT1_MOUSE	0.35	0.1				VAT1_MOUSE	0.014	0.18
ERF1_MOUSE	0.25	-0.09				ERF1_MOUSE	0.39	-0.06				ERF1_MOUSE	0.014	-0.23
SH3K1_MOUSE	0.5	0.06				SH3K1_MOUSE	0.086	0.18				SH3K1_MOUSE	0.015	0.21
GBRB2_MOUSE	0.56	-0.07				GBRB2_MOUSE	0.36	-0.12				GBRB2_MOUSE	0.015	-0.27
SASH1_MOUSE	0.14	0.2				SASH1_MOUSE	0.87	-0.02				SASH1_MOUSE	0.015	0.23
THTR_MOUSE	0.5	-0.06				THTR_MOUSE	0.13	0.09				THTR_MOUSE	0.016	0.15
ADK_MOUSE	0.72	-0.06				ADK_MOUSE	0.12	-0.16				ADK_MOUSE	0.017	-0.25
FA49B_MOUSE	0.18	-0.08				FA49B_MOUSE	0.18	-0.08				FA49B_MOUSE	0.019	-0.15
MESD_MOUSE	0.16	0.34				MESD_MOUSE	0.8	0.05				MESD_MOUSE	0.02	0.43
NHRF2_MOUSE	0.066	0.2				NHRF2_MOUSE	0.27	0.12				NHRF2_MOUSE	0.021	0.21
EHD4_MOUSE	0.099	0.19				EHD4_MOUSE	0.75	0.05				EHD4_MOUSE	0.021	0.11
PTMA_MOUSE	0.32	0.13				PTMA_MOUSE	0.085	0.3				PTMA_MOUSE	0.022	0.36
SYHC_MOUSE	0.075	0.13				SYHC_MOUSE	0.089	0.13				SYHC_MOUSE	0.022	0.15
GALE_MOUSE	0.15	0.19				GALE_MOUSE	0.29	0.11				GALE_MOUSE	0.022	0.16
RAB2A_MOUSE	0.24	0.07				RAB2A_MOUSE	0.87	0.02				RAB2A_MOUSE	0.022	-0.13
ACBG1_MOUSE	0.69	-0.01				ACBG1_MOUSE	0.15	-0.06				ACBG1_MOUSE	0.024	-0.1
CACP_MOUSE	0.18	0.16				CACP_MOUSE	0.8	0.08				CACP_MOUSE	0.024	0.46
UGPA_MOUSE	0.44	-0.07				UGPA_MOUSE	0.13	-0.14				UGPA_MOUSE	0.025	-0.2
TRFE_MOUSE	0.072	0.09				TRFE_MOUSE	0.19	0.09				TRFE_MOUSE	0.025	0.13
ARL8B_MOUSE	0.96	-0.01				ARL8B_MOUSE	0.43	0.05				ARL8B_MOUSE	0.025	0.12
SYDC_MOUSE	0.81	0.02				SYDC_MOUSE	0.94	0.01				SYDC_MOUSE	0.025	0.15
VDAC2_MOUSE	0.89	0.01				VDAC2_MOUSE	0.25	-0.06				VDAC2_MOUSE	0.026	-0.13
WIPI2_MOUSE	0.65	0.07				WIPI2_MOUSE	0.58	-0.01				WIPI2_MOUSE	0.026	-0.31
TMM11_MOUSE	0.57	-0.04				TMM11_MOUSE	0.23	-0.1				TMM11_MOUSE	0.027	-0.14
PSMD6_MOUSE	0.28	0.06				PSMD6_MOUSE	0.054	0.08				PSMD6_MOUSE	0.028	0.11
PSDE_MOUSE	0.8	-0.01				PSDE_MOUSE	0.82	-0.01				PSDE_MOUSE	0.028	-0.19
ENPL_MOUSE	0.11	0.11				ENPL_MOUSE	0.068	0.13				ENPL_MOUSE	0.029	0.16
HPLN2_MOUSE	0.84	-0.06				HPLN2_MOUSE	0.47	0.06				HPLN2_MOUSE	0.029	0.16
GSTP1_MOUSE	0.54	-0.05				GSTP1_MOUSE	0.8	-0.02				GSTP1_MOUSE	0.03	0.14
HS12B_MOUSE	0.29	0.3				HS12B_MOUSE	0.16	0.34				HS12B_MOUSE	0.031	0.46
UBC12_MOUSE	0.86	0				UBC12_MOUSE	0.54	-0.05				UBC12_MOUSE	0.031	-0.16
S27A1_MOUSE	0.15	0.16				S27A1_MOUSE	0.12	0.14				S27A1_MOUSE	0.033	0.2
SNAB_MOUSE	0.11	0.07				SNAB_MOUSE	0.58	0.02				SNAB_MOUSE	0.033	-0.14
GELS_MOUSE	0.14	-0.14				GELS_MOUSE	0.17	0.09				GELS_MOUSE	0.034	0.12
SSBP_MOUSE	0.34	0.1				SSBP_MOUSE	0.95	-0.01				SSBP_MOUSE	0.034	-0.27
MPCP_MOUSE	0.053	0.1				MPCP_MOUSE	0.63	-0.02				MPCP_MOUSE	0.035	-0.11
ARP3B_MOUSE	0.53	-0.08				ARP3B_MOUSE	0.1	-0.67				ARP3B_MOUSE	0.037	-0.41
KIF5C_MOUSE	0.19	-0.15				KIF5C_MOUSE	0.059	-0.24				KIF5C_MOUSE	0.038	-0.27
RS6_MOUSE	0.28	0.1				RS6_MOUSE	0.17	0.09				RS6_MOUSE	0.038	0.12
ADDB_MOUSE	0.34	-0.05				ADDB_MOUSE	0.29	-0.07				ADDB_MOUSE	0.038	-0.14
SP16H_MOUSE	0.97	-0.01				SP16H_MOUSE	0.37	-0.25				SP16H_MOUSE	0.038	-0.37
SYT2_MOUSE	0.45	0.05				SYT2_MOUSE	0.9	0				SYT2_MOUSE	0.038	-0.16
GNB5_MOUSE	0.97	-0.02				GNB5_MOUSE	0.13	-0.14				GNB5_MOUSE	0.04	-0.24
CBPM_MOUSE	0.69	-0.1				CBPM_MOUSE	0.33	0.16				CBPM_MOUSE	0.041	0.26
NPTN_MOUSE	0.46	0.07				NPTN_MOUSE	0.4	-0.06				NPTN_MOUSE	0.041	-0.16
C170B_MOUSE	0.14	0.15				C170B_MOUSE	0.61	0.05				C170B_MOUSE	0.043	0.31
MOCS3_MOUSE	0.45	0.09				MOCS3_MOUSE	0.08	0.28				MOCS3_MOUSE	0.044	0.25
SV2A_MOUSE	0.059	0.13				SV2A_MOUSE	0.38	-0.04				SV2A_MOUSE	0.044	-0.13
GDIB_MOUSE	0.47	-0.04				GDIB_MOUSE	0.074	-0.1				GDIB_MOUSE	0.045	-0.11
PZP_MOUSE	0.22	0.08				PZP_MOUSE	0.088	0.11				PZP_MOUSE	0.046	0.23
ACY2_MOUSE	0.063	-0.26				ACY2_MOUSE	0.14	0.15				ACY2_MOUSE	0.046	0.15
RS20_MOUSE	0.25	0.11				RS20_MOUSE	0.15	0.14				RS20_MOUSE	0.047	0.23
AP1M1_MOUSE	0.49	-0.13				AP1M1_MOUSE	0.27	-0.24				AP1M1_MOUSE	0.047	-0.42
CKAP5_MOUSE	0.32	-0.06				CKAP5_MOUSE	0.33	-0.06				CKAP5_MOUSE	0.047	-0.11
RASA3_MOUSE	0.26	0.13				RASA3_MOUSE	0.066	0.2				RASA3_MOUSE	0.048	0.2
CAN5_MOUSE	0.54	0.07				CAN5_MOUSE	0.14	0.18				CAN5_MOUSE	0.049	0.23
ZNT9_MOUSE	0.05	0.13				ZNT9_MOUSE	0.2	0.12				ZNT9_MOUSE	0.049	0.15
NECP1_MOUSE	0.77	0.03				NECP1_MOUSE	0.87	-0.01				NECP1_MOUSE	0.049	-0.18

## Sheet: S6 Canonical Signaling Pathways
		-log(p-value)	z-score	Molecules
Opioid Signaling Pathway	GCSF v Sal	6.77	-0.816	MAP2K6,NOS1,CAMK4,Calm1 (includes others),CAMK1,CAMK1D,AP1B1,SLC12A5,TH,CAMK2D,ADCY5,PPP3R1,SOS1,PLCB1,CTNNB1,PPP3CA,CAMK2B,CLTC,RRAS2,PRKAR2B,GNAO1,PDE1B,CACNA2D1,PRKCB,CAMK2G
	Coc v Sal	5.89	-1.964	MAP2K6,MAP2K4,Calm1 (includes others),CAMK4,CAMK1D,KRAS,SLC12A5,PRKCG,TH,CAMK2A,ADCY5,PPP3R1,PDE1B,SOS1,PRKAR1B,PLCB1,CACNA2D3,MAP2K1,PPP3CA,PRKCB,CAMK2G,CAMK2B
	GC v Sal	4.3	-2.84	MAP2K6,MAP2K4,AP2M1,CLTB,SLC12A5,GNB1,TH,RRAS2,ADCY5,PPP3R1,GNAO1,PDE1B,PLCB1,PPP3CA,PRKCB,CAMK2B
Protein Kinase A Signaling	GCSF v Sal	6.62	-1.347	ENPP6,FLNB,CAMK4,Calm1 (includes others),YWHAH,PDIA3,PTPN5,TH,CAMK2D,PPP1R7,FLNA,ADCY5,PPP3R1,PTPRZ1,PLCB1,GNA13,CTNNB1,APEX1,PPP3CA,CAMK2B,PDE2A,PDE10A,PPP1R1B,YWHAZ,PRKAR2B,PYGM,PDE1B,PTPRA,CAMK2G,PRKCB
	Coc v Sal	6.58	-2.2	AKAP12,FLNB,CAMK4,Calm1 (includes others),PDIA3,PTPN5,TH,CAMK2A,PPP1R7,FLNA,ADCY5,PPP3R1,PRKAR1B,PLCB1,APEX1,MAP2K1,PPP3CA,CAMK2B,PDE2A,YWHAB,PPP1R1B,PDE10A,YWHAZ,PRKCG,PDE1B,PTPRA,PRKCB,CAMK2G
	GC v Sal	6.83	-1.789	FLNB,PDE2A,ADD2,YWHAB,PPP1R1B,PDE10A,YWHAZ,GNB5,PPP1CB,PTPN5,YWHAQ,GNB1,TH,FLNA,ADCY5,PPP1R7,PPP3R1,PDE1B,GNB2,PLCB1,APEX1,PPP3CA,PRKCB,CAMK2B
NFAT Signaling	GCSF v Sal	5.21	-0.447	MAP2K6,CAMK1,Calm1 (includes others),CAMK4,CAMK1D,PDIA3,GRB2,SLC8A2,RRAS2,PRKAR2B,CAMK2D,ADCY5,PPP3R1,CACNA2D1,SOS1,MAPK10,PLCB1,PPP3CA,PRKCB,CAMK2G,CAMK2B
	Coc v Sal	5.98	-1.789	MAP2K6,MAP2K4,CAMK4,Calm1 (includes others),CAMK1D,PDIA3,GRB2,KRAS,PRKCG,CAMK2A,ADCY5,PPP3R1,SOS1,PRKAR1B,PLCB1,CACNA2D3,MAP2K1,PPP3CA,PRKCB,CAMK2G,CAMK2B
	GC v Sal	3.65	-2.111	MAP2K6,MAP2K4,HDAC2,GNB5,GNB1,RRAS2,ADCY5,PPP3R1,MAPK10,GNB2,PLCB1,PPP3CA,PRKCB,CAMK2B
EIF2 Signaling	GCSF v Sal	5.19	2.111	PABPC1,RPS19,EIF3H,RPL3,GRB2,RPLP2,HSPA5,RPL7A,RPL28,RPS4Y1,RRAS2,RPS16,RPL13,RPS26,SOS1,EIF3A,RPL6,RPS2,RPL31
	Coc v Sal	3.6	1.667	RPS19,EIF3H,GRB2,EIF5B,RPS10,KRAS,RPL26,RPL7A,HSPA5,RPS26,SOS1,EIF3A,RPS2,RPL31,MAP2K1
	GC v Sal	2.23	-0.447	RPS19,RRAS2,RPS20,EIF3H,RPS26,RPLP2,RPS10,PPP1CB,HSPA5,RPL7A
Tryptophan Degradation X (Mammalian, via Tryptamine)	GCSF v Sal	4.93	0.816	ALDH4A1,ALDH2,AKR1A1,ALDH1L1,ALDH1A1,DDC
	Coc v Sal	0.393	0	AKR1A1
	GC v Sal	3.35	0	ALDH2,AKR1A1,ALDH1A1,DDC
Chemokine Signaling	GCSF v Sal	4.48	-1.265	CAMK4,CAMK2D,CAMK1,RRAS2,Calm1 (includes others),CAMK1D,PLCB1,PRKCB,CAMK2G,CAMK2B
	Coc v Sal	4.89	-1.897	CAMK2A,CAMK4,Calm1 (includes others),CAMK1D,PLCB1,KRAS,MAP2K1,PRKCB,CAMK2G,CAMK2B
	GC v Sal	1.93	-1.342	RRAS2,PPP1CB,PLCB1,PRKCB,CAMK2B
Synaptic Long Term Potentiation	GCSF v Sal	4.1	-0.577	CAMK4,Calm1 (includes others),PDIA3,RRAS2,PRKAR2B,CAMK2D,PPP1R7,PPP3R1,PLCB1,PPP3CA,CAMK2B,CAMK2G,PRKCB
	Coc v Sal	6.01	-1.069	CAMK4,Calm1 (includes others),PDIA3,KRAS,PRKCG,CAMK2A,PPP1R7,PPP3R1,PRKAR1B,PLCB1,MAP2K1,PPP3CA,CAMK2B,CAMK2G,PRKCB
	GC v Sal	2.49	-1.414	RRAS2,PPP1R7,PPP3R1,PPP1CB,PLCB1,PPP3CA,PRKCB,CAMK2B
CREB Signaling in Neurons	GCSF v Sal	3.37	-0.577	CAMK4,Calm1 (includes others),PDIA3,GRB2,GNAZ,RRAS2,PRKAR2B,CAMK2D,ADCY5,CACNA2D1,GNAO1,SOS1,PLCB1,GNA13,PRKCB,CAMK2G,CAMK2B
	Coc v Sal	3.44	-1.069	CAMK4,Calm1 (includes others),PDIA3,GRB2,KRAS,PRKCG,CAMK2A,ADCY5,SOS1,PRKAR1B,PLCB1,MAP2K1,CACNA2D3,PRKCB,CAMK2B,CAMK2G
	GC v Sal	1.44	-2.236	GNB1,RRAS2,ADCY5,GNAO1,GNB2,GNB5,PLCB1,PRKCB,CAMK2B
GM-CSF Signaling	GCSF v Sal	3.28	0.378	CAMK2D,RRAS2,GRB2,PPP3R1,SOS1,PPP3CA,PRKCB,CAMK2G,CAMK2B
	Coc v Sal	4.38	0	CAMK2A,GRB2,PPP3R1,SOS1,KRAS,MAP2K1,PPP3CA,PRKCB,CAMK2G,CAMK2B
	GC v Sal	1.7	0	RRAS2,PPP3R1,PPP3CA,PRKCB,CAMK2B

## Sheet: S7 GO Mol Function
G-CSF vs Saline										Coc vs Saline										G-CSF+Coc vs Saline
GO molecular function complete	Mus musculus - REFLIST (22262)	upload_1 (344)	upload_1 (expected)	upload_1 (over/under)	upload_1 (fold Enrichment)	upload_1 (raw P-value)	upload_1 (FDR)			GO molecular function complete	Mus musculus - REFLIST (22262)	upload_1 (241)	upload_1 (expected)	upload_1 (over/under)	upload_1 (fold Enrichment)	upload_1 (raw P-value)	upload_1 (FDR)			GO molecular function complete	Mus musculus - REFLIST (22262)	upload_1 (186)	upload_1 (expected)	upload_1 (over/under)	upload_1 (fold Enrichment)	upload_1 (raw P-value)	upload_1 (FDR)
binding (GO:0005488)	13001	296	200.9	+	1.47	2.49e-28	1.13e-24			protein binding (GO:0005515)	8900	170	96.35	+	1.76	2.4e-21	1.09e-17			binding (GO:0005488)	13001	167	108.62	+	1.54	7.88e-21	3.57e-17
RNA binding (GO:0003723)	1019	73	15.75	+	4.64	2.86e-27	6.48e-24			binding (GO:0005488)	13001	206	140.74	+	1.46	2.12e-19	4.82e-16			protein binding (GO:0005515)	8900	137	74.36	+	1.84	2.67e-20	6.06e-17
protein binding (GO:0005515)	8900	227	137.53	+	1.65	6.02e-22	9.09e-19			structural molecule activity (GO:0005198)	613	32	6.64	+	4.82	5.44e-13	8.23e-10			identical protein binding (GO:0042802)	1840	46	15.37	+	2.99	1.67e-11	2.52e-08
heterocyclic compound binding (GO:1901363)	4917	152	75.98	+	2	1.82e-19	2.07e-16			RNA binding (GO:0003723)	1019	41	11.03	+	3.72	7.98e-13	9.05e-10			cytoskeletal protein binding (GO:0008092)	936	31	7.82	+	3.96	9.34e-11	1.06e-07
organic cyclic compound binding (GO:0097159)	5006	152	77.35	+	1.96	1.08e-18	9.77e-16			organic cyclic compound binding (GO:0097159)	5006	100	54.19	+	1.85	6.2e-11	5.62e-08			RNA binding (GO:0003723)	1019	32	8.51	+	3.76	1.65e-10	1.5e-07
mRNA binding (GO:0003729)	243	28	3.75	+	7.46	1.56e-15	1.18e-12			heterocyclic compound binding (GO:1901363)	4917	98	53.23	+	1.84	1.34e-10	1.02e-07			structural molecule activity (GO:0005198)	613	24	5.12	+	4.69	6.58e-10	4.97e-07
protein-containing complex binding (GO:0044877)	1163	58	17.97	+	3.23	9.27e-15	6.01e-12			molecular transducer activity (GO:0060089)	2324	1	25.16	-	0.04	1.66e-10	1.07e-07			actin binding (GO:0003779)	411	19	3.43	+	5.53	3.48e-09	2.25e-06
enzyme binding (GO:0019899)	2260	84	34.92	+	2.41	7.23e-14	4.1e-11			identical protein binding (GO:0042802)	1840	52	19.92	+	2.61	1.98e-10	1.12e-07			molecular transducer activity (GO:0060089)	2324	1	19.42	-	0.05	7.39e-08	3.72e-05
signaling receptor activity (GO:0038023)	2271	2	35.09	-	0.06	1.56e-13	7.87e-11			cytoskeletal protein binding (GO:0008092)	936	35	10.13	+	3.45	3.12e-10	1.57e-07			heterocyclic compound binding (GO:1901363)	4917	74	41.08	+	1.8	6.61e-08	3.75e-05
structural molecule activity (GO:0005198)	613	39	9.47	+	4.12	3.37e-13	1.53e-10			signaling receptor activity (GO:0038023)	2271	1	24.58	-	0.04	4.19e-10	1.9e-07			signaling receptor activity (GO:0038023)	2271	1	18.97	-	0.05	1.12e-07	5.07e-05
molecular transducer activity (GO:0060089)	2324	3	35.91	-	0.08	1.18e-12	4.88e-10			mRNA binding (GO:0003729)	243	18	2.63	+	6.84	4.91e-10	2.02e-07			organic cyclic compound binding (GO:0097159)	5006	74	41.83	+	1.77	1.38e-07	5.68e-05
transmembrane signaling receptor activity (GO:0004888)	2082	2	32.17	-	0.06	3.02e-12	1.14e-09			actin binding (GO:0003779)	411	22	4.45	+	4.94	1.85e-09	7e-07			enzyme binding (GO:0019899)	2260	43	18.88	+	2.28	2.95e-07	0.000111
identical protein binding (GO:0042802)	1840	70	28.43	+	2.46	5.27e-12	1.84e-09			transmembrane signaling receptor activity (GO:0004888)	2082	1	22.54	-	0.04	3.54e-09	1.24e-06			transmembrane signaling receptor activity (GO:0004888)	2082	1	17.4	-	0.06	6.19e-07	0.0002
protein domain specific binding (GO:0019904)	781	42	12.07	+	3.48	7.13e-12	2.31e-09			protein-containing complex binding (GO:0044877)	1163	37	12.59	+	2.94	6.53e-09	2.12e-06			protein-containing complex binding (GO:0044877)	1163	28	9.72	+	2.88	5.99e-07	0.000209
cytoskeletal protein binding (GO:0008092)	936	45	14.46	+	3.11	4.2e-11	1.27e-08			enzyme binding (GO:0019899)	2260	55	24.47	+	2.25	1.2e-08	3.64e-06			protein kinase binding (GO:0019901)	713	21	5.96	+	3.53	8.38e-07	0.000253
nucleic acid binding (GO:0003676)	3021	91	46.68	+	1.95	3.8e-10	1.08e-07			ligase activity (GO:0016874)	148	13	1.6	+	8.11	2.07e-08	5.88e-06			actin filament binding (GO:0051015)	189	11	1.58	+	6.97	9.38e-07	0.000266
nucleoside phosphate binding (GO:1901265)	2003	68	30.95	+	2.2	1.17e-09	2.95e-07			actin filament binding (GO:0051015)	189	14	2.05	+	6.84	4.37e-08	1.17e-05			protein domain specific binding (GO:0019904)	781	21	6.53	+	3.22	3.39e-06	0.000905
nucleotide binding (GO:0000166)	2003	68	30.95	+	2.2	1.17e-09	3.12e-07			small molecule binding (GO:0036094)	2366	55	25.61	+	2.15	5.36e-08	1.35e-05			protein dimerization activity (GO:0046983)	1367	29	11.42	+	2.54	4.36e-06	0.00104
anion binding (GO:0043168)	2616	80	40.42	+	1.98	3.79e-09	9.04e-07			nucleoside phosphate binding (GO:1901265)	2003	49	21.68	+	2.26	9.76e-08	2.21e-05			kinase binding (GO:0019900)	793	21	6.63	+	3.17	4.27e-06	0.00108
small molecule binding (GO:0036094)	2366	74	36.56	+	2.02	6.49e-09	1.47e-06			nucleotide binding (GO:0000166)	2003	49	21.68	+	2.26	9.76e-08	2.33e-05			low-density lipoprotein particle receptor binding (GO:0050750)	26	5	0.22	+	23.02	5.28e-06	0.0012
actin binding (GO:0003779)	411	25	6.35	+	3.94	1.65e-08	3.56e-06			protein domain specific binding (GO:0019904)	781	26	8.45	+	3.08	6.26e-07	0.000135			molecular_function (GO:0003674)	20234	184	169.06	+	1.09	7.71e-06	0.00159
olfactory receptor activity (GO:0004984)	1107	0	17.11	-	< 0.01	4.52e-08	9.33e-06			structural constituent of cytoskeleton (GO:0005200)	64	8	0.69	+	11.55	1.02e-06	0.000211			Unclassified (UNCLASSIFIED)	2028	2	16.94	-	0.12	7.71e-06	0.00167
protein C-terminus binding (GO:0008022)	231	18	3.57	+	5.04	5.75e-08	1.13e-05			carbohydrate derivative binding (GO:0097367)	2062	47	22.32	+	2.11	1.14e-06	0.000224			lipoprotein particle receptor binding (GO:0070325)	30	5	0.25	+	19.95	9.82e-06	0.00194
mRNA 3'-UTR binding (GO:0003730)	75	11	1.16	+	9.49	7.64e-08	1.44e-05			catalytic activity (GO:0003824)	5686	96	61.55	+	1.56	1.67e-06	0.000303			structural constituent of ribosome (GO:0003735)	165	9	1.38	+	6.53	1.53e-05	0.00289
double-stranded RNA binding (GO:0003725)	84	11	1.3	+	8.47	2.16e-07	3.92e-05			anion binding (GO:0043168)	2616	55	28.32	+	1.94	1.67e-06	0.000315			chromatin DNA binding (GO:0031490)	94	7	0.79	+	8.91	2.14e-05	0.00388
ribonucleotide binding (GO:0032553)	1778	57	27.47	+	2.07	2.3e-07	4.01e-05			protein dimerization activity (GO:0046983)	1367	35	14.8	+	2.37	2.79e-06	0.000487			glutamate receptor binding (GO:0035254)	65	6	0.54	+	11.05	2.73e-05	0.00477
purine ribonucleotide binding (GO:0032555)	1763	56	27.24	+	2.06	3.77e-07	6.34e-05			molecular_function (GO:0003674)	20234	237	219.05	+	1.08	3.93e-06	0.000637			anion binding (GO:0043168)	2616	42	21.86	+	1.92	3.15e-05	0.00529
structural constituent of ribosome (GO:0003735)	165	14	2.55	+	5.49	6.75e-07	9.57e-05			Unclassified (UNCLASSIFIED)	2028	4	21.95	-	0.18	3.93e-06	0.000661			ionotropic glutamate receptor binding (GO:0035255)	42	5	0.35	+	14.25	4.28e-05	0.00694
actin filament binding (GO:0051015)	189	15	2.92	+	5.14	5.96e-07	9.65e-05			double-stranded RNA binding (GO:0003725)	84	8	0.91	+	8.8	6.61e-06	0.00103			clathrin heavy chain binding (GO:0032050)	7	3	0.06	+	51.29	6.44e-05	0.0101
single-stranded RNA binding (GO:0003727)	95	11	1.47	+	7.49	6.62e-07	9.69e-05			ribonucleotide binding (GO:0032553)	1778	41	19.25	+	2.13	6.78e-06	0.00103			nucleic acid binding (GO:0003676)	3021	45	25.24	+	1.78	9.62e-05	0.0145
purine ribonucleoside triphosphate binding (GO:0035639)	1691	54	26.13	+	2.07	6.2e-07	9.7e-05			olfactory receptor activity (GO:0004984)	1107	0	11.98	-	< 0.01	7.87e-06	0.00115			olfactory receptor activity (GO:0004984)	1107	0	9.25	-	< 0.01	0.000126	0.0185
purine nucleotide binding (GO:0017076)	1775	56	27.43	+	2.04	6.59e-07	9.96e-05			purine ribonucleotide binding (GO:0032555)	1763	40	19.09	+	2.1	1.13e-05	0.00159			small molecule binding (GO:0036094)	2366	37	19.77	+	1.87	0.000185	0.0263
ligase activity (GO:0016874)	148	13	2.29	+	5.68	1.18e-06	0.000162			ionotropic glutamate receptor binding (GO:0035255)	42	6	0.45	+	13.2	1.19e-05	0.00164			structural constituent of cytoskeleton (GO:0005200)	64	5	0.53	+	9.35	0.000271	0.0351
carbohydrate derivative binding (GO:0097367)	2062	60	31.86	+	1.88	2.41e-06	0.000322			purine nucleotide binding (GO:0017076)	1775	40	19.22	+	2.08	1.23e-05	0.00164			ion binding (GO:0043167)	5358	67	44.77	+	1.5	0.000279	0.0352
clathrin binding (GO:0030276)	52	8	0.8	+	9.96	3.41e-06	0.000441			protein kinase binding (GO:0019901)	713	22	7.72	+	2.85	1.51e-05	0.00196			protein homodimerization activity (GO:0042803)	908	19	7.59	+	2.5	0.000265	0.0353
kinase binding (GO:0019900)	793	31	12.25	+	2.53	3.82e-06	0.000481			SH3 domain binding (GO:0017124)	128	9	1.39	+	6.5	1.74e-05	0.00219			mRNA binding (GO:0003729)	243	9	2.03	+	4.43	0.000264	0.0363
adenyl ribonucleotide binding (GO:0032559)	1439	46	22.24	+	2.07	4.56e-06	0.00056			drug binding (GO:0008144)	1623	37	17.57	+	2.11	1.9e-05	0.00233			regulatory RNA binding (GO:0061980)	35	4	0.29	+	13.68	0.000299	0.0367
adenyl nucleotide binding (GO:0030554)	1450	46	22.41	+	2.05	5.18e-06	0.000618			structural constituent of ribosome (GO:0003735)	165	10	1.79	+	5.6	2.01e-05	0.0024			ligase activity (GO:0016874)	148	7	1.24	+	5.66	0.000318	0.0379
ATP binding (GO:0005524)	1377	44	21.28	+	2.07	8.42e-06	0.000979			purine ribonucleoside triphosphate binding (GO:0035639)	1691	38	18.31	+	2.08	2.4e-05	0.00279			oxidoreductase activity (GO:0016491)	781	17	6.53	+	2.61	0.000363	0.0422
ionotropic glutamate receptor binding (GO:0035255)	42	7	0.65	+	10.79	8.82e-06	0.001			kinase binding (GO:0019900)	793	23	8.58	+	2.68	2.49e-05	0.00282			nucleoside phosphate binding (GO:1901265)	2003	32	16.74	+	1.91	0.00043	0.0476
Unclassified (UNCLASSIFIED)	2028	10	31.34	-	0.32	9.94e-06	0.001			mRNA 3'-UTR binding (GO:0003730)	75	7	0.81	+	8.62	2.84e-05	0.00293			nucleotide binding (GO:0000166)	2003	32	16.74	+	1.91	0.00043	0.0488
drug binding (GO:0008144)	1623	49	25.08	+	1.95	9.62e-06	0.00102			pyrophosphatase activity (GO:0016462)	853	24	9.23	+	2.6	2.65e-05	0.00293
molecular_function (GO:0003674)	20234	334	312.66	+	1.07	9.94e-06	0.00102			hydrolase activity, acting on acid anhydrides (GO:0016817)	856	24	9.27	+	2.59	2.8e-05	0.00295
SH3 domain binding (GO:0017124)	128	11	1.98	+	5.56	9.53e-06	0.00103			hydrolase activity, acting on acid anhydrides, in phosphorus-containing anhydrides (GO:0016818)	856	24	9.27	+	2.59	2.8e-05	0.00302
calmodulin binding (GO:0005516)	181	13	2.8	+	4.65	9.28e-06	0.00103			lyase activity (GO:0016829)	179	10	1.94	+	5.16	3.89e-05	0.00392
ion channel binding (GO:0044325)	132	11	2.04	+	5.39	1.25e-05	0.00123			proton-transporting ATP synthase activity, rotational mechanism (GO:0046933)	15	4	0.16	+	24.63	4.38e-05	0.00432
protein dimerization activity (GO:0046983)	1367	43	21.12	+	2.04	1.4e-05	0.00135			oxidoreductase activity (GO:0016491)	781	22	8.45	+	2.6	5.71e-05	0.00551
ion binding (GO:0043167)	5358	119	82.79	+	1.44	1.46e-05	0.00138			adenyl ribonucleotide binding (GO:0032559)	1439	33	15.58	+	2.12	5.86e-05	0.00554
rRNA binding (GO:0019843)	71	8	1.1	+	7.29	2.7e-05	0.0025			ATPase coupled ion transmembrane transporter activity (GO:0042625)	59	6	0.64	+	9.39	6.91e-05	0.0058
nitric-oxide synthase binding (GO:0050998)	20	5	0.31	+	16.18	3.28e-05	0.00297			cation-transporting ATPase activity (GO:0019829)	59	6	0.64	+	9.39	6.91e-05	0.00591
catalytic activity (GO:0003824)	5686	123	87.86	+	1.4	3.73e-05	0.00331			regulatory RNA binding (GO:0061980)	35	5	0.38	+	13.2	6.55e-05	0.00594
protein kinase binding (GO:0019901)	713	26	11.02	+	2.36	8.18e-05	0.00714			adenyl nucleotide binding (GO:0030554)	1450	33	15.7	+	2.1	6.45e-05	0.00597
L-glutamate transmembrane transporter activity (GO:0005313)	13	4	0.2	+	19.91	0.000107	0.00918			ATPase activity (GO:0016887)	415	15	4.49	+	3.34	6.74e-05	0.00599
glutamate receptor binding (GO:0035254)	65	7	1	+	6.97	0.000112	0.00942			active ion transmembrane transporter activity (GO:0022853)	59	6	0.64	+	9.39	6.91e-05	0.00602
acidic amino acid transmembrane transporter activity (GO:0015172)	14	4	0.22	+	18.49	0.000136	0.0112			nucleoside-triphosphatase activity (GO:0017111)	803	22	8.69	+	2.53	8.47e-05	0.00699
oxidoreductase activity (GO:0016491)	781	27	12.07	+	2.24	0.000169	0.0137			nucleic acid binding (GO:0003676)	3021	55	32.7	+	1.68	9.84e-05	0.00783
scaffold protein binding (GO:0097110)	71	7	1.1	+	6.38	0.000186	0.0145			transferase activity, transferring acyl groups, acyl groups converted into alkyl on transfer (GO:0046912)	6	3	0.06	+	46.19	9.72e-05	0.00787
mRNA CDS binding (GO:1990715)	5	3	0.08	+	38.83	0.000185	0.0147			single-stranded RNA binding (GO:0003727)	95	7	1.03	+	6.81	0.000115	0.00872
pre-mRNA binding (GO:0036002)	33	5	0.51	+	9.81	0.000263	0.0199			phospholipase binding (GO:0043274)	20	4	0.22	+	18.47	0.000115	0.00886
sodium channel regulator activity (GO:0017080)	33	5	0.51	+	9.81	0.000263	0.0202			glutamate receptor binding (GO:0035254)	65	6	0.7	+	8.53	0.000114	0.00888
G-protein coupled receptor activity (GO:0004930)	732	1	11.31	-	0.09	0.000299	0.0222			aminoacyl-tRNA ligase activity (GO:0004812)	41	5	0.44	+	11.27	0.000129	0.00947
protein homodimerization activity (GO:0042803)	908	29	14.03	+	2.07	0.000308	0.0226			ligase activity, forming carbon-oxygen bonds (GO:0016875)	41	5	0.44	+	11.27	0.000129	0.00963
active transmembrane transporter activity (GO:0022804)	338	15	5.22	+	2.87	0.000365	0.0263			ATP binding (GO:0005524)	1377	31	14.91	+	2.08	0.000135	0.00972
phosphatidylinositol binding (GO:0035091)	237	12	3.66	+	3.28	0.000463	0.0328			ion binding (GO:0043167)	5358	84	58	+	1.45	0.000194	0.0138
ribonucleoprotein complex binding (GO:0043021)	141	9	2.18	+	4.13	0.0005	0.0349			enoyl-CoA hydratase activity (GO:0004300)	10	3	0.11	+	27.71	0.00032	0.0224
protein-containing complex scaffold activity (GO:0032947)	86	7	1.33	+	5.27	0.000549	0.0378			clathrin binding (GO:0030276)	52	5	0.56	+	8.88	0.00036	0.0247
coenzyme binding (GO:0050662)	282	13	4.36	+	2.98	0.000634	0.0423			active transmembrane transporter activity (GO:0022804)	338	12	3.66	+	3.28	0.00042	0.0284
proton transmembrane transporter activity (GO:0015078)	116	8	1.79	+	4.46	0.000632	0.0428			hydro-lyase activity (GO:0016836)	55	5	0.6	+	8.4	0.000457	0.0305
pre-mRNA intronic binding (GO:0097157)	9	3	0.14	+	21.57	0.000694	0.045			protein binding, bridging (GO:0030674)	121	7	1.31	+	5.34	0.000467	0.0307
carbon-nitrogen ligase activity, with glutamine as amido-N-donor (GO:0016884)	9	3	0.14	+	21.57	0.000694	0.0456			protein heterodimerization activity (GO:0046982)	564	16	6.11	+	2.62	0.000554	0.0359
Ras GTPase binding (GO:0017016)	401	16	6.2	+	2.58	0.000714	0.0456			ATPase activity, coupled to transmembrane movement of ions, rotational mechanism (GO:0044769)	32	4	0.35	+	11.55	0.000577	0.0369
										hydrolase activity (GO:0016787)	2475	45	26.79	+	1.68	0.000619	0.039
										G-protein coupled receptor activity (GO:0004930)	732	0	7.92	-	< 0.01	0.000694	0.0431
										cofactor binding (GO:0048037)	527	15	5.71	+	2.63	0.000795	0.0487
										catalytic activity, acting on RNA (GO:0140098)	315	11	3.41	+	3.23	0.000826	0.05

## Sheet: S8 GO Cell Compt
G-CSF vs Saline										Coc vs Saline										G-CSF+Coc vs Saline
GO cellular component complete	Mus musculus - REFLIST (22262)	upload_1 (344)	upload_1 (expected)	upload_1 (over/under)	upload_1 (fold Enrichment)	upload_1 (raw P-value)	upload_1 (FDR)			GO cellular component complete	Mus musculus - REFLIST (22262)	upload_1 (241)	upload_1 (expected)	upload_1 (over/under)	upload_1 (fold Enrichment)	upload_1 (raw P-value)	upload_1 (FDR)			GO cellular component complete	Mus musculus - REFLIST (22262)	upload_1 (186)	upload_1 (expected)	upload_1 (over/under)	upload_1 (fold Enrichment)	upload_1 (raw P-value)	upload_1 (FDR)
cytoplasm (GO:0005737)	10748	301	166.08	+	1.81	4.2e-52	8.2e-49			cytoplasmic part (GO:0044444)	8279	187	89.63	+	2.09	6.08e-37	5.93e-34			cytoplasmic part (GO:0044444)	8279	142	69.17	+	2.05	3.11e-27	6.07e-24
intracellular (GO:0005622)	13526	325	209.01	+	1.55	4.88e-47	4.76e-44			cytoplasm (GO:0005737)	10748	211	116.35	+	1.81	3.3e-37	6.45e-34			cytoplasm (GO:0005737)	10748	159	89.8	+	1.77	5.06e-26	4.94e-23
intracellular part (GO:0044424)	13454	323	207.9	+	1.55	7.24e-46	4.71e-43			intracellular (GO:0005622)	13526	226	146.43	+	1.54	6.68e-32	4.34e-29			intracellular part (GO:0044424)	13454	173	112.41	+	1.54	7.56e-24	4.92e-21
cytoplasmic part (GO:0044444)	8279	258	127.93	+	2.02	2.25e-45	1.1e-42			intracellular part (GO:0044424)	13454	225	145.65	+	1.54	2.14e-31	1.04e-28			intracellular (GO:0005622)	13526	173	113.01	+	1.53	1.61e-23	7.83e-21
organelle (GO:0043226)	11968	300	184.93	+	1.62	1.38e-39	5.37e-37			organelle (GO:0043226)	11968	206	129.56	+	1.59	2.66e-25	1.04e-22			organelle part (GO:0044422)	7373	126	61.6	+	2.05	1.01e-21	3.93e-19
intracellular organelle (GO:0043229)	11722	296	181.13	+	1.63	9.84e-39	3.2e-36			intracellular organelle (GO:0043229)	11722	203	126.9	+	1.6	1.31e-24	4.25e-22			intracellular organelle part (GO:0044446)	7114	123	59.44	+	2.07	2.35e-21	7.65e-19
cell (GO:0005623)	15913	335	245.89	+	1.36	1.29e-36	3.16e-34			cell (GO:0005623)	15913	233	172.27	+	1.35	3.11e-24	7.59e-22			intracellular organelle (GO:0043229)	11722	158	97.94	+	1.61	3.24e-20	7.02e-18
cell part (GO:0044464)	15911	335	245.86	+	1.36	1.29e-36	3.61e-34			cell part (GO:0044464)	15911	233	172.25	+	1.35	3.1e-24	8.65e-22			non-membrane-bounded organelle (GO:0043228)	4022	89	33.6	+	2.65	2.97e-20	7.24e-18
intracellular organelle part (GO:0044446)	7114	224	109.93	+	2.04	9.53e-36	2.06e-33			intracellular organelle part (GO:0044446)	7114	148	77.01	+	1.92	1.27e-20	2.75e-18			intracellular non-membrane-bounded organelle (GO:0043232)	4022	89	33.6	+	2.65	2.97e-20	8.27e-18
organelle part (GO:0044422)	7373	227	113.93	+	1.99	8.93e-35	1.74e-32			organelle part (GO:0044422)	7373	151	79.82	+	1.89	1.47e-20	2.87e-18			organelle (GO:0043226)	11968	158	99.99	+	1.58	3.31e-19	6.45e-17
protein-containing complex (GO:0032991)	5391	183	83.3	+	2.2	4.81e-30	8.53e-28			non-membrane-bounded organelle (GO:0043228)	4022	104	43.54	+	2.39	3.62e-19	5.89e-17			cytosol (GO:0005829)	3412	76	28.51	+	2.67	7.16e-17	1.27e-14
membrane-bounded organelle (GO:0043227)	10752	267	166.14	+	1.61	2.71e-28	4.4e-26			intracellular non-membrane-bounded organelle (GO:0043232)	4022	104	43.54	+	2.39	3.62e-19	6.43e-17			cell (GO:0005623)	15913	177	132.95	+	1.33	2.29e-16	3.44e-14
intracellular membrane-bounded organelle (GO:0043231)	10056	247	155.39	+	1.59	4.76e-23	7.15e-21			mitochondrion (GO:0005739)	1765	62	19.11	+	3.24	1.39e-16	2.09e-14			cell part (GO:0044464)	15911	177	132.94	+	1.33	2.28e-16	3.7e-14
mitochondrion (GO:0005739)	1765	87	27.27	+	3.19	6.14e-22	8.55e-20			protein-containing complex (GO:0032991)	5391	117	58.36	+	2	4.31e-16	6e-14			cytoskeletal part (GO:0044430)	1495	47	12.49	+	3.76	2.85e-15	3.97e-13
ribonucleoprotein complex (GO:1990904)	869	59	13.43	+	4.39	6.58e-21	8.55e-19			cytosol (GO:0005829)	3412	88	36.94	+	2.38	1.18e-15	1.53e-13			cytoskeleton (GO:0005856)	2031	54	16.97	+	3.18	1.32e-14	1.71e-12
non-membrane-bounded organelle (GO:0043228)	4022	135	62.15	+	2.17	7.74e-20	8.88e-18			membrane-bounded organelle (GO:0043227)	10752	177	116.4	+	1.52	3.55e-15	4.33e-13			cell projection (GO:0042995)	2359	56	19.71	+	2.84	3.81e-13	4.65e-11
intracellular non-membrane-bounded organelle (GO:0043232)	4022	135	62.15	+	2.17	7.74e-20	9.43e-18			cytoskeleton (GO:0005856)	2031	64	21.99	+	2.91	6.12e-15	7.03e-13			plasma membrane bounded cell projection (GO:0120025)	2174	52	18.16	+	2.86	2.69e-12	3.09e-10
synapse (GO:0045202)	1022	62	15.79	+	3.93	1.22e-19	1.32e-17			intracellular membrane-bounded organelle (GO:0043231)	10056	168	108.86	+	1.54	2.46e-14	2.66e-12			protein-containing complex (GO:0032991)	5391	88	45.04	+	1.95	1.19e-11	1.29e-09
organelle membrane (GO:0031090)	1657	79	25.6	+	3.09	5.2e-19	5.34e-17			myelin sheath (GO:0043209)	212	21	2.3	+	9.15	9.47e-14	9.72e-12			cytoplasmic region (GO:0099568)	445	22	3.72	+	5.92	5.46e-11	5.61e-09
neuron part (GO:0097458)	1763	81	27.24	+	2.97	1.38e-18	1.35e-16			ribonucleoprotein complex (GO:1990904)	869	39	9.41	+	4.15	1.21e-13	1.18e-11			actin cytoskeleton (GO:0015629)	464	22	3.88	+	5.67	1.17e-10	1.14e-08
cytosol (GO:0005829)	3412	118	52.72	+	2.24	8.84e-18	8.21e-16			cytoskeletal part (GO:0044430)	1495	51	16.18	+	3.15	3.83e-13	3.56e-11			neuron projection (GO:0043005)	1459	38	12.19	+	3.12	4.69e-10	4.35e-08
neuron projection (GO:0043005)	1459	71	22.54	+	3.15	1.7e-17	1.51e-15			neuron part (GO:0097458)	1763	53	19.09	+	2.78	1.36e-11	1.21e-09			perinuclear region of cytoplasm (GO:0048471)	630	24	5.26	+	4.56	1.11e-09	9.84e-08
cell projection (GO:0042995)	2359	93	36.45	+	2.55	3.66e-17	3.1e-15			neuron projection (GO:0043005)	1459	47	15.79	+	2.98	2.64e-11	2.24e-09			membrane-bounded organelle (GO:0043227)	10752	131	89.83	+	1.46	1.39e-09	1.18e-07
mitochondrial part (GO:0044429)	799	51	12.35	+	4.13	4.52e-17	3.68e-15			plasma membrane bounded cell projection (GO:0120025)	2174	58	23.53	+	2.46	1.31e-10	1.07e-08			supramolecular fiber (GO:0099512)	875	28	7.31	+	3.83	1.77e-09	1.44e-07
plasma membrane bounded cell projection (GO:0120025)	2174	88	33.59	+	2.62	6.34e-17	4.95e-15			cell projection (GO:0042995)	2359	61	25.54	+	2.39	1.51e-10	1.18e-08			supramolecular complex (GO:0099080)	881	28	7.36	+	3.8	2.05e-09	1.54e-07
mitochondrial membrane (GO:0031966)	575	42	8.89	+	4.73	4.42e-16	3.32e-14			supramolecular fiber (GO:0099512)	875	34	9.47	+	3.59	2.2e-10	1.65e-08			supramolecular polymer (GO:0099081)	880	28	7.35	+	3.81	2e-09	1.56e-07
mitochondrial inner membrane (GO:0005743)	398	35	6.15	+	5.69	8.6e-16	6.21e-14			supramolecular complex (GO:0099080)	881	34	9.54	+	3.56	2.62e-10	1.82e-08			neuron part (GO:0097458)	1763	41	14.73	+	2.78	2.25e-09	1.62e-07
mitochondrial envelope (GO:0005740)	617	43	9.53	+	4.51	9.2e-16	6.41e-14			supramolecular polymer (GO:0099081)	880	34	9.53	+	3.57	2.54e-10	1.84e-08			myelin sheath (GO:0043209)	212	14	1.77	+	7.9	6.57e-09	4.58e-07
synapse part (GO:0044456)	808	49	12.49	+	3.92	1.33e-15	8.98e-14			polysome (GO:0005844)	76	11	0.82	+	13.37	2.32e-09	1.56e-07			actin filament bundle (GO:0032432)	86	10	0.72	+	13.92	7.29e-09	4.9e-07
organelle inner membrane (GO:0019866)	440	36	6.8	+	5.29	2.59e-15	1.68e-13			synapse (GO:0045202)	1022	35	11.06	+	3.16	2.89e-09	1.88e-07			integral component of membrane (GO:0016021)	5708	16	47.69	-	0.34	8.06e-09	5.24e-07
organelle envelope (GO:0031967)	1004	54	15.51	+	3.48	4.75e-15	2.99e-13			actin cytoskeleton (GO:0015629)	464	23	5.02	+	4.58	3.15e-09	1.98e-07			vesicle (GO:0031982)	1887	41	15.77	+	2.6	1.52e-08	9.56e-07
envelope (GO:0031975)	1005	54	15.53	+	3.48	4.94e-15	3.01e-13			organelle inner membrane (GO:0019866)	440	22	4.76	+	4.62	6.07e-09	3.7e-07			axon (GO:0030424)	671	23	5.61	+	4.1	1.71e-08	1.04e-06
postsynapse (GO:0098794)	539	39	8.33	+	4.68	7.16e-15	4.23e-13			axon (GO:0030424)	671	27	7.26	+	3.72	9.23e-09	5.46e-07			cytosolic part (GO:0044445)	273	15	2.28	+	6.58	1.94e-08	1.14e-06
membrane protein complex (GO:0098796)	1136	56	17.55	+	3.19	4.58e-14	2.63e-12			ribosome (GO:0005840)	265	17	2.87	+	5.93	1.14e-08	6.56e-07			adherens junction (GO:0005912)	278	15	2.32	+	6.46	2.43e-08	1.4e-06
cell junction (GO:0030054)	1093	54	16.89	+	3.2	1.28e-13	7.12e-12			cytosolic part (GO:0044445)	273	17	2.96	+	5.75	1.73e-08	9.64e-07			ribonucleoprotein complex (GO:1990904)	869	26	7.26	+	3.58	2.7e-08	1.5e-06
inner mitochondrial membrane protein complex (GO:0098800)	135	20	2.09	+	9.59	2.9e-13	1.57e-11			polymeric cytoskeletal fiber (GO:0099513)	655	26	7.09	+	3.67	2.31e-08	1.15e-06			cell cortex (GO:0005938)	288	15	2.41	+	6.23	3.79e-08	2.06e-06
cytoskeleton (GO:0005856)	2031	76	31.38	+	2.42	8.03e-13	4.23e-11			mitochondrial part (GO:0044429)	799	29	8.65	+	3.35	2.25e-08	1.18e-06			anchoring junction (GO:0070161)	292	15	2.44	+	6.15	4.51e-08	2.38e-06
postsynaptic density (GO:0014069)	281	26	4.34	+	5.99	1.74e-12	8.95e-11			envelope (GO:0031975)	1005	33	10.88	+	3.03	2.3e-08	1.18e-06			cell junction (GO:0030054)	1093	29	9.13	+	3.18	4.99e-08	2.56e-06
asymmetric synapse (GO:0032279)	285	26	4.4	+	5.9	2.34e-12	1.14e-10			organelle envelope (GO:0031967)	1004	33	10.87	+	3.04	2.24e-08	1.22e-06			cell cortex part (GO:0044448)	182	12	1.52	+	7.89	8.29e-08	4.15e-06
postsynaptic specialization (GO:0099572)	285	26	4.4	+	5.9	2.34e-12	1.17e-10			mitochondrial inner membrane (GO:0005743)	398	20	4.31	+	4.64	2.83e-08	1.38e-06			intrinsic component of membrane (GO:0031224)	5868	19	49.03	-	0.39	8.54e-08	4.16e-06
neuron to neuron synapse (GO:0098984)	288	26	4.45	+	5.84	2.92e-12	1.39e-10			cytoplasmic region (GO:0099568)	445	21	4.82	+	4.36	3.52e-08	1.68e-06			actomyosin (GO:0042641)	88	9	0.74	+	12.24	1.16e-07	5.51e-06
somatodendritic compartment (GO:0036477)	1012	49	15.64	+	3.13	4.03e-12	1.87e-10			oxidoreductase complex (GO:1990204)	105	11	1.14	+	9.68	4.95e-08	2.25e-06			cytosolic ribosome (GO:0022626)	152	11	1.27	+	8.66	1.21e-07	5.61e-06
plasma membrane bounded cell projection part (GO:0120038)	1485	61	22.95	+	2.66	5.68e-12	2.52e-10			cell junction (GO:0030054)	1093	34	11.83	+	2.87	4.9e-08	2.28e-06			organelle membrane (GO:0031090)	1657	36	13.84	+	2.6	1.39e-07	6.31e-06
cell projection part (GO:0044463)	1485	61	22.95	+	2.66	5.68e-12	2.58e-10			synapse part (GO:0044456)	808	28	8.75	+	3.2	1.02e-07	4.5e-06			polymeric cytoskeletal fiber (GO:0099513)	655	21	5.47	+	3.84	2.2e-07	9.75e-06
myelin sheath (GO:0043209)	212	22	3.28	+	6.72	1.21e-11	5.23e-10			organelle membrane (GO:0031090)	1657	43	17.94	+	2.4	1.13e-07	4.9e-06			cytoplasmic vesicle (GO:0031410)	1768	37	14.77	+	2.5	2.25e-07	9.77e-06
cytosolic ribosome (GO:0022626)	152	19	2.35	+	8.09	1.7e-11	7.05e-10			polysomal ribosome (GO:0042788)	30	7	0.32	+	21.55	1.16e-07	4.92e-06			intracellular vesicle (GO:0097708)	1773	37	14.81	+	2.5	3.93e-07	1.66e-05
mitochondrial membrane part (GO:0044455)	216	22	3.34	+	6.59	1.69e-11	7.15e-10			cortical cytoskeleton (GO:0030863)	117	11	1.27	+	8.68	1.37e-07	5.68e-06			polysome (GO:0005844)	76	8	0.63	+	12.6	4.87e-07	2.02e-05
nuclear periphery (GO:0034399)	117	17	1.81	+	9.4	2.39e-11	9.71e-10			postsynapse (GO:0098794)	539	22	5.84	+	3.77	1.87e-07	7.59e-06			stress fiber (GO:0001725)	77	8	0.64	+	12.44	5.34e-07	2.12e-05
dendrite (GO:0030425)	706	38	10.91	+	3.48	7.57e-11	3.01e-09			cell cortex part (GO:0044448)	182	13	1.97	+	6.6	1.98e-07	7.9e-06			contractile actin filament bundle (GO:0097517)	77	8	0.64	+	12.44	5.34e-07	2.17e-05
cell leading edge (GO:0031252)	365	27	5.64	+	4.79	7.74e-11	3.02e-09			cytosolic ribosome (GO:0022626)	152	12	1.65	+	7.29	2.16e-07	8.42e-06			ribosome (GO:0005840)	265	13	2.21	+	5.87	6.04e-07	2.36e-05
dendritic tree (GO:0097447)	709	38	10.96	+	3.47	8.5e-11	3.25e-09			intermediate filament (GO:0005882)	127	11	1.37	+	8	2.95e-07	1.13e-05			intracellular membrane-bounded organelle (GO:0043231)	10056	118	84.02	+	1.4	8.14e-07	3.12e-05
mitochondrial protein complex (GO:0098798)	264	23	4.08	+	5.64	1.05e-10	3.94e-09			plasma membrane bounded cell projection part (GO:0120038)	1485	39	16.08	+	2.43	3.88e-07	1.43e-05			cortical cytoskeleton (GO:0030863)	117	9	0.98	+	9.21	1.09e-06	4.07e-05
actin cytoskeleton (GO:0015629)	464	30	7.17	+	4.18	1.46e-10	5.36e-09			cell projection part (GO:0044463)	1485	39	16.08	+	2.43	3.88e-07	1.46e-05			endomembrane system (GO:0012505)	3703	58	30.94	+	1.87	1.46e-06	5.36e-05
cytoskeletal part (GO:0044430)	1495	58	23.1	+	2.51	1.96e-10	7.1e-09			mitochondrial envelope (GO:0005740)	617	23	6.68	+	3.44	4.52e-07	1.63e-05			cell-cell junction (GO:0005911)	458	16	3.83	+	4.18	2.29e-06	8.27e-05
polysome (GO:0005844)	76	13	1.17	+	11.07	9.3e-10	3.3e-08			intracellular organelle lumen (GO:0070013)	3949	75	42.75	+	1.75	4.7e-07	1.67e-05			cell body (GO:0044297)	774	21	6.47	+	3.25	2.96e-06	0.000105
axon (GO:0030424)	671	35	10.37	+	3.38	9.82e-10	3.42e-08			mitochondrial membrane (GO:0031966)	575	22	6.22	+	3.53	5.35e-07	1.8e-05			whole membrane (GO:0098805)	1052	25	8.79	+	2.84	3.22e-06	0.000112
cytosolic part (GO:0044445)	273	22	4.22	+	5.22	1.06e-09	3.61e-08			inner mitochondrial membrane protein complex (GO:0098800)	135	11	1.46	+	7.53	5.2e-07	1.81e-05			ribosomal subunit (GO:0044391)	226	11	1.89	+	5.83	4.87e-06	0.000167
intracellular organelle lumen (GO:0070013)	3949	108	61.02	+	1.77	1.09e-09	3.61e-08			cell body (GO:0044297)	774	26	8.38	+	3.1	5.31e-07	1.82e-05			neuron projection cytoplasm (GO:0120111)	48	6	0.4	+	14.96	5.54e-06	0.000186
membrane-enclosed lumen (GO:0031974)	3954	108	61.1	+	1.77	1.14e-09	3.64e-08			ribonucleoprotein granule (GO:0035770)	202	13	2.19	+	5.94	6.07e-07	2.01e-05			uropod (GO:0001931)	11	4	0.09	+	43.52	5.8e-06	0.000189
cytoplasmic region (GO:0099568)	445	28	6.88	+	4.07	1.09e-09	3.66e-08			perinuclear region of cytoplasm (GO:0048471)	630	23	6.82	+	3.37	6.39e-07	2.08e-05			cell trailing edge (GO:0031254)	11	4	0.09	+	43.52	5.8e-06	0.000192
organelle lumen (GO:0043233)	3954	108	61.1	+	1.77	1.14e-09	3.7e-08			membrane-enclosed lumen (GO:0031974)	3954	75	42.8	+	1.75	6.82e-07	2.08e-05			focal adhesion (GO:0005925)	146	9	1.22	+	7.38	6.03e-06	0.000193
ribosomal subunit (GO:0044391)	226	20	3.49	+	5.73	1.39e-09	4.37e-08			cellular_component (GO:0005575)	20931	241	226.59	+	1.06	6.64e-07	2.09e-05			synapse (GO:0045202)	1022	24	8.54	+	2.81	6.27e-06	0.000197
ribosome (GO:0005840)	265	21	4.09	+	5.13	3.36e-09	1.04e-07			organelle lumen (GO:0043233)	3954	75	42.8	+	1.75	6.82e-07	2.11e-05			cell-substrate adherens junction (GO:0005924)	152	9	1.27	+	7.09	8.21e-06	0.000254
nuclear matrix (GO:0016363)	86	13	1.33	+	9.78	3.57e-09	1.09e-07			Unclassified (UNCLASSIFIED)	1331	0	14.41	-	< 0.01	6.64e-07	2.12e-05			plasma membrane bounded cell projection part (GO:0120038)	1485	30	12.41	+	2.42	9.67e-06	0.00029
nuclear part (GO:0044428)	4014	107	62.03	+	1.73	5.5e-09	1.63e-07			mitochondrial membrane part (GO:0044455)	216	13	2.34	+	5.56	1.24e-06	3.71e-05			nuclear periphery (GO:0034399)	117	8	0.98	+	8.18	9.84e-06	0.000291
axon part (GO:0033267)	418	26	6.46	+	4.03	5.48e-09	1.64e-07			intrinsic component of membrane (GO:0031224)	5868	32	63.52	-	0.5	1.36e-06	4.03e-05			cell projection part (GO:0044463)	1485	30	12.41	+	2.42	9.67e-06	0.000295
cell cortex (GO:0005938)	288	21	4.45	+	4.72	1.32e-08	3.84e-07			ribosomal subunit (GO:0044391)	226	13	2.45	+	5.31	1.99e-06	5.8e-05			cell-substrate junction (GO:0030055)	159	9	1.33	+	6.77	1.16e-05	0.000327
spliceosomal complex (GO:0005681)	184	17	2.84	+	5.98	1.35e-08	3.86e-07			neuronal cell body (GO:0043025)	688	23	7.45	+	3.09	2.7e-06	7.75e-05			ribonucleoprotein granule (GO:0035770)	202	10	1.69	+	5.93	1.15e-05	0.00033
catalytic step 2 spliceosome (GO:0071013)	83	12	1.28	+	9.36	2.25e-08	6.35e-07			intermediate filament cytoskeleton (GO:0045111)	165	11	1.79	+	6.16	3.28e-06	9.27e-05			cytosolic small ribosomal subunit (GO:0022627)	55	6	0.46	+	13.06	1.14e-05	0.000331
endomembrane system (GO:0012505)	3703	99	57.22	+	1.73	2.44e-08	6.79e-07			postsynaptic density (GO:0014069)	281	14	3.04	+	4.6	3.97e-06	0.000111			axon part (GO:0033267)	418	14	3.49	+	4.01	1.58e-05	0.000441
vesicle (GO:0031982)	1887	62	29.16	+	2.13	2.95e-08	8.1e-07			COP9 signalosome (GO:0008180)	35	6	0.38	+	15.84	4.66e-06	0.000121			cell leading edge (GO:0031252)	365	13	3.05	+	4.26	1.73e-05	0.000474
actomyosin (GO:0042641)	88	12	1.36	+	8.82	4.03e-08	1.09e-06			cytosolic small ribosomal subunit (GO:0022627)	55	7	0.6	+	11.76	4.41e-06	0.000121			heterochromatin (GO:0000792)	91	7	0.76	+	9.21	1.75e-05	0.000476
vesicle membrane (GO:0012506)	311	21	4.81	+	4.37	4.55e-08	1.2e-06			asymmetric synapse (GO:0032279)	285	14	3.09	+	4.54	4.63e-06	0.000122			smooth endoplasmic reticulum (GO:0005790)	35	5	0.29	+	17.1	1.92e-05	0.000514
cytosolic large ribosomal subunit (GO:0022625)	89	12	1.38	+	8.73	4.51e-08	1.21e-06			nuclear part (GO:0044428)	4014	73	43.45	+	1.68	4.51e-06	0.000122			neuronal cell body (GO:0043025)	688	18	5.75	+	3.13	2.51e-05	0.000662
cell cortex part (GO:0044448)	182	16	2.81	+	5.69	6.84e-08	1.78e-06			postsynaptic specialization (GO:0099572)	285	14	3.09	+	4.54	4.63e-06	0.000124			perikaryon (GO:0043204)	135	8	1.13	+	7.09	2.62e-05	0.000681
cell body (GO:0044297)	774	34	11.96	+	2.84	9.71e-08	2.49e-06			integral component of membrane (GO:0016021)	5708	32	61.79	-	0.52	4.83e-06	0.000124			cytoplasmic vesicle part (GO:0044433)	502	15	4.19	+	3.58	2.85e-05	0.000732
cortical cytoskeleton (GO:0030863)	117	13	1.81	+	7.19	9.89e-08	2.51e-06			neuron to neuron synapse (GO:0098984)	288	14	3.12	+	4.49	5.19e-06	0.00013			mitochondrion (GO:0005739)	1765	32	14.75	+	2.17	3.34e-05	0.000835
perinuclear region of cytoplasm (GO:0048471)	630	30	9.73	+	3.08	1.11e-07	2.79e-06			cell cortex (GO:0005938)	288	14	3.12	+	4.49	5.19e-06	0.000132			endocytic vesicle (GO:0030139)	183	9	1.53	+	5.89	3.34e-05	0.000845
whole membrane (GO:0098805)	1052	41	16.26	+	2.52	1.36e-07	3.35e-06			small ribosomal subunit (GO:0015935)	82	8	0.89	+	9.01	5.61e-06	0.000139			cytoplasmic vesicle membrane (GO:0030659)	283	11	2.36	+	4.65	3.63e-05	0.000897
coated membrane (GO:0048475)	104	12	1.61	+	7.47	2.12e-07	5.12e-06			somatodendritic compartment (GO:0036477)	1012	28	10.96	+	2.56	7.34e-06	0.000179			distal axon (GO:0150034)	338	12	2.82	+	4.25	3.77e-05	0.000919
membrane coat (GO:0030117)	104	12	1.61	+	7.47	2.12e-07	5.18e-06			nucleus (GO:0005634)	6640	105	71.88	+	1.46	7.41e-06	0.000179			cytoplasmic ribonucleoprotein granule (GO:0036464)	191	9	1.6	+	5.64	4.59e-05	0.00111
ribonucleoprotein granule (GO:0035770)	202	16	3.12	+	5.13	2.57e-07	6.11e-06			actin filament bundle (GO:0032432)	86	8	0.93	+	8.59	7.76e-06	0.000185			growth cone (GO:0030426)	192	9	1.6	+	5.61	4.77e-05	0.00113
plasma membrane region (GO:0098590)	1052	40	16.26	+	2.46	3.08e-07	7.23e-06			nuclear periphery (GO:0034399)	117	9	1.27	+	7.11	8.86e-06	0.000208			somatodendritic compartment (GO:0036477)	1012	22	8.46	+	2.6	4.91e-05	0.00115
cellular_component (GO:0005575)	20931	342	323.43	+	1.06	3.65e-07	8.37e-06			actomyosin (GO:0042641)	88	8	0.95	+	8.4	9.08e-06	0.000211			endosome (GO:0005768)	798	19	6.67	+	2.85	5.17e-05	0.0012
Unclassified (UNCLASSIFIED)	1331	2	20.57	-	0.1	3.65e-07	8.47e-06			mitochondrial protein complex (GO:0098798)	264	13	2.86	+	4.55	9.93e-06	0.000228			site of polarized growth (GO:0030427)	195	9	1.63	+	5.52	5.35e-05	0.00123
lamellipodium (GO:0030027)	158	14	2.44	+	5.73	4.16e-07	9.44e-06			mitochondrial proton-transporting ATP synthase complex (GO:0005753)	23	5	0.25	+	20.08	1.09e-05	0.000246			synapse part (GO:0044456)	808	19	6.75	+	2.81	6.08e-05	0.00138
intrinsic component of membrane (GO:0031224)	5868	51	90.67	-	0.56	4.63e-07	1.04e-05			proton-transporting ATP synthase complex (GO:0045259)	24	5	0.26	+	19.24	1.3e-05	0.000292			vesicle membrane (GO:0012506)	311	11	2.6	+	4.23	8.23e-05	0.00185
integral component of membrane (GO:0016021)	5708	49	88.2	-	0.56	5.03e-07	1.11e-05			endomembrane system (GO:0012505)	3703	67	40.09	+	1.67	1.75e-05	0.000388			cell-cell contact zone (GO:0044291)	81	6	0.68	+	8.87	8.64e-05	0.00189
supramolecular fiber (GO:0099512)	875	35	13.52	+	2.59	5.26e-07	1.15e-05			neuron projection cytoplasm (GO:0120111)	48	6	0.52	+	11.55	2.38e-05	0.000522			exocytic vesicle (GO:0070382)	208	9	1.74	+	5.18	8.6e-05	0.00191
supramolecular polymer (GO:0099081)	880	35	13.6	+	2.57	5.97e-07	1.29e-05			tricarboxylic acid cycle enzyme complex (GO:0045239)	13	4	0.14	+	28.42	2.74e-05	0.000587			small ribosomal subunit (GO:0015935)	82	6	0.69	+	8.76	9.21e-05	0.002
cytoplasmic vesicle part (GO:0044433)	502	25	7.76	+	3.22	6.09e-07	1.3e-05			nuclear lamina (GO:0005652)	13	4	0.14	+	28.42	2.74e-05	0.000593			intermediate filament cytoskeleton (GO:0045111)	165	8	1.38	+	5.8	0.000101	0.00214
supramolecular complex (GO:0099080)	881	35	13.61	+	2.57	6.13e-07	1.3e-05			stress fiber (GO:0001725)	77	7	0.83	+	8.4	3.33e-05	0.000698			plasma membrane bounded cell projection cytoplasm (GO:0032838)	165	8	1.38	+	5.8	0.000101	0.00216
neuron spine (GO:0044309)	190	15	2.94	+	5.11	6.34e-07	1.33e-05			contractile actin filament bundle (GO:0097517)	77	7	0.83	+	8.4	3.33e-05	0.000706			clathrin vesicle coat (GO:0030125)	26	4	0.22	+	18.41	0.000106	0.00217
neuronal cell body (GO:0043025)	688	30	10.63	+	2.82	6.63e-07	1.36e-05			dendrite (GO:0030425)	706	21	7.64	+	2.75	3.99e-05	0.000828			apical dendrite (GO:0097440)	26	4	0.22	+	18.41	0.000106	0.00219
ruffle (GO:0001726)	140	13	2.16	+	6.01	6.61e-07	1.37e-05			dendritic tree (GO:0097447)	709	21	7.68	+	2.74	4.23e-05	0.000869			cortical actin cytoskeleton (GO:0030864)	84	6	0.7	+	8.55	0.000104	0.00219
nuclear lumen (GO:0031981)	3546	91	54.79	+	1.66	8.36e-07	1.7e-05			membrane protein complex (GO:0098796)	1136	28	12.3	+	2.28	5.79e-05	0.00118			organelle envelope (GO:0031967)	1004	21	8.39	+	2.5	0.000125	0.00254
cytoplasmic vesicle membrane (GO:0030659)	283	18	4.37	+	4.12	9.54e-07	1.92e-05			nuclear lumen (GO:0031981)	3546	63	38.39	+	1.64	6.08e-05	0.00122			envelope (GO:0031975)	1005	21	8.4	+	2.5	0.000127	0.00255
nucleus (GO:0005634)	6640	146	102.6	+	1.42	1e-06	2e-05			cytoplasmic ribonucleoprotein granule (GO:0036464)	191	10	2.07	+	4.84	6.53e-05	0.00129			intermediate filament (GO:0005882)	127	7	1.06	+	6.6	0.00013	0.00256
cytoplasmic vesicle (GO:0031410)	1768	55	27.32	+	2.01	1.07e-06	2.12e-05			lamin filament (GO:0005638)	5	3	0.05	+	55.42	6.53e-05	0.0013			contractile fiber (GO:0043292)	220	9	1.84	+	4.9	0.000129	0.00258
intracellular vesicle (GO:0097708)	1773	55	27.4	+	2.01	1.12e-06	2.19e-05			axon part (GO:0033267)	418	15	4.53	+	3.31	7.28e-05	0.00142			basolateral plasma membrane (GO:0016323)	223	9	1.86	+	4.83	0.000143	0.00279
polysomal ribosome (GO:0042788)	30	7	0.46	+	15.1	1.24e-06	2.39e-05			plasma membrane region (GO:0098590)	1052	26	11.39	+	2.28	0.000106	0.00205			vesicle coat (GO:0030120)	56	5	0.47	+	10.69	0.000151	0.00286
large ribosomal subunit (GO:0015934)	149	13	2.3	+	5.65	1.27e-06	2.42e-05			nucleoplasm (GO:0005654)	2735	51	29.61	+	1.72	0.000109	0.00208			flotillin complex (GO:0016600)	10	3	0.08	+	35.91	0.000151	0.00288
cortical actin cytoskeleton (GO:0030864)	84	10	1.3	+	7.7	1.7e-06	3.23e-05			oxoglutarate dehydrogenase complex (GO:0045252)	7	3	0.08	+	39.59	0.000138	0.00261			neurofilament (GO:0005883)	10	3	0.08	+	35.91	0.000151	0.00291
actin filament bundle (GO:0032432)	86	10	1.33	+	7.53	2.07e-06	3.88e-05			brush border (GO:0005903)	133	8	1.44	+	5.56	0.000144	0.00269			postsynaptic density (GO:0014069)	281	10	2.35	+	4.26	0.000165	0.0031
dendritic shaft (GO:0043198)	67	9	1.04	+	8.69	2.29e-06	4.26e-05			tRNA-splicing ligase complex (GO:0072669)	8	3	0.09	+	34.64	0.000188	0.00349			polysomal ribosome (GO:0042788)	30	4	0.25	+	15.96	0.000174	0.00324
dendritic spine (GO:0043197)	187	14	2.89	+	4.84	2.69e-06	4.95e-05			cell-cell junction (GO:0005911)	458	15	4.96	+	3.03	0.000192	0.00353			nucleosome (GO:0000786)	58	5	0.48	+	10.32	0.000176	0.00324
smooth endoplasmic reticulum (GO:0005790)	35	7	0.54	+	12.94	3.03e-06	5.53e-05			contractile fiber (GO:0043292)	220	10	2.38	+	4.2	0.000198	0.00361			asymmetric synapse (GO:0032279)	285	10	2.38	+	4.2	0.000185	0.00334
cytoplasmic ribonucleoprotein granule (GO:0036464)	191	14	2.95	+	4.74	3.38e-06	6.11e-05			nucleoid (GO:0009295)	47	5	0.51	+	9.83	0.000233	0.00417			postsynaptic specialization (GO:0099572)	285	10	2.38	+	4.2	0.000185	0.00337
cell-cell junction (GO:0005911)	458	22	7.08	+	3.11	5.06e-06	9.06e-05			mitochondrial nucleoid (GO:0042645)	47	5	0.51	+	9.83	0.000233	0.00421			dendrite cytoplasm (GO:0032839)	31	4	0.26	+	15.44	0.000195	0.00344
bounding membrane of organelle (GO:0098588)	1010	36	15.61	+	2.31	5.96e-06	0.000106			mitochondrial respiratory chain complex I (GO:0005747)	48	5	0.52	+	9.62	0.000255	0.00444			transport vesicle (GO:0030133)	287	10	2.4	+	4.17	0.000195	0.00346
stress fiber (GO:0001725)	77	9	1.19	+	7.56	6.47e-06	0.000113			NADH dehydrogenase complex (GO:0030964)	48	5	0.52	+	9.62	0.000255	0.00448			midbody (GO:0030496)	136	7	1.14	+	6.16	0.000194	0.00347
contractile actin filament bundle (GO:0097517)	77	9	1.19	+	7.56	6.47e-06	0.000114			respiratory chain complex I (GO:0045271)	48	5	0.52	+	9.62	0.000255	0.00452			neuron to neuron synapse (GO:0098984)	288	10	2.41	+	4.16	0.0002	0.00349
mitochondrial respiratory chain (GO:0005746)	79	9	1.22	+	7.37	7.83e-06	0.000135			vesicle (GO:0031982)	1887	38	20.43	+	1.86	0.000269	0.00464			synaptic vesicle (GO:0008021)	186	8	1.55	+	5.15	0.000222	0.00383
cell-cell contact zone (GO:0044291)	81	9	1.25	+	7.19	9.43e-06	0.00016			proton-transporting two-sector ATPase complex (GO:0016469)	49	5	0.53	+	9.43	0.000279	0.00477			ruffle (GO:0001726)	140	7	1.17	+	5.98	0.00023	0.00393
respiratory chain complex (GO:0098803)	81	9	1.25	+	7.19	9.43e-06	0.000161			microtubule cytoskeleton (GO:0015630)	1112	26	12.04	+	2.16	0.000282	0.00478			clathrin-coated pit (GO:0005905)	62	5	0.52	+	9.65	0.000236	0.004
paraspeckles (GO:0042382)	6	4	0.09	+	43.14	1.03e-05	0.000173			mitochondrial respiratory chain (GO:0005746)	79	6	0.86	+	7.02	0.000306	0.0051			cellular_component (GO:0005575)	20931	185	174.88	+	1.06	0.000251	0.00415
oxidoreductase complex (GO:1990204)	105	10	1.62	+	6.16	1.06e-05	0.000177			adherens junction (GO:0005912)	278	11	3.01	+	3.66	0.000303	0.0051			microtubule cytoskeleton (GO:0015630)	1112	22	9.29	+	2.37	0.000248	0.00418
synaptic vesicle (GO:0008021)	186	13	2.87	+	4.52	1.22e-05	0.000202			flotillin complex (GO:0016600)	10	3	0.11	+	27.71	0.00032	0.00521			Unclassified (UNCLASSIFIED)	1331	1	11.12	-	0.09	0.000251	0.00418
adherens junction (GO:0005912)	278	16	4.3	+	3.72	1.26e-05	0.000207			dihydrolipoyl dehydrogenase complex (GO:0045240)	10	3	0.11	+	27.71	0.00032	0.00525			clathrin-coated vesicle membrane (GO:0030665)	34	4	0.28	+	14.08	0.00027	0.00443
nucleoplasm (GO:0005654)	2735	71	42.26	+	1.68	1.52e-05	0.000247			neurofilament (GO:0005883)	10	3	0.11	+	27.71	0.00032	0.0053			nuclear lamina (GO:0005652)	13	3	0.11	+	27.62	0.00029	0.00471
synaptic membrane (GO:0097060)	351	18	5.42	+	3.32	1.62e-05	0.000261			respiratory chain complex (GO:0098803)	81	6	0.88	+	6.84	0.000347	0.0056			COP9 signalosome (GO:0008180)	35	4	0.29	+	13.68	0.000299	0.00478
transport vesicle (GO:0030133)	287	16	4.43	+	3.61	1.83e-05	0.000292			uropod (GO:0001931)	11	3	0.12	+	25.19	0.000405	0.00642			cell-cell adherens junction (GO:0005913)	103	6	0.86	+	6.97	0.000298	0.00481
polymeric cytoskeletal fiber (GO:0099513)	655	26	10.12	+	2.57	1.84e-05	0.000292			cell trailing edge (GO:0031254)	11	3	0.12	+	25.19	0.000405	0.00647			coated membrane (GO:0048475)	104	6	0.87	+	6.91	0.000313	0.00489
respiratory chain (GO:0070469)	89	9	1.38	+	6.54	1.89e-05	0.000297			cortical actin cytoskeleton (GO:0030864)	84	6	0.91	+	6.6	0.000417	0.00656			membrane coat (GO:0030117)	104	6	0.87	+	6.91	0.000313	0.00493
anchoring junction (GO:0070161)	292	16	4.51	+	3.55	2.23e-05	0.000348			anchoring junction (GO:0070161)	292	11	3.16	+	3.48	0.000452	0.00705			contractile fiber part (GO:0044449)	196	8	1.64	+	4.89	0.000311	0.00494
MICOS complex (GO:0061617)	8	4	0.12	+	32.36	2.37e-05	0.000367			nuclear matrix (GO:0016363)	86	6	0.93	+	6.44	0.000469	0.00726			DNA packaging complex (GO:0044815)	67	5	0.56	+	8.93	0.00033	0.00508
clathrin coat (GO:0030118)	52	7	0.8	+	8.71	3.07e-05	0.000472			dendrite cytoplasm (GO:0032839)	31	4	0.34	+	11.92	0.000518	0.00795			basement membrane (GO:0005604)	105	6	0.88	+	6.84	0.000329	0.00509
COP9 signalosome (GO:0008180)	35	6	0.54	+	11.09	3.41e-05	0.00052			respiratory chain (GO:0070469)	89	6	0.96	+	6.23	0.000557	0.00849			plasma membrane region (GO:0098590)	1052	21	8.79	+	2.39	0.00034	0.00518
nuclear body (GO:0016604)	640	25	9.89	+	2.53	3.44e-05	0.00052			plasma membrane bounded cell projection cytoplasm (GO:0032838)	165	8	1.79	+	4.48	0.000572	0.00865			endoplasmic reticulum chaperone complex (GO:0034663)	14	3	0.12	+	25.65	0.000349	0.00528
distal axon (GO:0150034)	338	17	5.22	+	3.25	3.5e-05	0.000525			mitochondrial proton-transporting ATP synthase complex, coupling factor F(o) (GO:0000276)	13	3	0.14	+	21.32	0.000613	0.0092			dendrite (GO:0030425)	706	16	5.9	+	2.71	0.000353	0.00529
exocytic vesicle (GO:0070382)	208	13	3.21	+	4.04	3.69e-05	0.000549			mitochondrial matrix (GO:0005759)	259	10	2.8	+	3.57	0.00068	0.01			dendritic tree (GO:0097447)	709	16	5.92	+	2.7	0.000369	0.00549
postsynaptic membrane (GO:0045211)	272	15	4.2	+	3.57	3.75e-05	0.000554			multi-eIF complex (GO:0043614)	2	2	0.02	+	92.37	0.000676	0.0101			organelle inner membrane (GO:0019866)	440	12	3.68	+	3.26	0.000408	0.00604
cytosolic small ribosomal subunit (GO:0022627)	55	7	0.85	+	8.24	4.26e-05	0.000625			cytoplasmic vesicle (GO:0031410)	1768	35	19.14	+	1.83	0.000705	0.0103			extracellular exosome (GO:0070062)	72	5	0.6	+	8.31	0.000451	0.00662
flotillin complex (GO:0016600)	10	4	0.15	+	25.89	4.68e-05	0.000681			intracellular vesicle (GO:0097708)	1773	35	19.19	+	1.82	0.000717	0.0104			lamellipodium (GO:0030027)	158	7	1.32	+	5.3	0.000463	0.00674
plasma membrane protein complex (GO:0098797)	540	22	8.34	+	2.64	5.65e-05	0.000817			smooth endoplasmic reticulum (GO:0005790)	35	4	0.38	+	10.56	0.000786	0.0114			coated vesicle membrane (GO:0030662)	74	5	0.62	+	8.09	0.000508	0.00734
mitochondrial respiratory chain complex III (GO:0005750)	11	4	0.17	+	23.53	6.3e-05	0.000891			cell leading edge (GO:0031252)	365	12	3.95	+	3.04	0.000807	0.0116			bounding membrane of organelle (GO:0098588)	1010	20	8.44	+	2.37	0.000521	0.00747
uropod (GO:0001931)	11	4	0.17	+	23.53	6.3e-05	0.000897			proton-transporting ATP synthase complex, coupling factor F(o) (GO:0045263)	15	3	0.16	+	18.47	0.000879	0.0125			mitochondrial inner membrane (GO:0005743)	398	11	3.33	+	3.31	0.000638	0.00909
cell trailing edge (GO:0031254)	11	4	0.17	+	23.53	6.3e-05	0.000904			dendritic shaft (GO:0043198)	67	5	0.73	+	6.89	0.00105	0.0149			extracellular vesicle (GO:1903561)	79	5	0.66	+	7.58	0.000673	0.00951
secretory vesicle (GO:0099503)	546	22	8.44	+	2.61	6.6e-05	0.000927			cluster of actin-based cell projections (GO:0098862)	183	8	1.98	+	4.04	0.00109	0.0153			postsynapse (GO:0098794)	539	13	4.5	+	2.89	0.000728	0.0102
small ribosomal subunit (GO:0015935)	82	8	1.27	+	6.31	6.95e-05	0.000968			dendritic filopodium (GO:1902737)	3	2	0.03	+	61.58	0.00112	0.0155			nucleus (GO:0005634)	6640	77	55.48	+	1.39	0.000924	0.0129
growth cone (GO:0030426)	192	12	2.97	+	4.04	7.31e-05	0.00101			CA3 pyramidal cell dendrite (GO:0097442)	3	2	0.03	+	61.58	0.00112	0.0156			clathrin coat of coated pit (GO:0030132)	21	3	0.18	+	17.1	0.000997	0.0138
intercalated disc (GO:0014704)	61	7	0.94	+	7.43	7.77e-05	0.00107			focal adhesion (GO:0005925)	146	7	1.58	+	4.43	0.00134	0.0184			intracellular organelle lumen (GO:0070013)	3949	51	32.99	+	1.55	0.00103	0.0141
respiratory chain complex III (GO:0045275)	12	4	0.19	+	21.57	8.3e-05	0.00112			nuclear membrane (GO:0031965)	236	9	2.55	+	3.52	0.00136	0.0184			cluster of actin-based cell projections (GO:0098862)	183	7	1.53	+	4.58	0.00106	0.0145
site of polarized growth (GO:0030427)	195	12	3.01	+	3.98	8.4e-05	0.00113			excitatory synapse (GO:0060076)	41	4	0.44	+	9.01	0.00135	0.0185			brush border (GO:0005903)	133	6	1.11	+	5.4	0.00108	0.0146
mitochondrial matrix (GO:0005759)	259	14	4	+	3.5	8.29e-05	0.00113			distal axon (GO:0150034)	338	11	3.66	+	3.01	0.00143	0.0192			cytosolic large ribosomal subunit (GO:0022625)	89	5	0.74	+	6.72	0.00112	0.0151
contractile fiber part (GO:0044449)	196	12	3.03	+	3.96	8.8e-05	0.00118			nucleolus (GO:0005730)	803	19	8.69	+	2.19	0.00156	0.0209			clathrin coat (GO:0030118)	52	4	0.43	+	9.21	0.0012	0.016
microtubule cytoskeleton (GO:0015630)	1112	35	17.18	+	2.04	9.47e-05	0.00126			cell-substrate adherens junction (GO:0005924)	152	7	1.65	+	4.25	0.00167	0.022			extracellular organelle (GO:0043230)	91	5	0.76	+	6.58	0.00123	0.0163
nuclear speck (GO:0016607)	299	15	4.62	+	3.25	0.000103	0.00136			contractile fiber part (GO:0044449)	196	8	2.12	+	3.77	0.00165	0.022			mitochondrial membrane (GO:0031966)	575	13	4.8	+	2.71	0.00129	0.017
proton-transporting two-sector ATPase complex, catalytic domain (GO:0033178)	13	4	0.2	+	19.91	0.000107	0.0014			inclusion body (GO:0016234)	76	5	0.82	+	6.08	0.00179	0.0234			cell periphery (GO:0071944)	5292	64	44.21	+	1.45	0.0013	0.0171
filopodium (GO:0030175)	89	8	1.38	+	5.82	0.000118	0.00154			axon initial segment (GO:0043194)	20	3	0.22	+	13.86	0.00183	0.0239			translation preinitiation complex (GO:0070993)	5	2	0.04	+	47.88	0.0014	0.0178
presynapse (GO:0098793)	377	17	5.83	+	2.92	0.000126	0.00162			whole membrane (GO:0098805)	1052	23	11.39	+	2.02	0.00192	0.0248			lamin filament (GO:0005638)	5	2	0.04	+	47.88	0.0014	0.0179
focal adhesion (GO:0005925)	146	10	2.26	+	4.43	0.000144	0.00185			cell-substrate junction (GO:0030055)	159	7	1.72	+	4.07	0.00213	0.0273			caveola (GO:0005901)	94	5	0.79	+	6.37	0.00141	0.0179
neuron projection cytoplasm (GO:0120111)	48	6	0.74	+	8.09	0.000166	0.00212			myofibril (GO:0030016)	205	8	2.22	+	3.6	0.00217	0.0276			membrane-enclosed lumen (GO:0031974)	3954	51	33.04	+	1.54	0.00139	0.0179
caveola (GO:0005901)	94	8	1.45	+	5.51	0.000168	0.00213			translation preinitiation complex (GO:0070993)	5	2	0.05	+	36.95	0.00232	0.029			organelle lumen (GO:0043233)	3954	51	33.04	+	1.54	0.00139	0.018
lamin filament (GO:0005638)	5	3	0.08	+	38.83	0.000185	0.00231			proton-transporting ATP synthase complex, catalytic core F(1) (GO:0045261)	5	2	0.05	+	36.95	0.00232	0.0291			nuclear part (GO:0044428)	4014	51	33.54	+	1.52	0.00154	0.0193
proton-transporting two-sector ATPase complex (GO:0016469)	49	6	0.76	+	7.92	0.000184	0.00231			mitochondrial proton-transporting ATP synthase complex, catalytic core F(1) (GO:0000275)	5	2	0.05	+	36.95	0.00232	0.0293			pinosome (GO:0044352)	6	2	0.05	+	39.9	0.00185	0.023
cell-substrate adherens junction (GO:0005924)	152	10	2.35	+	4.26	0.000196	0.00243			proton-transporting two-sector ATPase complex, proton-transporting domain (GO:0033177)	24	3	0.26	+	11.55	0.00293	0.0365			macropinosome (GO:0044354)	6	2	0.05	+	39.9	0.00185	0.0231
neuromuscular junction (GO:0031594)	72	7	1.11	+	6.29	0.000201	0.00249			spectrin-associated cytoskeleton (GO:0014731)	6	2	0.06	+	30.79	0.00307	0.0378			myofibril (GO:0030016)	205	7	1.71	+	4.09	0.00199	0.0246
AP-type membrane coat adaptor complex (GO:0030119)	51	6	0.79	+	7.61	0.000224	0.00275			cytosolic large ribosomal subunit (GO:0022625)	89	5	0.96	+	5.19	0.00342	0.042			intercalated disc (GO:0014704)	61	4	0.51	+	7.85	0.00208	0.0256
protein-DNA complex (GO:0032993)	155	10	2.4	+	4.18	0.000227	0.00277			basolateral plasma membrane (GO:0016323)	223	8	2.41	+	3.31	0.00356	0.0434			actomyosin contractile ring (GO:0005826)	7	2	0.06	+	34.2	0.00237	0.0287
cytochrome complex (GO:0070069)	32	5	0.49	+	10.11	0.000232	0.00281			apical dendrite (GO:0097440)	26	3	0.28	+	10.66	0.00361	0.0437			mitochondrial envelope (GO:0005740)	617	13	5.16	+	2.52	0.00236	0.0288
contractile fiber (GO:0043292)	220	12	3.4	+	3.53	0.000244	0.00294			centrosome (GO:0005813)	505	13	5.47	+	2.38	0.00405	0.0488			transport vesicle membrane (GO:0030658)	108	5	0.9	+	5.54	0.00252	0.0304
cell-substrate junction (GO:0030055)	159	10	2.46	+	4.07	0.000276	0.0033													sarcolemma (GO:0042383)	161	6	1.35	+	4.46	0.00273	0.0327
cell-cell adherens junction (GO:0005913)	103	8	1.59	+	5.03	0.0003	0.00357													microtubule (GO:0005874)	413	10	3.45	+	2.9	0.00288	0.0342
sarcolemma (GO:0042383)	161	10	2.49	+	4.02	0.000303	0.00358													collagen-containing extracellular matrix (GO:0062023)	163	6	1.36	+	4.41	0.0029	0.0343
vesicle coat (GO:0030120)	56	6	0.87	+	6.93	0.000357	0.00419													basal dendrite (GO:0097441)	8	2	0.07	+	29.92	0.00294	0.0346
transport vesicle membrane (GO:0030658)	108	8	1.67	+	4.79	0.000405	0.00473													plasma membrane raft (GO:0044853)	116	5	0.97	+	5.16	0.00339	0.0396
actin-based cell projection (GO:0098858)	200	11	3.09	+	3.56	0.000411	0.00478													cerebellar mossy fiber (GO:0044300)	9	2	0.08	+	26.6	0.00358	0.0415
cytoplasmic stress granule (GO:0010494)	59	6	0.91	+	6.58	0.000461	0.00533													immunological synapse (GO:0001772)	35	3	0.29	+	10.26	0.00382	0.044
myofibril (GO:0030016)	205	11	3.17	+	3.47	0.000501	0.00575													synaptic vesicle membrane (GO:0030672)	74	4	0.62	+	6.47	0.00404	0.0461
integral component of mitochondrial inner membrane (GO:0031305)	39	5	0.6	+	8.3	0.000529	0.006													exocytic vesicle membrane (GO:0099501)	74	4	0.62	+	6.47	0.00404	0.0464
tRNA-splicing ligase complex (GO:0072669)	8	3	0.12	+	24.27	0.000526	0.00601													Z disc (GO:0030018)	122	5	1.02	+	4.91	0.00417	0.0473
clathrin-coated pit (GO:0005905)	62	6	0.96	+	6.26	0.000588	0.0066													cell tip (GO:0051286)	10	2	0.08	+	23.94	0.00427	0.0478
intrinsic component of mitochondrial inner membrane (GO:0031304)	40	5	0.62	+	8.09	0.000588	0.00663													mitochondrial part (GO:0044429)	799	15	6.68	+	2.25	0.0043	0.048
plasma membrane raft (GO:0044853)	116	8	1.79	+	4.46	0.000632	0.00704													clathrin coat of trans-Golgi network vesicle (GO:0030130)	10	2	0.08	+	23.94	0.00427	0.0481
mitochondrial proton-transporting ATP synthase complex (GO:0005753)	23	4	0.36	+	11.25	0.000701	0.00777													inclusion body (GO:0016234)	76	4	0.63	+	6.3	0.00442	0.049
sarcomere (GO:0030017)	182	10	2.81	+	3.56	0.000752	0.00828
extracellular region (GO:0005576)	2680	22	41.41	-	0.53	0.000764	0.00838
endocytic vesicle (GO:0030139)	183	10	2.83	+	3.54	0.000782	0.00852
proton-transporting ATP synthase complex (GO:0045259)	24	4	0.37	+	10.79	0.000808	0.00876
Z disc (GO:0030018)	122	8	1.89	+	4.24	0.000862	0.00924
integral component of mitochondrial membrane (GO:0032592)	67	6	1.04	+	5.8	0.000859	0.00926
endoplasmic reticulum-Golgi intermediate compartment (GO:0005793)	68	6	1.05	+	5.71	0.000923	0.00979
membrane (GO:0016020)	9252	174	142.97	+	1.22	0.000922	0.00983
intrinsic component of mitochondrial membrane (GO:0098573)	69	6	1.07	+	5.63	0.000991	0.0104
clathrin vesicle coat (GO:0030125)	26	4	0.4	+	9.96	0.00106	0.011
T-tubule (GO:0030315)	70	6	1.08	+	5.55	0.00106	0.011
apical dendrite (GO:0097440)	26	4	0.4	+	9.96	0.00106	0.0111
multi-eIF complex (GO:0043614)	2	2	0.03	+	64.72	0.00136	0.014
coated vesicle membrane (GO:0030662)	74	6	1.14	+	5.25	0.00139	0.0141
exocytic vesicle membrane (GO:0099501)	74	6	1.14	+	5.25	0.00139	0.0142
synaptic vesicle membrane (GO:0030672)	74	6	1.14	+	5.25	0.00139	0.0142
cell periphery (GO:0071944)	5292	108	81.77	+	1.32	0.00141	0.0142
I band (GO:0031674)	135	8	2.09	+	3.83	0.00159	0.016
fascia adherens (GO:0005916)	13	3	0.2	+	14.93	0.00169	0.0168
nuclear lamina (GO:0005652)	13	3	0.2	+	14.93	0.00169	0.0169
extracellular space (GO:0005615)	1904	14	29.42	-	0.48	0.00171	0.017
extrinsic component of membrane (GO:0019898)	280	12	4.33	+	2.77	0.00183	0.018
endoplasmic reticulum lumen (GO:0005788)	79	6	1.22	+	4.92	0.0019	0.0184
mitochondrial outer membrane (GO:0005741)	172	9	2.66	+	3.39	0.00188	0.0184
endoplasmic reticulum (GO:0005783)	1662	42	25.68	+	1.64	0.0019	0.0185
endoplasmic reticulum chaperone complex (GO:0034663)	14	3	0.22	+	13.87	0.00203	0.0195
axon cytoplasm (GO:1904115)	14	3	0.22	+	13.87	0.00203	0.0196
clathrin adaptor complex (GO:0030131)	32	4	0.49	+	8.09	0.00211	0.0202
ionotropic glutamate receptor complex (GO:0008328)	55	5	0.85	+	5.88	0.00218	0.0207
early endosome (GO:0005769)	248	11	3.83	+	2.87	0.00217	0.0207
dendritic filopodium (GO:1902737)	3	2	0.05	+	43.14	0.00224	0.0209
mitotic spindle microtubule (GO:1990498)	3	2	0.05	+	43.14	0.00224	0.021
Myb complex (GO:0031523)	3	2	0.05	+	43.14	0.00224	0.0211
mitochondrial respiratory chain complex IV (GO:0005751)	15	3	0.23	+	12.94	0.00241	0.0222
dendritic spine head (GO:0044327)	15	3	0.23	+	12.94	0.00241	0.0223
neurotransmitter receptor complex (GO:0098878)	57	5	0.88	+	5.68	0.00252	0.0232
clathrin-coated vesicle membrane (GO:0030665)	34	4	0.53	+	7.61	0.00259	0.0237
actin filament (GO:0005884)	115	7	1.78	+	3.94	0.00267	0.0244
nucleosome (GO:0000786)	58	5	0.9	+	5.58	0.00271	0.0246
leading edge membrane (GO:0031256)	148	8	2.29	+	3.5	0.00274	0.0248
extracellular region part (GO:0044421)	2105	17	32.53	-	0.52	0.00278	0.025
external side of plasma membrane (GO:0009897)	584	1	9.02	-	0.11	0.00286	0.0256
axonal spine (GO:0044308)	4	2	0.06	+	32.36	0.00333	0.0291
U2-type precatalytic spliceosome (GO:0071005)	17	3	0.26	+	11.42	0.00329	0.0291
neurofibrillary tangle (GO:0097418)	4	2	0.06	+	32.36	0.00333	0.0292
myosin II complex (GO:0016460)	17	3	0.26	+	11.42	0.00329	0.0293
Golgi-associated vesicle membrane (GO:0030660)	61	5	0.94	+	5.3	0.00332	0.0293
organelle outer membrane (GO:0031968)	189	9	2.92	+	3.08	0.00343	0.0298
outer membrane (GO:0019867)	189	9	2.92	+	3.08	0.00343	0.0299
membrane raft (GO:0045121)	351	13	5.42	+	2.4	0.00405	0.035
membrane microdomain (GO:0098857)	352	13	5.44	+	2.39	0.00414	0.0356
translation preinitiation complex (GO:0070993)	5	2	0.08	+	25.89	0.00461	0.0389
nuclear membrane (GO:0031965)	236	10	3.65	+	2.74	0.00462	0.0389
proton-transporting ATP synthase complex, catalytic core F(1) (GO:0045261)	5	2	0.08	+	25.89	0.00461	0.0391
TIM22 mitochondrial import inner membrane insertion complex (GO:0042721)	5	2	0.08	+	25.89	0.00461	0.0393
mitochondrial proton-transporting ATP synthase complex, catalytic core F(1) (GO:0000275)	5	2	0.08	+	25.89	0.00461	0.0394
mitotic spindle (GO:0072686)	96	6	1.48	+	4.04	0.00471	0.0394
DNA packaging complex (GO:0044815)	67	5	1.04	+	4.83	0.00482	0.04
excitatory synapse (GO:0060076)	41	4	0.63	+	6.31	0.0048	0.0401
precatalytic spliceosome (GO:0071011)	20	3	0.31	+	9.71	0.00494	0.0405
respiratory chain complex IV (GO:0045277)	20	3	0.31	+	9.71	0.00494	0.0406
axon initial segment (GO:0043194)	20	3	0.31	+	9.71	0.00494	0.0408
ruffle membrane (GO:0032587)	68	5	1.05	+	4.76	0.00511	0.0417
plasma membrane bounded cell projection cytoplasm (GO:0032838)	165	8	2.55	+	3.14	0.00512	0.0417
clathrin coat of coated pit (GO:0030132)	21	3	0.32	+	9.25	0.00558	0.0452
nucleoplasm part (GO:0044451)	1000	27	15.45	+	1.75	0.0057	0.046
CRD-mediated mRNA stability complex (GO:0070937)	6	2	0.09	+	21.57	0.00608	0.0485
box C/D snoRNP complex (GO:0031428)	6	2	0.09	+	21.57	0.00608	0.0487
proton-transporting V-type ATPase, V1 domain (GO:0033180)	6	2	0.09	+	21.57	0.00608	0.0489

## Sheet: S9 Significant TFs and targets
G-CSF
Transcription Factor	Combined Score	Downstream	P-value	Adjusted P-value	Z-score	Genes
E2F1_CHEA	49.0798	50/859	8.04211e-14	2.07084e-12	-1.62777	RPL3, RPLP1, HP1BP3, ETFB, PRPF19, LMNB2, LMNB1, MECP2, RPS16, PSMD5, RPLP2, DDX17, RBM14, H2AFX, TIMM22, PGD, ATAD3A, ILF3, GORASP2, NCL, MYH9, MATR3, UQCRC2, SRSF7, USP14, GMPS, SLC1A2, SLC3A2, PHB, CAND1, MLEC, RPS2, NDUFV2, UGGT1, FUS, SGTA, RPL23A, HNRNPL, TJP1, HNRNPM, ALDH6A1, HNRNPK, SERBP1, HNRNPA2B1, UBA1, ESYT1, HNRNPC, FARSA, SUGP2, PICALM
ATF2_ENCODE	37.9775	96/2852	8.47326e-11	1.74549e-09	-1.63756	RPL3, WDR1, RPL31, RPLP1, COX4I1, CLTC, HNRNPU, PSIP1, RPL10A, YARS2, PHB2, PFAS, CCAR2, RPL6, LMNB1, PPP1R9B, RPL7, EEA1, SYNCRIP, TRMT112, RPL7A, LASP1, SYNGAP1, RPS16, HINT2, TRIM28, RPS19, PSMD5, RPLP2, DLAT, UBXN4, YWHAH, RBM14, PDCD6IP, SPHK2, SACM1L, H2AFX, VPS33B, TIMM22, TUFM, ILF3, SFPQ, PREPL, DDX39B, GORASP2, CDC37, NCL, LANCL2, ERP29, MATR3, TLN1, SRSF7, SNAP47, CAMK2D, SET, UQCRB, D…
CREB1_ENCODE	13.6943	65/2238	2.97561e-05	0.00023576	-1.31392	RPL3, WDR1, RPL31, CLTC, CYP46A1, PHB2, PFAS, CCAR2, EEA1, TRIM28, PSMD5, KHSRP, RPLP2, PMPCA, UBXN4, RBM14, SPHK2, SACM1L, TIMM22, WBP11, RANGAP1, ATAD3A, TUFM, GAK, ILF3, SFPQ, CDC37, LANCL2, CHMP4B, PABPC1, TLN1, USP14, UQCRB, COPS7A, PAK1, CAND1, HSPH1, TPR, ATP5D, G3BP2, RPL13, RPS2, ATG7, HNRNPA3, CPSF6, HSPA5, API5, SGTA, RPL23A, AP2B1, HSPE1, HNRNPL, RPS26, AHI1, ALDH6A1, HNRNPK, SNX16, S…
Cocaine
Transcription Factor	Combined Score	Downstream	P-value	Adjusted P-value	Z-score	Genes
E2F1_CHEA	19.2884	27/859	5.44878e-06	0.000107886	-1.59143	PHB, ATP5O, PRPF19, LMNB2, LMNB1, MECP2, CFL2, RPS2, PDHA1, FUS, H2AFX, RPL23A, PGD, HNRNPL, TJP1, DYNC1LI2, ILF3, NCL, SERBP1, HNRNPA2B1, HNRNPD, MYH9, KRAS, MATR3, P4HB, RPL26, TPT1
ATF2_ENCODE	9.32275	51/2852	0.00218969	0.0218981	-1.52233	RPL31, PFAS, ELAVL1, LMNB1, EEF1B2, RPL7A, LASP1, SYNGAP1, RPS19, SRRM2, PDCD6IP, SACM1L, H2AFX, ILF3, PREPL, PPA2, NCL, NDUFS3, HNRNPH2, MATR3, RPL26, BCAT1, TLN1, SNAP47, SET, UQCRB, DHX9, DDX1, MRPS34, ATP5O, ATP5B, RPS2, HNRNPA3, HSPA5, FUS, ASNS, RPL23A, RPS26, CS, GSTA4, APEX1, CAPZA1, HNRNPA2B1, SERBP1, HNRNPD, PNPLA6, P4HB, EIF3A, TPT1, RPS23, METAP2
CREB1_ENCODE	1.93842	37/2238	0.0289059	0.0861519	-0.547002	UQCRB, RPL31, PFAS, EEF1B2, NARS, ATP5B, RPS2, ABCF2, ATG7, EMD, SRRM2, HNRNPA3, MECR, PDHA1, HSPA5, TRAPPC10, SACM1L, ATP1B3, RPL23A, RANGAP1, HNRNPL, RPS26, AHI1, TOM1L2, ILF3, PITHD1, CAPZA1, HNRNPA2B1, HNRNPD, EIF3H, HNRNPH2, PNPLA6, P4HB, TLN1, DLD, EIF3A, TPT1
G-CSF & Cocaine
Transcription Factor	Combined Score	Downstream	P-value	Adjusted P-value	Z-score	Genes
E2F1_CHEA	17.7468	22/859	1.84121e-05	0.000460302	-1.62777	DARS, USP14, RBM14, FUS, RPLP1, HP1BP3, TBCD, RPL23A, TIMM22, LMNB2, MECP2, TJP1, CAND1, NCL, SERBP1, HNRNPA2B1, RPLP2, MYH9, RPS20, MATR3, TPT1, PICALM
ATF2_ENCODE	14.1518	46/2852	0.000115373	0.00164818	-1.56074	SNAP47, HDAC2, SET, MOCS3, RPLP1, CLTB, PSIP1, RPL10A, ELAVL1, HSP90B1, PCNP, RPL7A, LASP1, PAK1, CAND1, RPS19, RPLP2, HIST1H1E, HARS, HIST1H1B, DARS, HNRNPA3, RBM14, PDCD6IP, HSPA5, FUS, API5, RALGAPA1, ASNS, RPL23A, TIMM22, RPS26, MYL6, MARCKS, GSTA4, APEX1, NCL, HNRNPA2B1, SERBP1, RPS20, MATR3, TLN1, PTMA, TPT1, ARL8B, PICALM
CREB1_ENCODE	-0.153306	27/2238	0.0998268	0.203728	0.0665299	USP14, PCNP, PAK1, CAND1, RPLP2, HIST1H1E, ATG7, EMD, HNRNPA3, SLC30A9, RBM14, HSPA5, API5, RALGAPA1, RPL23A, TIMM22, RANGAP1, RPS26, AHI1, GALE, MYL6, EHD4, HNRNPA2B1, EIF3H, CHMP4B, TLN1, TPT1

[truncated: 1 more sheets: S10 Hierarchical regulation]
